# Supplementary material for: Analysis of the potential ferroptosis mechanism and multitemporal expression change of central ferroptosis-related genes in cardiac ischemia–reperfusion injury
Source: Front Physiol. 2022 Aug 26;13:934901. doi: 10.3389/fphys.2022.934901 (PMC9461145; doi:10.3389/fphys.2022.934901)
Supplement: Supplementary file 1 [file Table2.XLSX]

## Sheet: Sheet1
Gene	regulation
CD44	ups
ANXA1	ups
ATF3	ups
PLIN2	ups
CD82	ups
SNRPA	ups
CASP8	ups
AHCY	ups
ALYREF	ups
YWHAZ	ups
CTSB	ups
RPL7	ups
TNF	ups
EIF2S1	ups
CAPG	ups
GCH1	ups
ERH	ups
TGFB1	ups
IL6	ups
PTBP1	ups
NAP1L1	ups
HMOX1	ups
PSAT1	ups
G6PD	ups
RIPK1	ups
SLC3A2	ups
ASNS	ups
HIF1A	ups
SRC	ups
XBP1	ups
TP53	ups
LAMP2	ups
HNRNPA3	ups
HILPDA	ups
PDIA4	ups
HNRNPA1	ups
ACSL4	ups
SAT1	ups
ULK1	downs
HDDC3	downs
ACSL1	downs
SIRT3	downs
GABARAPL1	downs
