# Supplementary material for: Analysis of the potential ferroptosis mechanism and multitemporal expression change of central ferroptosis-related genes in cardiac ischemia–reperfusion injury
Source: Front Physiol. 2022 Aug 26;13:934901. doi: 10.3389/fphys.2022.934901 (PMC9461145; doi:10.3389/fphys.2022.934901)
Supplement: Supplementary file 2 [file Table3.XLSX]

## Sheet: Sheet1
Block Type	96alum
Chemistry	SYBR_GREEN
Experiment File Name	D:\CWX\20211130.eds
Experiment Run End Time	2021-11-30 12:35:17 PM CST
Instrument Type	sds7500
Passive Reference	ROX
D1	WT-CTR-11-26	HIF1A	UNKNOWN	SYBR	None	1	0.674858	1.48179	20.4916	20.6076	0.285371		3.86022	0.204342			0	TRUE	3.11077	TRUE	3	12	1	83.2714				N	N	N
D2	H2-11-26	HIF1A	UNKNOWN	SYBR	None	1.36896	0.95733	1.95758	20.3886	20.3242	0.259105		3.40714	0.185846			-0.453079	TRUE	3.11077	TRUE	3	12	1	83.2714				N	N	N
D3	H2R2-11-26	HIF1A	UNKNOWN	SYBR	None	1.19874	1.00007	1.43688	20.0959	20.0066	0.16207		3.5987	0.0941576			-0.26152	TRUE	3.11077	TRUE	3	11	1	83.4629				N	N	N
D4	H2R4-11-26	HIF1A	UNKNOWN	SYBR	None	0.848259	0.677615	1.06188	20.9721	20.879	0.0866263		4.09764	0.11671			0.237424	TRUE	3.11077	TRUE	3	12	1	83.4629				N	Y	N
D5	H2R8-11-26	HIF1A	UNKNOWN	SYBR	None	0.867699	0.764928	0.984277	20.5559	20.5705	0.0499414		4.06495	0.0655047			0.204734	TRUE	3.11077	TRUE	3	11	1	83.4629				N	N	N
D6	H2R24-11-26	HIF1A	UNKNOWN	SYBR	None	1.06552	0.740368	1.53346	20.4506	20.4068	0.195118		3.76866	0.189177			-0.0915546	TRUE	3.11077	TRUE	3	10	1	83.4629				N	N	N
D7	H4-11-26	HIF1A	UNKNOWN	SYBR	None	1.40069	1.10572	1.77434	20.3922	20.3432	0.0698245		3.37408	0.122872			-0.486136	TRUE	3.11077	TRUE	3	13	1	83.4629				N	Y	N
D8	H4R2-11-26	HIF1A	UNKNOWN	SYBR	None	1.22067	0.913615	1.63093	20.2239	20.1218	0.108919		3.57254	0.150558			-0.287675	TRUE	3.11077	TRUE	3	11	1	83.2714				N	N	N
D9	H4R4-11-26	HIF1A	UNKNOWN	SYBR	None	0.806483	0.512158	1.26995	20.5401	20.5448	0.0225191		4.1705	0.205833			0.310285	TRUE	3.11077	TRUE	3	13	1	83.2714				N	N	N
D10	H4R8-11-26	HIF1A	UNKNOWN	SYBR	None	0.676402	0.57179	0.800152	21.279	21.2064	0.08114		4.42426	0.076166			0.564048	TRUE	3.11077	TRUE	3	12	1	83.08				N	N	N
D11	H4R24-11-26	HIF1A	UNKNOWN	SYBR	None	1.05091	0.730347	1.51219	20.4152	20.555	0.192487		3.78857	0.164965			-0.0716445	TRUE	3.11077	TRUE	3	13	1	82.8886				N	N	N
D12	H2R4-11-26	FTH1	UNKNOWN	SYBR	None				16.8954	16.7813	0.182646							TRUE	2.74741	TRUE	3	8	1	89.78				N	N	N
E1	WT-CTR-11-26	HIF1A	UNKNOWN	SYBR	None	1	0.674858	1.48179	20.9327	20.6076	0.285371		3.86022	0.204342			0	TRUE	3.11077	TRUE	3	11	1	83.4629				N	N	N
E2	H2-11-26	HIF1A	UNKNOWN	SYBR	None	1.36896	0.95733	1.95758	20.5451	20.3242	0.259105		3.40714	0.185846			-0.453079	TRUE	3.11077	TRUE	3	12	1	83.4629				N	N	N
E3	H2R2-11-26	HIF1A	UNKNOWN	SYBR	None	1.19874	1.00007	1.43688	19.8195	20.0066	0.16207		3.5987	0.0941576			-0.26152	TRUE	3.11077	TRUE	3	12	1	83.2714				N	N	N
E4	H2R4-11-26	HIF1A	UNKNOWN	SYBR	None	0.848259	0.677615	1.06188	20.8008	20.879	0.0866263		4.09764	0.11671			0.237424	TRUE	3.11077	TRUE	3	12	1	83.4629				N	N	N
E5	H2R8-11-26	HIF1A	UNKNOWN	SYBR	None	0.867699	0.764928	0.984277	20.6261	20.5705	0.0499414		4.06495	0.0655047			0.204734	TRUE	3.11077	TRUE	3	12	1	83.4629				N	N	N
E6	H2R24-11-26	HIF1A	UNKNOWN	SYBR	None	1.06552	0.740368	1.53346	20.1936	20.4068	0.195118		3.76866	0.189177			-0.0915546	TRUE	3.11077	TRUE	3	13	1	83.4629				N	N	N
E7	H4-11-26	HIF1A	UNKNOWN	SYBR	None	1.40069	1.10572	1.77434	20.3742	20.3432	0.0698245		3.37408	0.122872			-0.486136	TRUE	3.11077	TRUE	3	11	1	83.4629				N	N	N
E8	H4R2-11-26	HIF1A	UNKNOWN	SYBR	None	1.22067	0.913615	1.63093	20.0072	20.1218	0.108919		3.57254	0.150558			-0.287675	TRUE	3.11077	TRUE	3	11	1	83.2714				N	N	N
E9	H4R4-11-26	HIF1A	UNKNOWN	SYBR	None	0.806483	0.512158	1.26995	20.5692	20.5448	0.0225191		4.1705	0.205833			0.310285	TRUE	3.11077	TRUE	3	12	1	83.2714				N	Y	N
E10	H4R8-11-26	HIF1A	UNKNOWN	SYBR	None	0.676402	0.57179	0.800152	21.2213	21.2064	0.08114		4.42426	0.076166			0.564048	TRUE	3.11077	TRUE	3	13	1	83.08				N	N	N
E11	H4R24-11-26	HIF1A	UNKNOWN	SYBR	None	1.05091	0.730347	1.51219	20.4752	20.555	0.192487		3.78857	0.164965			-0.0716445	TRUE	3.11077	TRUE	3	9	1	82.8886				N	N	N
E12	H2R8-11-26	FTH1	UNKNOWN	SYBR	None				16.6231	16.5055	0.101875							TRUE	2.74741	TRUE	3	7	1	89.78				N	N	N
F1	WT-CTR-11-26	HIF1A	UNKNOWN	SYBR	None	1	0.674858	1.48179	20.3985	20.6076	0.285371		3.86022	0.204342			0	TRUE	3.11077	TRUE	3	10	1	83.2714				N	N	N
F2	H2-11-26	HIF1A	UNKNOWN	SYBR	None	1.36896	0.95733	1.95758	20.039	20.3242	0.259105		3.40714	0.185846			-0.453079	TRUE	3.11077	TRUE	3	12	1	83.2714				N	N	N
F3	H2R2-11-26	HIF1A	UNKNOWN	SYBR	None	1.19874	1.00007	1.43688	20.1043	20.0066	0.16207		3.5987	0.0941576			-0.26152	TRUE	3.11077	TRUE	3	11	1	83.2714				N	N	N
F4	H2R4-11-26	HIF1A	UNKNOWN	SYBR	None	0.848259	0.677615	1.06188	20.864	20.879	0.0866263		4.09764	0.11671			0.237424	TRUE	3.11077	TRUE	3	13	1	83.2714				N	N	N
F5	H2R8-11-26	HIF1A	UNKNOWN	SYBR	None	0.867699	0.764928	0.984277	20.5294	20.5705	0.0499414		4.06495	0.0655047			0.204734	TRUE	3.11077	TRUE	3	13	1	83.4629				N	N	N
F6	H2R24-11-26	HIF1A	UNKNOWN	SYBR	None	1.06552	0.740368	1.53346	20.5764	20.4068	0.195118		3.76866	0.189177			-0.0915546	TRUE	3.11077	TRUE	3	11	1	83.4629				N	N	N
F7	H4-11-26	HIF1A	UNKNOWN	SYBR	None	1.40069	1.10572	1.77434	20.2633	20.3432	0.0698245		3.37408	0.122872			-0.486136	TRUE	3.11077	TRUE	3	10	1	83.2714				N	N	N
F8	H4R2-11-26	HIF1A	UNKNOWN	SYBR	None	1.22067	0.913615	1.63093	20.1344	20.1218	0.108919		3.57254	0.150558			-0.287675	TRUE	3.11077	TRUE	3	12	1	83.2714				N	N	N
F9	H4R4-11-26	HIF1A	UNKNOWN	SYBR	None	0.806483	0.512158	1.26995	20.5249	20.5448	0.0225191		4.1705	0.205833			0.310285	TRUE	3.11077	TRUE	3	11	1	83.08				N	N	N
F10	H4R8-11-26	HIF1A	UNKNOWN	SYBR	None	0.676402	0.57179	0.800152	21.1188	21.2064	0.08114		4.42426	0.076166			0.564048	TRUE	3.11077	TRUE	3	13	1	83.08				N	Y	N
F11	H4R24-11-26	HIF1A	UNKNOWN	SYBR	None	1.05091	0.730347	1.51219	20.7746	20.555	0.192487		3.78857	0.164965			-0.0716445	TRUE	3.11077	TRUE	3	12	1	82.8886				N	N	N

## Sheet: Sheet2
Block Type	96alum
Chemistry	SYBR_GREEN
Experiment File Name	D:\CWX\20211209.eds
Experiment Run End Time	2021-12-09 19:53:03 PM CST
Instrument Type	sds7500
Passive Reference	ROX
Well	Sample Name	Target Name	Task	Reporter	Quencher	RQ	RQ Min	RQ Max	Cт	Cт Mean	Cт SD	ΔCт	ΔCт Mean	ΔCт SE	HK Control ΔCт Mean	HK Control ΔCт SE	ΔΔCт	Automatic Ct Threshold	Ct Threshold	Automatic Baseline	Baseline Start	Baseline End	Efficiency	Tm1	Tm2	Tm3	Comments	HIGHSD	NOISE	SPIKE	OUTLIERRG
A1	WT-CTR-11-26	Il6	UNKNOWN	SYBR	None	1	0.705368	1.4177	24.4373	24.3456	0.238535		3.74814	0.181366			0	TRUE	3.04381	TRUE	3	16	1	81.6754				N	N	N	N
A2	H2-11-26	Il6	UNKNOWN	SYBR	None	1.39408	0.623752	3.11575	23.9272	24.3937	0.672085		3.26883	0.417897			-0.479313	TRUE	3.04381	TRUE	3	16	1	81.6754				Y	N	N	N
A3	H2R2-11-26	Il6	UNKNOWN	SYBR	None	2.07463	1.89734	2.26849	23.3061	23.2973	0.0473485		2.69529	0.0464178			-1.05285	TRUE	3.04381	TRUE	3	15	1	81.6754				N	N	N	N
A4	H2R4-11-26	Il6	UNKNOWN	SYBR	None	1.46068	0.991981	2.15084	24.6395	24.7624	0.180727		3.2015	0.201069			-0.546642	TRUE	3.04381	TRUE	3	17	1	81.6754				N	N	N	N
A5	H2R8-11-26	Il6	UNKNOWN	SYBR	None	1.04766	0.681253	1.61115	24.0573	24.4336	0.341817		3.68096	0.223636			-0.0671762	TRUE	3.04381	TRUE	3	16	1	81.6754				N	N	N	N
A6	H2R24-11-26	Il6	UNKNOWN	SYBR	None	1.59398	1.13783	2.233	24.333	24.3848	0.0449348		3.07551	0.17517			-0.672633	TRUE	3.04381	TRUE	3	16	1	81.868				N	N	N	N
A7	H4-11-26	Il6	UNKNOWN	SYBR	None	2.28093	1.80184	2.88739	23.3665	23.5085	0.130653		2.55852	0.122511			-1.18962	TRUE	3.04381	TRUE	3	16	1	81.6754				N	N	N	N
A8	H4R2-11-26	Il6	UNKNOWN	SYBR	None	2.57791	2.02465	3.28235	22.889	23.0801	0.175903		2.38194	0.125531			-1.3662	TRUE	3.04381	TRUE	3	15	1	81.6754				N	N	N	N
A9	H4R4-11-26	Il6	UNKNOWN	SYBR	None	1.30211	0.962694	1.76119	24.1226	24.2763	0.271159		3.36729	0.156927			-0.380849	TRUE	3.04381	TRUE	3	17	1	81.6754				N	N	N	N
A10	H4R8-11-26	Il6	UNKNOWN	SYBR	None	1.15577	0.965886	1.38298	25.0392	25.0112	0.0992492		3.53929	0.093258			-0.208851	TRUE	3.04381	TRUE	3	16	1	81.4829				N	N	N	N
A11	H4R24-11-26	Il6	UNKNOWN	SYBR	None	1.53517	1.29987	1.81307	24.6396	24.6725	0.0317836		3.12974	0.0864532			-0.618401	TRUE	3.04381	TRUE	3	16	1	81.2903				N	N	N	N
A12	WT-CTR-11-26	Atf3	UNKNOWN	SYBR	None	1	0.730512	1.3689	25.0158	25.2165	0.19516		4.61902	0.163166			0	TRUE	2.83516	TRUE	3	17	1	80.7126				N	N	N	N
B1	WT-CTR-11-26	Il6	UNKNOWN	SYBR	None	1	0.705368	1.4177	24.5246	24.3456	0.238535		3.74814	0.181366			0	TRUE	3.04381	TRUE	3	16	1	81.868				N	N	N	N
B2	H2-11-26	Il6	UNKNOWN	SYBR	None	1.39408	0.623752	3.11575	25.164	24.3937	0.672085		3.26883	0.417897			-0.479313	TRUE	3.04381	TRUE	3	18	1	81.868				Y	N	N	N
B3	H2R2-11-26	Il6	UNKNOWN	SYBR	None	2.07463	1.89734	2.26849	23.2461	23.2973	0.0473485		2.69529	0.0464178			-1.05285	TRUE	3.04381	TRUE	3	15	1	82.0606				N	N	N	N
B4	H2R4-11-26	Il6	UNKNOWN	SYBR	None	1.46068	0.991981	2.15084	24.97	24.7624	0.180727		3.2015	0.201069			-0.546642	TRUE	3.04381	TRUE	3	17	1	82.0606				N	N	N	N
B5	H2R8-11-26	Il6	UNKNOWN	SYBR	None	1.04766	0.681253	1.61115	24.7249	24.4336	0.341817		3.68096	0.223636			-0.0671762	TRUE	3.04381	TRUE	3	16	1	82.0606				N	N	N	N
B6	H2R24-11-26	Il6	UNKNOWN	SYBR	None	1.59398	1.13783	2.233	24.4105	24.3848	0.0449348		3.07551	0.17517			-0.672633	TRUE	3.04381	TRUE	3	17	1	82.0606				N	N	N	N
B7	H4-11-26	Il6	UNKNOWN	SYBR	None	2.28093	1.80184	2.88739	23.6237	23.5085	0.130653		2.55852	0.122511			-1.18962	TRUE	3.04381	TRUE	3	15	1	81.868				N	N	N	N
B8	H4R2-11-26	Il6	UNKNOWN	SYBR	None	2.57791	2.02465	3.28235	23.1158	23.0801	0.175903		2.38194	0.125531			-1.3662	TRUE	3.04381	TRUE	3	15	1	81.868				N	N	N	N
B9	H4R4-11-26	Il6	UNKNOWN	SYBR	None	1.30211	0.962694	1.76119	24.5894	24.2763	0.271159		3.36729	0.156927			-0.380849	TRUE	3.04381	TRUE	3	17	1	81.6754				N	N	N	Y
B10	H4R8-11-26	Il6	UNKNOWN	SYBR	None	1.15577	0.965886	1.38298	24.9009	25.0112	0.0992492		3.53929	0.093258			-0.208851	TRUE	3.04381	TRUE	3	17	1	81.6754				N	N	N	N
B11	H4R24-11-26	Il6	UNKNOWN	SYBR	None	1.53517	1.29987	1.81307	24.703	24.6725	0.0317836		3.12974	0.0864532			-0.618401	TRUE	3.04381	TRUE	3	18	1	81.4829				N	N	N	N
B12	H2-11-26	Atf3	UNKNOWN	SYBR	None	2.64154	1.19548	5.83678	23.9842	24.3425	0.661002		3.21764	0.411962			-1.40138	TRUE	2.83516	TRUE	3	15	1	80.7126				Y	N	N	N
C1	WT-CTR-11-26	Il6	UNKNOWN	SYBR	None	1	0.705368	1.4177	24.0748	24.3456	0.238535		3.74814	0.181366			0	TRUE	3.04381	TRUE	3	17	1	81.868				N	N	N	N
C2	H2-11-26	Il6	UNKNOWN	SYBR	None	1.39408	0.623752	3.11575	24.0898	24.3937	0.672085		3.26883	0.417897			-0.479313	TRUE	3.04381	TRUE	3	15	1	82.0606				Y	N	N	N
C3	H2R2-11-26	Il6	UNKNOWN	SYBR	None	2.07463	1.89734	2.26849	23.3396	23.2973	0.0473485		2.69529	0.0464178			-1.05285	TRUE	3.04381	TRUE	3	16	1	82.2531				N	N	N	N
C4	H2R4-11-26	Il6	UNKNOWN	SYBR	None	1.46068	0.991981	2.15084	24.6778	24.7624	0.180727		3.2015	0.201069			-0.546642	TRUE	3.04381	TRUE	3	16	1	82.2531				N	N	N	N
C5	H2R8-11-26	Il6	UNKNOWN	SYBR	None	1.04766	0.681253	1.61115	24.5185	24.4336	0.341817		3.68096	0.223636			-0.0671762	TRUE	3.04381	TRUE	3	16	1	82.2531				N	N	N	N
C6	H2R24-11-26	Il6	UNKNOWN	SYBR	None	1.59398	1.13783	2.233	24.4111	24.3848	0.0449348		3.07551	0.17517			-0.672633	TRUE	3.04381	TRUE	3	15	1	82.2531				N	N	N	N
C7	H4-11-26	Il6	UNKNOWN	SYBR	None	2.28093	1.80184	2.88739	23.5351	23.5085	0.130653		2.55852	0.122511			-1.18962	TRUE	3.04381	TRUE	3	15	1	82.0606				N	N	N	N
C8	H4R2-11-26	Il6	UNKNOWN	SYBR	None	2.57791	2.02465	3.28235	23.2353	23.0801	0.175903		2.38194	0.125531			-1.3662	TRUE	3.04381	TRUE	3	15	1	82.0606				N	N	N	N
C9	H4R4-11-26	Il6	UNKNOWN	SYBR	None	1.30211	0.962694	1.76119	24.117	24.2763	0.271159		3.36729	0.156927			-0.380849	TRUE	3.04381	TRUE	3	15	1	81.868				N	N	N	N
C10	H4R8-11-26	Il6	UNKNOWN	SYBR	None	1.15577	0.965886	1.38298	25.0933	25.0112	0.0992492		3.53929	0.093258			-0.208851	TRUE	3.04381	TRUE	3	17	1	81.868				N	N	N	N
C11	H4R24-11-26	Il6	UNKNOWN	SYBR	None	1.53517	1.29987	1.81307	24.6749	24.6725	0.0317836		3.12974	0.0864532			-0.618401	TRUE	3.04381	TRUE	3	16	1	81.6754				N	N	N	N
C12	H2R2-11-26	Atf3	UNKNOWN	SYBR	None	1.8124	1.56051	2.10495	24.3066	24.3631	0.117966		3.76111	0.0777556			-0.857904	TRUE	2.83516	TRUE	3	15	1	80.9051				N	N	N	N
D1	WT-CTR-11-26	Tp53	UNKNOWN	SYBR	None				20.3625	20.5975	0.204406							TRUE	2.58973	TRUE	3	11	1	81.0977				N	N	N	N
D2	H2-11-26	Tp53	UNKNOWN	SYBR	None				21.4135	21.1249	0.268728							TRUE	2.58973	TRUE	3	14	1	81.0977				N	N	N	N
D3	H2R2-11-26	Tp53	UNKNOWN	SYBR	None				20.5296	20.602	0.0649764							TRUE	2.58973	TRUE	3	10	1	81.0977				N	N	N	N
D4	H2R4-11-26	Tp53	UNKNOWN	SYBR	None				21.4359	21.5609	0.297698							TRUE	2.58973	TRUE	3	15	1	81.0977				N	N	N	N
D5	H2R8-11-26	Tp53	UNKNOWN	SYBR	None				20.9274	20.7526	0.18221							TRUE	2.58973	TRUE	3	13	1	81.2903				N	N	N	N
D6	H2R24-11-26	Tp53	UNKNOWN	SYBR	None				21.5416	21.3093	0.300058							TRUE	2.58973	TRUE	3	13	1	81.2903				N	N	N	N
D7	H4-11-26	Tp53	UNKNOWN	SYBR	None				20.9278	20.9499	0.167203							TRUE	2.58973	TRUE	3	14	1	81.0977				N	N	N	N
D8	H4R2-11-26	Tp53	UNKNOWN	SYBR	None				20.8276	20.6981	0.127797							TRUE	2.58973	TRUE	3	11	1	81.0977				N	N	N	N
D9	H4R4-11-26	Tp53	UNKNOWN	SYBR	None				20.9	20.909	0.0187492							TRUE	2.58973	TRUE	3	10	1	80.9051				N	N	N	N
D10	H4R8-11-26	Tp53	UNKNOWN	SYBR	None				21.5732	21.4719	0.127439							TRUE	2.58973	TRUE	3	12	1	80.7126				N	N	N	N
D11	H4R24-11-26	Tp53	UNKNOWN	SYBR	None				21.5253	21.5428	0.146329							TRUE	2.58973	TRUE	3	14	1	80.7126				N	N	N	N
D12	H2R4-11-26	Atf3	UNKNOWN	SYBR	None	1.69062	0.920874	3.10377	25.0679	25.4224	0.458629		3.86147	0.315682			-0.757549	TRUE	2.83516	TRUE	3	17	1	80.9051				N	N	N	N
E1	WT-CTR-11-26	Tp53	UNKNOWN	SYBR	None				20.7342	20.5975	0.204406							TRUE	2.58973	TRUE	3	13	1	81.0977				N	N	N	N
E2	H2-11-26	Tp53	UNKNOWN	SYBR	None				20.8819	21.1249	0.268728							TRUE	2.58973	TRUE	3	11	1	81.0977				N	N	N	N
E3	H2R2-11-26	Tp53	UNKNOWN	SYBR	None				20.6209	20.602	0.0649764							TRUE	2.58973	TRUE	3	11	1	81.0977				N	N	N	N
E4	H2R4-11-26	Tp53	UNKNOWN	SYBR	None				21.9008	21.5609	0.297698							TRUE	2.58973	TRUE	3	14	1	81.0977				N	N	N	N
E5	H2R8-11-26	Tp53	UNKNOWN	SYBR	None				20.7667	20.7526	0.18221							TRUE	2.58973	TRUE	3	13	1	81.2903				N	N	N	N
E6	H2R24-11-26	Tp53	UNKNOWN	SYBR	None				21.4158	21.3093	0.300058							TRUE	2.58973	TRUE	3	14	1	81.2903				N	N	N	N
E7	H4-11-26	Tp53	UNKNOWN	SYBR	None				21.1271	20.9499	0.167203							TRUE	2.58973	TRUE	3	11	1	81.0977				N	N	N	N
E8	H4R2-11-26	Tp53	UNKNOWN	SYBR	None				20.572	20.6981	0.127797							TRUE	2.58973	TRUE	3	14	1	81.0977				N	N	N	N
E9	H4R4-11-26	Tp53	UNKNOWN	SYBR	None				20.8965	20.909	0.0187492							TRUE	2.58973	TRUE	3	12	1	81.0977				N	N	N	N
E10	H4R8-11-26	Tp53	UNKNOWN	SYBR	None				21.5136	21.4719	0.127439							TRUE	2.58973	TRUE	3	14	1	80.9051				N	N	N	N
E11	H4R24-11-26	Tp53	UNKNOWN	SYBR	None				21.6971	21.5428	0.146329							TRUE	2.58973	TRUE	3	13	1	80.7126				N	N	N	N
E12	H2R8-11-26	Atf3	UNKNOWN	SYBR	None	0.811843	0.523031	1.26013	25.8424	25.6723	0.351255		4.91975	0.228459			0.300728	TRUE	2.83516	TRUE	3	17	1	80.9051				N	N	N	N
F1	WT-CTR-11-26	Tp53	UNKNOWN	SYBR	None				20.6957	20.5975	0.204406							TRUE	2.58973	TRUE	3	12	1	81.0977				N	N	N	N
F2	H2-11-26	Tp53	UNKNOWN	SYBR	None				21.0791	21.1249	0.268728							TRUE	2.58973	TRUE	3	14	1	81.0977				N	N	N	N
F3	H2R2-11-26	Tp53	UNKNOWN	SYBR	None				20.6554	20.602	0.0649764							TRUE	2.58973	TRUE	3	12	1	81.0977				N	N	N	N
F4	H2R4-11-26	Tp53	UNKNOWN	SYBR	None				21.3462	21.5609	0.297698							TRUE	2.58973	TRUE	3	11	1	81.0977				N	N	N	N
F5	H2R8-11-26	Tp53	UNKNOWN	SYBR	None				20.5638	20.7526	0.18221							TRUE	2.58973	TRUE	3	10	1	81.0977				N	N	N	N
F6	H2R24-11-26	Tp53	UNKNOWN	SYBR	None				20.9706	21.3093	0.300058							TRUE	2.58973	TRUE	3	13	1	81.0977				N	N	N	N
F7	H4-11-26	Tp53	UNKNOWN	SYBR	None				20.7949	20.9499	0.167203							TRUE	2.58973	TRUE	3	14	1	81.0977				N	N	N	N
F8	H4R2-11-26	Tp53	UNKNOWN	SYBR	None				20.6948	20.6981	0.127797							TRUE	2.58973	TRUE	3	11	1	80.9051				N	N	N	N
F9	H4R4-11-26	Tp53	UNKNOWN	SYBR	None				20.9306	20.909	0.0187492							TRUE	2.58973	TRUE	3	13	1	80.9051				N	N	N	N
F10	H4R8-11-26	Tp53	UNKNOWN	SYBR	None				21.3288	21.4719	0.127439							TRUE	2.58973	TRUE	3	13	1	80.7126				N	N	N	N
F11	H4R24-11-26	Tp53	UNKNOWN	SYBR	None				21.406	21.5428	0.146329							TRUE	2.58973	TRUE	3	11	1	80.7126				N	N	N	N
F12	H2R24-11-26	Atf3	UNKNOWN	SYBR	None	1.68524	1.16184	2.44442	25.0258	25.1754	0.14832		3.86607	0.193247			-0.75295	TRUE	2.83516	TRUE	3	17	1	80.9051				N	N	N	N
G1	WT-CTR-11-26	Atf3	UNKNOWN	SYBR	None	1	0.730512	1.3689	25.2281	25.2165	0.19516		4.61902	0.163166			0	TRUE	2.83516	TRUE	3	17	1	81.2903				N	N	Y	N
G2	H2-11-26	Atf3	UNKNOWN	SYBR	None	2.64154	1.19548	5.83678	23.938	24.3425	0.661002		3.21764	0.411962			-1.40138	TRUE	2.83516	TRUE	3	14	1	81.4829				Y	Y	Y	N
G3	H2R2-11-26	Atf3	UNKNOWN	SYBR	None	1.8124	1.56051	2.10495	24.284	24.3631	0.117966		3.76111	0.0777556			-0.857904	TRUE	2.83516	TRUE	3	15	1	81.4829				N	N	N	N
G4	H2R4-11-26	Atf3	UNKNOWN	SYBR	None	1.69062	0.920874	3.10377	25.2589	25.4224	0.458629		3.86147	0.315682			-0.757549	TRUE	2.83516	TRUE	3	16	1	81.4829				N	N	N	N
G5	H2R8-11-26	Atf3	UNKNOWN	SYBR	None	0.811843	0.523031	1.26013	25.9062	25.6723	0.351255		4.91975	0.228459			0.300728	TRUE	2.83516	TRUE	3	17	1	81.4829				N	N	N	N
G6	H2R24-11-26	Atf3	UNKNOWN	SYBR	None	1.68524	1.16184	2.44442	25.3224	25.1754	0.14832		3.86607	0.193247			-0.75295	TRUE	2.83516	TRUE	3	17	1	81.4829				N	N	N	N
G7	H4-11-26	Atf3	UNKNOWN	SYBR	None	4.60745	3.25414	6.52357	23.1311	23.365	0.264568		2.41505	0.180696			-2.20397	TRUE	2.83516	TRUE	3	14	1	81.4829				N	N	N	N
G8	H4R2-11-26	Atf3	UNKNOWN	SYBR	None	1.95792	1.24347	3.08287	24.7297	24.3478	0.388083		3.6497	0.235895			-0.969321	TRUE	2.83516	TRUE	3	17	1	81.2903				N	N	N	N
G9	H4R4-11-26	Atf3	UNKNOWN	SYBR	None	0.857389	0.70013	1.04997	25.8413	25.75	0.128999		4.841	0.0918562			0.221979	TRUE	2.83516	TRUE	3	17	1	81.2903				N	N	N	N
G10	H4R8-11-26	Atf3	UNKNOWN	SYBR	None	1.12046	0.935586	1.34187	25.8912	25.9268	0.0503753		4.45492	0.081746			-0.164094	TRUE	2.83516	TRUE	3	17	1	81.0977				N	N	N	N
G11	H4R24-11-26	Atf3	UNKNOWN	SYBR	None	1.53713	1.27065	1.85949	25.5239	25.5416	0.0249658		3.99878	0.086308			-0.620236	TRUE	2.83516	TRUE	3	18	1	80.9051				N	N	N	N
G12	H4-11-26	Atf3	UNKNOWN	SYBR	None	4.60745	3.25414	6.52357	23.6521	23.365	0.264568		2.41505	0.180696			-2.20397	TRUE	2.83516	TRUE	3	17	1	80.7126				N	N	N	N
H1	WT-CTR-11-26	Atf3	UNKNOWN	SYBR	None	1	0.730512	1.3689	25.4056	25.2165	0.19516		4.61902	0.163166			0	TRUE	2.83516	TRUE	3	17	1	81.2903				N	N	N	N
H2	H2-11-26	Atf3	UNKNOWN	SYBR	None	2.64154	1.19548	5.83678	25.1053	24.3425	0.661002		3.21764	0.411962			-1.40138	TRUE	2.83516	TRUE	3	16	1	81.2903				Y	N	N	N
H3	H2R2-11-26	Atf3	UNKNOWN	SYBR	None	1.8124	1.56051	2.10495	24.4987	24.3631	0.117966		3.76111	0.0777556			-0.857904	TRUE	2.83516	TRUE	3	16	1	81.2903				N	N	N	N
H4	H2R4-11-26	Atf3	UNKNOWN	SYBR	None	1.69062	0.920874	3.10377	25.9404	25.4224	0.458629		3.86147	0.315682			-0.757549	TRUE	2.83516	TRUE	3	18	1	81.2903				N	N	N	N
H5	H2R8-11-26	Atf3	UNKNOWN	SYBR	None	0.811843	0.523031	1.26013	25.2684	25.6723	0.351255		4.91975	0.228459			0.300728	TRUE	2.83516	TRUE	3	15	1	81.2903				N	N	N	N
H6	H2R24-11-26	Atf3	UNKNOWN	SYBR	None	1.68524	1.16184	2.44442	25.1781	25.1754	0.14832		3.86607	0.193247			-0.75295	TRUE	2.83516	TRUE	3	16	1	81.2903				N	N	N	N
H7	H4-11-26	Atf3	UNKNOWN	SYBR	None	4.60745	3.25414	6.52357	23.3118	23.365	0.264568		2.41505	0.180696			-2.20397	TRUE	2.83516	TRUE	3	16	1	81.2903				N	N	N	N
H8	H4R2-11-26	Atf3	UNKNOWN	SYBR	None	1.95792	1.24347	3.08287	24.3599	24.3478	0.388083		3.6497	0.235895			-0.969321	TRUE	2.83516	TRUE	3	15	1	81.0977				N	N	N	N
H9	H4R4-11-26	Atf3	UNKNOWN	SYBR	None	0.857389	0.70013	1.04997	25.6588	25.75	0.128999		4.841	0.0918562			0.221979	TRUE	2.83516	TRUE	3	17	1	81.0977				N	N	N	N
H10	H4R8-11-26	Atf3	UNKNOWN	SYBR	None	1.12046	0.935586	1.34187	25.9624	25.9268	0.0503753		4.45492	0.081746			-0.164094	TRUE	2.83516	TRUE	3	18	1	80.9051				N	N	N	N
H11	H4R24-11-26	Atf3	UNKNOWN	SYBR	None	1.53713	1.27065	1.85949	25.5592	25.5416	0.0249658		3.99878	0.086308			-0.620236	TRUE	2.83516	TRUE	3	17	1	80.9051				N	N	N	N
H12	H4R2-11-26	Atf3	UNKNOWN	SYBR	None	1.95792	1.24347	3.08287	23.9539	24.3478	0.388083		3.6497	0.235895			-0.969321	TRUE	2.83516	TRUE	3	14	1	80.7126				N	N	N	N

## Sheet: Sheet3
Block Type	96alum
Chemistry	SYBR_GREEN
Experiment File Name	D:\CWX\20211210.eds
Experiment Run End Time	2021-12-10 12:02:25 PM CST
Instrument Type	sds7500
Passive Reference	ROX
Well	Sample Name	Target Name	Task	Reporter	Quencher	RQ	RQ Min	RQ Max	Cт	Cт Mean	Cт SD	ΔCт	ΔCт Mean	ΔCт SE	HK Control ΔCт Mean	HK Control ΔCт SE	ΔΔCт	Automatic Ct Threshold	Ct Threshold	Automatic Baseline	Baseline Start	Baseline End	Efficiency	Tm1	Tm2	Tm3	Comments	NOISE	SPIKE	OUTLIERRG
A1	WT-CTR-11-26	Xbp1	UNKNOWN	SYBR	None	1	0.838502	1.1926	21.1576	21.1002	0.120602		-4.21713	0.0915248			0	TRUE	2.96743	TRUE	3	11	1	84.9925				N	Y	N
A2	H2-11-26	Xbp1	UNKNOWN	SYBR	None	2.21172	1.71943	2.84495	20.8431	20.5902	0.219056		-5.3623	0.130828			-1.14517	TRUE	2.96743	TRUE	3	11	1	84.9925				N	N	Y
A3	H2R2-11-26	Xbp1	UNKNOWN	SYBR	None	1.77179	1.30901	2.39817	20.9016	20.6783	0.193512		-5.04234	0.157297			-0.825209	TRUE	2.96743	TRUE	3	11	1	84.9925				N	N	N
A4	H2R4-11-26	Xbp1	UNKNOWN	SYBR	None	1.73034	1.07747	2.7788	21.3196	21.3224	0.0933099		-5.00818	0.246144			-0.791055	TRUE	2.96743	TRUE	3	13	1	84.9925				N	N	N
A5	H2R8-11-26	Xbp1	UNKNOWN	SYBR	None	1.25842	0.97686	1.62112	21.0871	21.2471	0.146353		-4.54874	0.131602			-0.331609	TRUE	2.96743	TRUE	3	12	1	84.9925				N	N	N
A6	H2R24-11-26	Xbp1	UNKNOWN	SYBR	None	3.07268	2.63073	3.58887	20.989	21.1333	0.137873		-5.83663	0.0806903			-1.6195	TRUE	2.96743	TRUE	3	11	1	84.9925				N	N	N
A7	H4-11-26	Xbp1	UNKNOWN	SYBR	None	3.53083	2.60622	4.78346	20.6586	20.6812	0.0874589		-6.03714	0.157773			-1.82001	TRUE	2.96743	TRUE	3	14	1	84.9925				N	N	N
A8	H4R2-11-26	Xbp1	UNKNOWN	SYBR	None	3.04723	2.55055	3.64063	20.4617	20.459	0.146004		-5.82463	0.0924526			-1.6075	TRUE	2.96743	TRUE	3	13	1	84.9925				N	N	N
A9	H4R4-11-26	Xbp1	UNKNOWN	SYBR	None	1.60711	1.14789	2.25005	20.9154	20.9156	0.227614		-4.9016	0.174858			-0.684473	TRUE	2.96743	TRUE	3	13	1	84.7988				N	N	N
A10	H4R8-11-26	Xbp1	UNKNOWN	SYBR	None	1.73176	1.36077	2.2039	21.793	21.6053	0.214639		-5.00937	0.125276			-0.792239	TRUE	2.96743	TRUE	3	11	1	84.7988				N	N	N
A11	H4R24-11-26	Xbp1	UNKNOWN	SYBR	None	2.30493	1.82298	2.91429	21.6926	21.7323	0.113802		-5.42185	0.12189			-1.20472	TRUE	2.96743	TRUE	3	13	1	84.6052				N	N	N
A12	H4R24-11-26	Xbp1	UNKNOWN	SYBR	None	2.30493	1.82298	2.91429	21.8607	21.7323	0.113802		-5.42185	0.12189			-1.20472	TRUE	2.96743	TRUE	3	12	1	84.4116				N	N	N
B1	WT-CTR-11-26	Xbp1	UNKNOWN	SYBR	None	1	0.838502	1.1926	21.1813	21.1002	0.120602		-4.21713	0.0915248			0	TRUE	2.96743	TRUE	3	6	1	85.1861				N	N	N
B2	H2-11-26	Xbp1	UNKNOWN	SYBR	None	2.21172	1.71943	2.84495	20.4589	20.5902	0.219056		-5.3623	0.130828			-1.14517	TRUE	2.96743	TRUE	3	12	1	85.1861				N	N	N
B3	H2R2-11-26	Xbp1	UNKNOWN	SYBR	None	1.77179	1.30901	2.39817	20.5611	20.6783	0.193512		-5.04234	0.157297			-0.825209	TRUE	2.96743	TRUE	3	11	1	85.1861				N	N	N
B4	H2R4-11-26	Xbp1	UNKNOWN	SYBR	None	1.73034	1.07747	2.7788	21.2305	21.3224	0.0933099		-5.00818	0.246144			-0.791055	TRUE	2.96743	TRUE	3	14	1	85.1861				N	N	N
B5	H2R8-11-26	Xbp1	UNKNOWN	SYBR	None	1.25842	0.97686	1.62112	21.3743	21.2471	0.146353		-4.54874	0.131602			-0.331609	TRUE	2.96743	TRUE	3	11	1	85.1861				N	N	N
B6	H2R24-11-26	Xbp1	UNKNOWN	SYBR	None	3.07268	2.63073	3.58887	21.1471	21.1333	0.137873		-5.83663	0.0806903			-1.6195	TRUE	2.96743	TRUE	3	9	1	85.1861				N	N	N
B7	H4-11-26	Xbp1	UNKNOWN	SYBR	None	3.53083	2.60622	4.78346	20.6073	20.6812	0.0874589		-6.03714	0.157773			-1.82001	TRUE	2.96743	TRUE	3	11	1	84.9925				N	N	N
B8	H4R2-11-26	Xbp1	UNKNOWN	SYBR	None	3.04723	2.55055	3.64063	20.3117	20.459	0.146004		-5.82463	0.0924526			-1.6075	TRUE	2.96743	TRUE	3	12	1	85.1861				N	N	N
B9	H4R4-11-26	Xbp1	UNKNOWN	SYBR	None	1.60711	1.14789	2.25005	21.1433	20.9156	0.227614		-4.9016	0.174858			-0.684473	TRUE	2.96743	TRUE	3	15	1	84.9925				N	N	N
B10	H4R8-11-26	Xbp1	UNKNOWN	SYBR	None	1.73176	1.36077	2.2039	21.3713	21.6053	0.214639		-5.00937	0.125276			-0.792239	TRUE	2.96743	TRUE	3	13	1	84.9925				N	N	N
B11	WT-CTR-11-26	Casp8	UNKNOWN	SYBR	None	1	0.827481	1.20849	24.7981	24.7952	0.135875		-0.522049	0.0984			0	TRUE	2.6934	TRUE	3	15	1	82.6688				N	N	N
B12	H2-11-26	Casp8	UNKNOWN	SYBR	None	0.920462	0.680747	1.24459	25.25	25.55	0.265255		-0.402479	0.156761			0.11957	TRUE	2.6934	TRUE	3	17	1	82.4751				N	N	N
C1	WT-CTR-11-26	Xbp1	UNKNOWN	SYBR	None	1	0.838502	1.1926	20.9616	21.1002	0.120602		-4.21713	0.0915248			0	TRUE	2.96743	TRUE	3	12	1	85.1861				N	Y	N
C2	H2-11-26	Xbp1	UNKNOWN	SYBR	None	2.21172	1.71943	2.84495	20.4686	20.5902	0.219056		-5.3623	0.130828			-1.14517	TRUE	2.96743	TRUE	3	11	1	85.1861				N	N	N
C3	H2R2-11-26	Xbp1	UNKNOWN	SYBR	None	1.77179	1.30901	2.39817	20.572	20.6783	0.193512		-5.04234	0.157297			-0.825209	TRUE	2.96743	TRUE	3	11	1	85.3798				N	N	N
C4	H2R4-11-26	Xbp1	UNKNOWN	SYBR	None	1.73034	1.07747	2.7788	21.417	21.3224	0.0933099		-5.00818	0.246144			-0.791055	TRUE	2.96743	TRUE	3	11	1	85.3798				N	N	N
C5	H2R8-11-26	Xbp1	UNKNOWN	SYBR	None	1.25842	0.97686	1.62112	21.28	21.2471	0.146353		-4.54874	0.131602			-0.331609	TRUE	2.96743	TRUE	3	13	1	85.3798				N	N	N
C6	H2R24-11-26	Xbp1	UNKNOWN	SYBR	None	3.07268	2.63073	3.58887	21.2637	21.1333	0.137873		-5.83663	0.0806903			-1.6195	TRUE	2.96743	TRUE	3	10	1	85.3798				N	N	N
C7	H4-11-26	Xbp1	UNKNOWN	SYBR	None	3.53083	2.60622	4.78346	20.7778	20.6812	0.0874589		-6.03714	0.157773			-1.82001	TRUE	2.96743	TRUE	3	13	1	85.3798				N	N	N
C8	H4R2-11-26	Xbp1	UNKNOWN	SYBR	None	3.04723	2.55055	3.64063	20.6036	20.459	0.146004		-5.82463	0.0924526			-1.6075	TRUE	2.96743	TRUE	3	13	1	85.1861				N	N	N
C9	H4R4-11-26	Xbp1	UNKNOWN	SYBR	None	1.60711	1.14789	2.25005	20.6881	20.9156	0.227614		-4.9016	0.174858			-0.684473	TRUE	2.96743	TRUE	3	13	1	85.1861				N	N	N
C10	H4R8-11-26	Xbp1	UNKNOWN	SYBR	None	1.73176	1.36077	2.2039	21.6516	21.6053	0.214639		-5.00937	0.125276			-0.792239	TRUE	2.96743	TRUE	3	14	1	84.9925				N	N	N
C11	H4R24-11-26	Xbp1	UNKNOWN	SYBR	None	2.30493	1.82298	2.91429	21.6438	21.7323	0.113802		-5.42185	0.12189			-1.20472	TRUE	2.96743	TRUE	3	13	1	84.7988				N	N	N
C12	H2R2-11-26	Casp8	UNKNOWN	SYBR	None	0.895426	0.704488	1.13811	25.3848	25.3579	0.0990427		-0.362694	0.12462			0.159355	TRUE	2.6934	TRUE	3	16	1	82.6688				N	N	N
D1	WT-CTR-11-26	Cd44	UNKNOWN	SYBR	None				25.2528	25.3173	0.102886							TRUE	2.2176	TRUE	3	17	1	80.926				N	N	N
D2	H2-11-26	Cd44	UNKNOWN	SYBR	None				25.972	25.9525	0.0579839							TRUE	2.2176	TRUE	3	17	1	80.926				N	N	N
D3	H2R2-11-26	Cd44	UNKNOWN	SYBR	None				25.7469	25.7206	0.191783							TRUE	2.2176	TRUE	3	19	1	80.926				N	N	N
D4	H2R4-11-26	Cd44	UNKNOWN	SYBR	None				26.0041	26.3305	0.415998							TRUE	2.2176	TRUE	3	17	1	80.926				N	N	N
D5	H2R8-11-26	Cd44	UNKNOWN	SYBR	None				25.8999	25.7959	0.174751							TRUE	2.2176	TRUE	3	20	1	80.926				N	N	N
D6	H2R24-11-26	Cd44	UNKNOWN	SYBR	None				26.9853	26.9699	0.0228858							TRUE	2.2176	TRUE	3	19	1	80.926				N	N	N
D7	H4-11-26	Cd44	UNKNOWN	SYBR	None				26.7391	26.7184	0.258897							TRUE	2.2176	TRUE	3	21	1	80.926				N	N	N
D8	H4R2-11-26	Cd44	UNKNOWN	SYBR	None				26.3399	26.2836	0.0657665							TRUE	2.2176	TRUE	3	19	1	80.926				N	N	N
D9	H4R4-11-26	Cd44	UNKNOWN	SYBR	None				25.9331	25.8172	0.199795							TRUE	2.2176	TRUE	3	18	1	80.7324				N	N	N
D10	H4R8-11-26	Cd44	UNKNOWN	SYBR	None				26.6136	26.6147	0.0318091							TRUE	2.2176	TRUE	3	19	1	80.5387				N	N	N
D11	H4R24-11-26	Cd44	UNKNOWN	SYBR	None				27.0541	27.1542	0.177821							TRUE	2.2176	TRUE	3	19	1	80.3451				N	N	N
D12	H2R4-11-26	Casp8	UNKNOWN	SYBR	None	1.68129	0.884803	3.19476	24.5988	25.0589	0.40094		-1.27162	0.33357			-0.749567	TRUE	2.6934	TRUE	3	18	1	82.6688				N	N	N
E1	WT-CTR-11-26	Cd44	UNKNOWN	SYBR	None				25.2631	25.3173	0.102886							TRUE	2.2176	TRUE	3	16	1	80.926				N	N	N
E2	H2-11-26	Cd44	UNKNOWN	SYBR	None				25.9983	25.9525	0.0579839							TRUE	2.2176	TRUE	3	19	1	80.926				N	N	N
E3	H2R2-11-26	Cd44	UNKNOWN	SYBR	None				25.517	25.7206	0.191783							TRUE	2.2176	TRUE	3	17	1	80.926				N	N	N
E4	H2R4-11-26	Cd44	UNKNOWN	SYBR	None				26.1886	26.3305	0.415998							TRUE	2.2176	TRUE	3	19	1	80.926				N	N	N
E5	H2R8-11-26	Cd44	UNKNOWN	SYBR	None				25.5941	25.7959	0.174751							TRUE	2.2176	TRUE	3	18	1	81.1197				N	N	N
E6	H2R24-11-26	Cd44	UNKNOWN	SYBR	None				26.9807	26.9699	0.0228858							TRUE	2.2176	TRUE	3	20	1	80.926				N	N	N
E7	H4-11-26	Cd44	UNKNOWN	SYBR	None				26.9663	26.7184	0.258897							TRUE	2.2176	TRUE	3	19	1	80.926				N	N	N
E8	H4R2-11-26	Cd44	UNKNOWN	SYBR	None				26.2113	26.2836	0.0657665							TRUE	2.2176	TRUE	3	19	1	80.7324				N	N	N
E9	H4R4-11-26	Cd44	UNKNOWN	SYBR	None				25.932	25.8172	0.199795							TRUE	2.2176	TRUE	3	17	1	80.7324				N	N	N
E10	H4R8-11-26	Cd44	UNKNOWN	SYBR	None				26.647	26.6147	0.0318091							TRUE	2.2176	TRUE	3	18	1	80.5387				N	N	N
E11	H4R24-11-26	Cd44	UNKNOWN	SYBR	None				27.3595	27.1542	0.177821							TRUE	2.2176	TRUE	3	19	1	80.3451				N	N	N
E12	H2R8-11-26	Casp8	UNKNOWN	SYBR	None	1.18111	0.788429	1.76936	25.3943	25.0337	0.319025		-0.762188	0.210012			-0.240139	TRUE	2.6934	TRUE	3	17	1	82.6688				N	N	N
F1	WT-CTR-11-26	Cd44	UNKNOWN	SYBR	None				25.4359	25.3173	0.102886							TRUE	2.2176	TRUE	3	17	1	80.7324				N	N	N
F2	H2-11-26	Cd44	UNKNOWN	SYBR	None				25.8873	25.9525	0.0579839							TRUE	2.2176	TRUE	3	18	1	80.926				N	N	N
F3	H2R2-11-26	Cd44	UNKNOWN	SYBR	None				25.8979	25.7206	0.191783							TRUE	2.2176	TRUE	3	19	1	80.926				N	N	N
F4	H2R4-11-26	Cd44	UNKNOWN	SYBR	None				26.7989	26.3305	0.415998							TRUE	2.2176	TRUE	3	19	1	80.926				N	N	N
F5	H2R8-11-26	Cd44	UNKNOWN	SYBR	None				25.8936	25.7959	0.174751							TRUE	2.2176	TRUE	3	18	1	80.926				N	N	N
F6	H2R24-11-26	Cd44	UNKNOWN	SYBR	None				26.9436	26.9699	0.0228858							TRUE	2.2176	TRUE	3	19	1	80.926				N	N	N
F7	H4-11-26	Cd44	UNKNOWN	SYBR	None				26.4497	26.7184	0.258897							TRUE	2.2176	TRUE	3	20	1	80.926				N	N	N
F8	H4R2-11-26	Cd44	UNKNOWN	SYBR	None				26.2996	26.2836	0.0657665							TRUE	2.2176	TRUE	3	19	1	80.7324				N	N	N
F9	H4R4-11-26	Cd44	UNKNOWN	SYBR	None				25.5865	25.8172	0.199795							TRUE	2.2176	TRUE	3	18	1	80.7324				N	N	N
F10	H4R8-11-26	Cd44	UNKNOWN	SYBR	None				26.5834	26.6147	0.0318091							TRUE	2.2176	TRUE	3	18	1	80.5387				N	N	N
F11	H4R24-11-26	Cd44	UNKNOWN	SYBR	None				27.049	27.1542	0.177821							TRUE	2.2176	TRUE	3	19	1	80.3451				N	Y	N
F12	H2R24-11-26	Casp8	UNKNOWN	SYBR	None	2.12527	1.58051	2.8578	25.5789	25.3602	0.265554		-1.6097	0.153886			-1.08765	TRUE	2.6934	TRUE	3	17	1	82.6688				N	Y	N
G1	WT-CTR-11-26	Casp8	UNKNOWN	SYBR	None	1	0.827481	1.20849	24.6579	24.7952	0.135875		-0.522049	0.0984			0	TRUE	2.6934	TRUE	3	16	1	83.0561				N	N	N
G2	H2-11-26	Casp8	UNKNOWN	SYBR	None	0.920462	0.680747	1.24459	25.6465	25.55	0.265255		-0.402479	0.156761			0.11957	TRUE	2.6934	TRUE	3	16	1	83.2497				Y	Y	N
G3	H2R2-11-26	Casp8	UNKNOWN	SYBR	None	0.895426	0.704488	1.13811	25.2482	25.3579	0.0990427		-0.362694	0.12462			0.159355	TRUE	2.6934	TRUE	3	17	1	83.2497				N	N	N
G4	H2R4-11-26	Casp8	UNKNOWN	SYBR	None	1.68129	0.884803	3.19476	25.2448	25.0589	0.40094		-1.27162	0.33357			-0.749567	TRUE	2.6934	TRUE	3	16	1	83.2497				N	Y	N
G5	H2R8-11-26	Casp8	UNKNOWN	SYBR	None	1.18111	0.788429	1.76936	24.9184	25.0337	0.319025		-0.762188	0.210012			-0.240139	TRUE	2.6934	TRUE	3	15	1	83.2497				N	N	N
G6	H2R24-11-26	Casp8	UNKNOWN	SYBR	None	2.12527	1.58051	2.8578	25.0647	25.3602	0.265554		-1.6097	0.153886			-1.08765	TRUE	2.6934	TRUE	3	16	1	83.2497				N	N	N
G7	H4-11-26	Casp8	UNKNOWN	SYBR	None	1.31852	0.93421	1.86091	25.719	25.7974	0.170699		-0.920963	0.17904			-0.398914	TRUE	2.6934	TRUE	3	18	1	83.2497				N	N	N
G8	H4R2-11-26	Casp8	UNKNOWN	SYBR	None	0.750629	0.54008	1.04326	25.9641	26.1754	0.288886		-0.108221	0.171056			0.413828	TRUE	2.6934	TRUE	3	17	1	83.0561				N	N	N
G9	H4R4-11-26	Casp8	UNKNOWN	SYBR	None	1.09576	0.820588	1.46321	25.1009	25.1632	0.0880889		-0.653981	0.131095			-0.131932	TRUE	2.6934	TRUE	3	18	1	83.0561				N	N	N
G10	H4R8-11-26	Casp8	UNKNOWN	SYBR	None	1.7119	1.44045	2.0345	25.3931	25.317	0.107594		-1.29764	0.0782655			-0.775596	TRUE	2.6934	TRUE	3	17	1	82.8624				N	N	N
G11	H4R24-11-26	Casp8	UNKNOWN	SYBR	None	2.1289	1.69561	2.67292	25.5521	25.542	0.0142922		-1.61216	0.103161			-1.09011	TRUE	2.6934	TRUE	3	18	1	82.8624				N	N	N
G12	H4-11-26	Casp8	UNKNOWN	SYBR	None	1.31852	0.93421	1.86091	25.9932	25.7974	0.170699		-0.920963	0.17904			-0.398914	TRUE	2.6934	TRUE	3	19	1	82.6688				N	N	N
H1	WT-CTR-11-26	Casp8	UNKNOWN	SYBR	None	1	0.827481	1.20849	24.9297	24.7952	0.135875		-0.522049	0.0984			0	TRUE	2.6934	TRUE	3	16	1	83.0561				N	Y	N
H2	H2-11-26	Casp8	UNKNOWN	SYBR	None	0.920462	0.680747	1.24459	25.7536	25.55	0.265255		-0.402479	0.156761			0.11957	TRUE	2.6934	TRUE	3	18	1	83.0561				N	N	N
H3	H2R2-11-26	Casp8	UNKNOWN	SYBR	None	0.895426	0.704488	1.13811	25.4407	25.3579	0.0990427		-0.362694	0.12462			0.159355	TRUE	2.6934	TRUE	3	17	1	83.0561				N	N	N
H4	H2R4-11-26	Casp8	UNKNOWN	SYBR	None	1.68129	0.884803	3.19476	25.3332	25.0589	0.40094		-1.27162	0.33357			-0.749567	TRUE	2.6934	TRUE	3	17	1	83.0561				N	N	N
H5	H2R8-11-26	Casp8	UNKNOWN	SYBR	None	1.18111	0.788429	1.76936	24.7883	25.0337	0.319025		-0.762188	0.210012			-0.240139	TRUE	2.6934	TRUE	3	18	1	83.0561				N	N	N
H6	H2R24-11-26	Casp8	UNKNOWN	SYBR	None	2.12527	1.58051	2.8578	25.4369	25.3602	0.265554		-1.6097	0.153886			-1.08765	TRUE	2.6934	TRUE	3	18	1	83.0561				N	N	N
H7	H4-11-26	Casp8	UNKNOWN	SYBR	None	1.31852	0.93421	1.86091	25.68	25.7974	0.170699		-0.920963	0.17904			-0.398914	TRUE	2.6934	TRUE	3	18	1	83.0561				N	N	N
H8	H4R2-11-26	Casp8	UNKNOWN	SYBR	None	0.750629	0.54008	1.04326	26.0575	26.1754	0.288886		-0.108221	0.171056			0.413828	TRUE	2.6934	TRUE	3	17	1	82.8624				N	N	N
H9	H4R4-11-26	Casp8	UNKNOWN	SYBR	None	1.09576	0.820588	1.46321	25.2255	25.1632	0.0880889		-0.653981	0.131095			-0.131932	TRUE	2.6934	TRUE	3	17	1	82.8624				N	N	N
H10	H4R8-11-26	Casp8	UNKNOWN	SYBR	None	1.7119	1.44045	2.0345	25.241	25.317	0.107594		-1.29764	0.0782655			-0.775596	TRUE	2.6934	TRUE	3	18	1	82.6688				N	N	N
H11	H4R24-11-26	Casp8	UNKNOWN	SYBR	None	2.1289	1.69561	2.67292	25.5319	25.542	0.0142922		-1.61216	0.103161			-1.09011	TRUE	2.6934	TRUE	3	17	1	82.6688				N	N	N
H12	H4R2-11-26	Casp8	UNKNOWN	SYBR	None	0.750629	0.54008	1.04326	26.5046	26.1754	0.288886		-0.108221	0.171056			0.413828	TRUE	2.6934	TRUE	3	16	1	82.4751				N	N	N
Analysis Type	Singleplex
Endogenous Control	Cd44
RQ Min/Max Confidence Level	95.0
Reference Sample	WT-CTR-11-26

## Sheet: Sheet4
Block Type	96alum
Chemistry	SYBR_GREEN
Experiment File Name	D:\CWX\20211210-2.eds
Experiment Run End Time	2021-12-10 16:30:59 PM CST
Instrument Type	sds7500
Passive Reference	ROX
Well	Sample Name	Target Name	Task	Reporter	Quencher	RQ	RQ Min	RQ Max	Cт	Cт Mean	Cт SD	ΔCт	ΔCт Mean	ΔCт SE	HK Control ΔCт Mean	HK Control ΔCт SE	ΔΔCт	Automatic Ct Threshold	Ct Threshold	Automatic Baseline	Baseline Start	Baseline End	Efficiency	Tm1	Tm2	Tm3	Comments	HIGHSD	NOISE	SPIKE	OUTLIERRG	MTP
A1	WT-CTR-11-26	Tnf	UNKNOWN	SYBR	None	1	0.124428	8.03679	33.0157	32.8499	1.67508		10.5495	1.0829			0	TRUE	0.52426	TRUE	3	26	1	84.0179				Y	N	N	N	N
A2	H2-11-26	Tnf	UNKNOWN	SYBR	None	33.5379	21.7678	51.6723	27.9809	27.6417	0.316069		5.48177	0.224603			-5.06772	TRUE	0.52426	TRUE	3	22	1	84.2116				N	N	N	N	N
A3	H2R2-11-26	Tnf	UNKNOWN	SYBR	None	19.0788	14.4057	25.2678	28.5175	28.6314	0.119406		6.29559	0.145988			-4.2539	TRUE	0.52426	TRUE	3	24	1	84.4052				N	N	N	N	N
A4	H2R4-11-26	Tnf	UNKNOWN	SYBR	None	4.13603	2.87592	5.94826	30.4477	30.779	0.299184		8.50124	0.18881			-2.04825	TRUE	0.52426	TRUE	3	25	1	84.0179				N	N	N	N	N
A5	H2R8-11-26	Tnf	UNKNOWN	SYBR	None	0.770455	0.353886	1.67738	32.28	32.9266	0.698115		10.9257	0.404267			0.376217	TRUE	0.52426	TRUE	3	25	1	84.0179				Y	N	N	N	N
A6	H2R24-11-26	Tnf	UNKNOWN	SYBR	None	0.994445	0.284235	3.47924	31.8481	32.9616	0.964384		10.5575	0.650764			0.00803693	TRUE	0.52426	TRUE	3	26	1	84.9861	80.1451			Y	N	N	Y	Y
A7	H4-11-26	Tnf	UNKNOWN	SYBR	None	16.6303	11.0254	25.0845	28.8585	29.0914	0.339732		6.49375	0.213577			-4.05574	TRUE	0.52426	TRUE	3	24	1	84.2116				N	N	N	N	N
A8	H4R2-11-26	Tnf	UNKNOWN	SYBR	None	15.8053	8.00757	31.1964	28.6375	29.0426	0.352		6.56716	0.353319			-3.98234	TRUE	0.52426	TRUE	3	22	1	84.2116				N	N	N	N	N
A9	H4R4-11-26	Tnf	UNKNOWN	SYBR	None	2.17022	1.48407	3.1736	31.703	31.5061	0.199202		9.43165	0.197476			-1.11784	TRUE	0.52426	TRUE	3	25	1	84.0179				N	N	N	N	N
A10	H4R8-11-26	Tnf	UNKNOWN	SYBR	None	2.14799	0.955368	4.8294	31.6591	31.7898	0.454116		9.44651	0.420991			-1.10299	TRUE	0.52426	TRUE	3	27	1	83.6306	79.7578			N	N	N	N	Y
A11	H4R24-11-26	Tnf	UNKNOWN	SYBR	None	0.269851	0.0176642	4.12244	35.4411	34.9507	2.37991		12.4393	1.41665			1.88976	TRUE	0.52426	TRUE	3	31	1	83.6306	68.1393			Y	N	N	N	Y
A12	H2R4-11-26	Hmox1	UNKNOWN	SYBR	None	2.99964	1.76089	5.10981	22.5518	22.0398	0.460863		-0.23794	0.276786			-1.58479	TRUE	2.56038	TRUE	3	13	1	82.8561				N	N	N	N	N
B1	WT-CTR-11-26	Tnf	UNKNOWN	SYBR	None	1	0.124428	8.03679	34.4359	32.8499	1.67508		10.5495	1.0829			0	TRUE	0.52426	TRUE	3	29	1	84.0179				Y	N	N	N	N
B2	H2-11-26	Tnf	UNKNOWN	SYBR	None	33.5379	21.7678	51.6723	27.3554	27.6417	0.316069		5.48177	0.224603			-5.06772	TRUE	0.52426	TRUE	3	22	1	84.4052				N	N	N	N	N
B3	H2R2-11-26	Tnf	UNKNOWN	SYBR	None	19.0788	14.4057	25.2678	28.7557	28.6314	0.119406		6.29559	0.145988			-4.2539	TRUE	0.52426	TRUE	3	24	1	84.4052				N	N	N	N	N
B4	H2R4-11-26	Tnf	UNKNOWN	SYBR	None	4.13603	2.87592	5.94826	31.0293	30.779	0.299184		8.50124	0.18881			-2.04825	TRUE	0.52426	TRUE	3	24	1	84.4052				N	N	N	N	N
B5	H2R8-11-26	Tnf	UNKNOWN	SYBR	None	0.770455	0.353886	1.67738	32.833	32.9266	0.698115		10.9257	0.404267			0.376217	TRUE	0.52426	TRUE	3	28	1	84.4052				Y	N	N	N	N
B6	H2R24-11-26	Tnf	UNKNOWN	SYBR	None	0.994445	0.284235	3.47924	33.5078	32.9616	0.964384		10.5575	0.650764			0.00803693	TRUE	0.52426	TRUE	3	25	1	84.4052				Y	N	N	N	N
B7	H4-11-26	Tnf	UNKNOWN	SYBR	None	16.6303	11.0254	25.0845	29.4813	29.0914	0.339732		6.49375	0.213577			-4.05574	TRUE	0.52426	TRUE	3	24	1	84.4052				N	N	N	N	N
B8	H4R2-11-26	Tnf	UNKNOWN	SYBR	None	15.8053	8.00757	31.1964	29.2736	29.0426	0.352		6.56716	0.353319			-3.98234	TRUE	0.52426	TRUE	3	24	1	84.4052				N	N	N	N	N
B9	H4R4-11-26	Tnf	UNKNOWN	SYBR	None	2.17022	1.48407	3.1736	31.3047	31.5061	0.199202		9.43165	0.197476			-1.11784	TRUE	0.52426	TRUE	3	26	1	84.2116				N	N	N	N	N
B10	H4R8-11-26	Tnf	UNKNOWN	SYBR	None	2.14799	0.955368	4.8294	32.2949	31.7898	0.454116		9.44651	0.420991			-1.10299	TRUE	0.52426	TRUE	3	26	1	84.0179				N	N	N	N	N
B11	H4R24-11-26	Tnf	UNKNOWN	SYBR	None	0.269851	0.0176642	4.12244	37.0473	34.9507	2.37991		12.4393	1.41665			1.88976	TRUE	0.52426	TRUE	3	30	1	83.6306				Y	N	N	N	N
B12	H2R8-11-26	Hmox1	UNKNOWN	SYBR	None	0.805821	0.564607	1.15009	23.5125	23.6592	0.315549		1.65831	0.184846			0.311468	TRUE	2.56038	TRUE	3	15	1	82.8561				N	N	N	N	N
C1	WT-CTR-11-26	Tnf	UNKNOWN	SYBR	None	1	0.124428	8.03679	31.098	32.8499	1.67508		10.5495	1.0829			0	TRUE	0.52426	TRUE	3	24	1	85.1798	79.9514			Y	N	Y	N	Y
C2	H2-11-26	Tnf	UNKNOWN	SYBR	None	33.5379	21.7678	51.6723	27.5889	27.6417	0.316069		5.48177	0.224603			-5.06772	TRUE	0.52426	TRUE	3	22	1	84.5988				N	N	N	N	N
C3	H2R2-11-26	Tnf	UNKNOWN	SYBR	None	19.0788	14.4057	25.2678	28.621	28.6314	0.119406		6.29559	0.145988			-4.2539	TRUE	0.52426	TRUE	3	21	1	84.5988				N	N	N	N	N
C4	H2R4-11-26	Tnf	UNKNOWN	SYBR	None	4.13603	2.87592	5.94826	30.8601	30.779	0.299184		8.50124	0.18881			-2.04825	TRUE	0.52426	TRUE	3	24	1	84.5988				N	N	N	N	N
C5	H2R8-11-26	Tnf	UNKNOWN	SYBR	None	0.770455	0.353886	1.67738	33.6668	32.9266	0.698115		10.9257	0.404267			0.376217	TRUE	0.52426	TRUE	3	26	1	84.7925				Y	N	N	N	N
C6	H2R24-11-26	Tnf	UNKNOWN	SYBR	None	0.994445	0.284235	3.47924	33.529	32.9616	0.964384		10.5575	0.650764			0.00803693	TRUE	0.52426	TRUE	3	28	1	88.0844				Y	N	N	N	N
C7	H4-11-26	Tnf	UNKNOWN	SYBR	None	16.6303	11.0254	25.0845	28.9346	29.0914	0.339732		6.49375	0.213577			-4.05574	TRUE	0.52426	TRUE	3	24	1	84.5988				N	N	N	N	N
C8	H4R2-11-26	Tnf	UNKNOWN	SYBR	None	15.8053	8.00757	31.1964	29.2167	29.0426	0.352		6.56716	0.353319			-3.98234	TRUE	0.52426	TRUE	3	23	1	84.4052				N	N	N	N	N
C9	H4R4-11-26	Tnf	UNKNOWN	SYBR	None	2.17022	1.48407	3.1736	31.5104	31.5061	0.199202		9.43165	0.197476			-1.11784	TRUE	0.52426	TRUE	3	26	1	84.2116	80.5324			N	N	N	N	Y
C10	H4R8-11-26	Tnf	UNKNOWN	SYBR	None	2.14799	0.955368	4.8294	31.4154	31.7898	0.454116		9.44651	0.420991			-1.10299	TRUE	0.52426	TRUE	3	26	1	84.2116				N	N	N	N	N
C11	H4R24-11-26	Tnf	UNKNOWN	SYBR	None	0.269851	0.0176642	4.12244	32.3638	34.9507	2.37991		12.4393	1.41665			1.88976	TRUE	0.52426	TRUE	3	25	1	77.8214	84.5988			Y	N	N	N	Y
C12	H2R24-11-26	Hmox1	UNKNOWN	SYBR	None	1.48707	0.736675	3.00182	23.4362	23.1785	0.243322		0.774377	0.364988			-0.572469	TRUE	2.56038	TRUE	3	15	1	83.0497				N	N	N	N	N
D1	WT-CTR-11-26	Src	UNKNOWN	SYBR	None				21.6688	22.3004	0.843889							TRUE	1.68676	TRUE	3	13	1	85.1798				Y	N	N	N	N
D2	H2-11-26	Src	UNKNOWN	SYBR	None				21.9658	22.1599	0.226804							TRUE	1.68676	TRUE	3	15	1	85.1798				N	N	N	N	N
D3	H2R2-11-26	Src	UNKNOWN	SYBR	None				22.3838	22.3358	0.222889							TRUE	1.68676	TRUE	3	15	1	85.1798				N	N	N	N	N
D4	H2R4-11-26	Src	UNKNOWN	SYBR	None				22.1254	22.2778	0.13205							TRUE	1.68676	TRUE	3	15	1	85.1798				N	N	N	N	N
D5	H2R8-11-26	Src	UNKNOWN	SYBR	None				21.9395	22.0009	0.0541528							TRUE	1.68676	TRUE	3	15	1	85.3734				N	N	N	N	N
D6	H2R24-11-26	Src	UNKNOWN	SYBR	None				21.7851	22.4041	0.583475							TRUE	1.68676	TRUE	3	15	1	85.3734				Y	N	N	N	N
D7	H4-11-26	Src	UNKNOWN	SYBR	None				22.4316	22.5977	0.146383							TRUE	1.68676	TRUE	3	15	1	85.1798				N	N	N	N	N
D8	H4R2-11-26	Src	UNKNOWN	SYBR	None				22.0921	22.4754	0.500599							TRUE	1.68676	TRUE	3	13	1	85.1798				Y	N	N	N	N
D9	H4R4-11-26	Src	UNKNOWN	SYBR	None				22.3214	22.0744	0.278045							TRUE	1.68676	TRUE	3	15	1	84.9861				N	N	N	N	N
D10	H4R8-11-26	Src	UNKNOWN	SYBR	None				21.7665	22.3433	0.570507							TRUE	1.68676	TRUE	3	14	1	84.9861				Y	N	Y	N	N
D11	H4R24-11-26	Src	UNKNOWN	SYBR	None				23.1581	22.5115	0.597295							TRUE	1.68676	TRUE	3	14	1	84.7925				Y	N	N	N	N
D12	H4-11-26	Hmox1	UNKNOWN	SYBR	None	1.46564	0.969735	2.21513	23.7874	23.393	0.341687		0.795319	0.214614			-0.551527	TRUE	2.56038	TRUE	3	14	1	83.0497				N	N	N	N	N
E1	WT-CTR-11-26	Src	UNKNOWN	SYBR	None				23.2588	22.3004	0.843889							TRUE	1.68676	TRUE	3	15	1	85.3734				Y	N	N	N	N
E2	H2-11-26	Src	UNKNOWN	SYBR	None				22.4092	22.1599	0.226804							TRUE	1.68676	TRUE	3	15	1	85.1798				N	N	N	N	N
E3	H2R2-11-26	Src	UNKNOWN	SYBR	None				22.0928	22.3358	0.222889							TRUE	1.68676	TRUE	3	15	1	85.1798				N	N	N	N	N
E4	H2R4-11-26	Src	UNKNOWN	SYBR	None				22.3503	22.2778	0.13205							TRUE	1.68676	TRUE	3	16	1	85.3734				N	N	N	N	N
E5	H2R8-11-26	Src	UNKNOWN	SYBR	None				22.042	22.0009	0.0541528							TRUE	1.68676	TRUE	3	14	1	85.3734				N	N	N	N	N
E6	H2R24-11-26	Src	UNKNOWN	SYBR	None				22.9439	22.4041	0.583475							TRUE	1.68676	TRUE	3	13	1	85.3734				Y	N	N	N	N
E7	H4-11-26	Src	UNKNOWN	SYBR	None				22.7078	22.5977	0.146383							TRUE	1.68676	TRUE	3	14	1	85.1798				N	N	N	N	N
E8	H4R2-11-26	Src	UNKNOWN	SYBR	None				22.2925	22.4754	0.500599							TRUE	1.68676	TRUE	3	15	1	85.1798				Y	N	Y	N	N
E9	H4R4-11-26	Src	UNKNOWN	SYBR	None				21.7733	22.0744	0.278045							TRUE	1.68676	TRUE	3	15	1	84.9861				N	N	N	N	N
E10	H4R8-11-26	Src	UNKNOWN	SYBR	None				22.3561	22.3433	0.570507							TRUE	1.68676	TRUE	3	17	1	84.9861				Y	N	N	N	N
E11	H4R24-11-26	Src	UNKNOWN	SYBR	None				22.396	22.5115	0.597295							TRUE	1.68676	TRUE	3	14	1	84.7925				Y	N	N	N	N
E12	H4R2-11-26	Hmox1	UNKNOWN	SYBR	None	8.1464	3.51292	18.8913	20.8751	20.7961	0.567874		-1.67932	0.437066			-3.02616	TRUE	2.56038	TRUE	3	13	1	83.0497				Y	N	N	N	N
F1	WT-CTR-11-26	Src	UNKNOWN	SYBR	None				21.9736	22.3004	0.843889							TRUE	1.68676	TRUE	3	15	1	85.1798				Y	N	N	N	N
F2	H2-11-26	Src	UNKNOWN	SYBR	None				22.1047	22.1599	0.226804							TRUE	1.68676	TRUE	3	16	1	85.1798				N	N	N	N	N
F3	H2R2-11-26	Src	UNKNOWN	SYBR	None				22.5308	22.3358	0.222889							TRUE	1.68676	TRUE	3	13	1	85.1798				N	N	N	N	N
F4	H2R4-11-26	Src	UNKNOWN	SYBR	None				22.3577	22.2778	0.13205							TRUE	1.68676	TRUE	3	15	1	85.1798				N	N	N	N	N
F5	H2R8-11-26	Src	UNKNOWN	SYBR	None				22.0212	22.0009	0.0541528							TRUE	1.68676	TRUE	3	15	1	85.1798				N	N	N	N	N
F6	H2R24-11-26	Src	UNKNOWN	SYBR	None				22.4834	22.4041	0.583475							TRUE	1.68676	TRUE	3	15	1	85.1798				Y	N	N	N	N
F7	H4-11-26	Src	UNKNOWN	SYBR	None				22.6538	22.5977	0.146383							TRUE	1.68676	TRUE	3	15	1	85.1798				N	N	N	N	N
F8	H4R2-11-26	Src	UNKNOWN	SYBR	None				23.0418	22.4754	0.500599							TRUE	1.68676	TRUE	3	14	1	84.9861				Y	N	N	N	N
F9	H4R4-11-26	Src	UNKNOWN	SYBR	None				22.1286	22.0744	0.278045							TRUE	1.68676	TRUE	3	13	1	84.9861				N	N	Y	N	N
F10	H4R8-11-26	Src	UNKNOWN	SYBR	None				22.9073	22.3433	0.570507							TRUE	1.68676	TRUE	3	15	1	84.7925				Y	N	N	N	N
F11	H4R24-11-26	Src	UNKNOWN	SYBR	None				21.9804	22.5115	0.597295							TRUE	1.68676	TRUE	3	16	1	84.7925				Y	N	N	N	N
F12	H4R4-11-26	Hmox1	UNKNOWN	SYBR	None	3.66998	1.55612	8.65534	20.9454	21.5455	0.720402		-0.528927	0.445828			-1.87577	TRUE	2.56038	TRUE	3	12	1	83.0497				Y	N	N	N	N
G1	WT-CTR-11-26	Hmox1	UNKNOWN	SYBR	None	1	0.320578	3.11936	23.4782	23.6472	0.239099		1.34685	0.51572			0	TRUE	2.56038	TRUE	3	16	1	83.6306				N	N	N	N	N
G2	H2-11-26	Hmox1	UNKNOWN	SYBR	None	1.87046	1.33184	2.62692	22.5224	22.6034	0.114522		0.443451	0.153962			-0.903396	TRUE	2.56038	TRUE	3	16	1	83.6306				N	Y	Y	N	N
G3	H2R2-11-26	Hmox1	UNKNOWN	SYBR	None	3.13029	1.85852	5.27233	22.2346	22.0363	0.280347		-0.299452	0.236341			-1.6463	TRUE	2.56038	TRUE	3	15	1	83.6306				N	N	N	N	N
G4	H2R4-11-26	Hmox1	UNKNOWN	SYBR	None	2.99964	1.76089	5.10981	21.658	22.0398	0.460863		-0.23794	0.276786			-1.58479	TRUE	2.56038	TRUE	3	12	1	83.6306				N	N	N	N	N
G5	H2R8-11-26	Hmox1	UNKNOWN	SYBR	None	0.805821	0.564607	1.15009	23.4437	23.6592	0.315549		1.65831	0.184846			0.311468	TRUE	2.56038	TRUE	3	15	1	83.6306				N	N	N	N	N
G6	H2R24-11-26	Hmox1	UNKNOWN	SYBR	None	1.48707	0.736675	3.00182	22.9528	23.1785	0.243322		0.774377	0.364988			-0.572469	TRUE	2.56038	TRUE	3	15	1	83.6306				N	N	N	N	N
G7	H4-11-26	Hmox1	UNKNOWN	SYBR	None	1.46564	0.969735	2.21513	23.2059	23.393	0.341687		0.795319	0.214614			-0.551527	TRUE	2.56038	TRUE	3	14	1	83.6306				N	N	N	N	N
G8	H4R2-11-26	Hmox1	UNKNOWN	SYBR	None	8.1464	3.51292	18.8913	21.3203	20.7961	0.567874		-1.67932	0.437066			-3.02616	TRUE	2.56038	TRUE	3	13	1	83.6306				Y	N	N	N	N
G9	H4R4-11-26	Hmox1	UNKNOWN	SYBR	None	3.66998	1.55612	8.65534	21.3466	21.5455	0.720402		-0.528927	0.445828			-1.87577	TRUE	2.56038	TRUE	3	13	1	83.437				Y	N	N	N	N
G10	H4R8-11-26	Hmox1	UNKNOWN	SYBR	None	0.668954	0.141294	3.16714	23.239	24.2702	1.27782		1.92687	0.807941			0.580021	TRUE	2.56038	TRUE	3	15	1	83.2434				Y	N	N	N	N
G11	H4R24-11-26	Hmox1	UNKNOWN	SYBR	None	0.960258	0.346881	2.65824	23.5698	23.9168	0.695009		1.40535	0.529087			0.0585063	TRUE	2.56038	TRUE	3	16	1	83.2434				Y	N	N	N	N
G12	H4R8-11-26	Hmox1	UNKNOWN	SYBR	None	0.668954	0.141294	3.16714	25.6997	24.2702	1.27782		1.92687	0.807941			0.580021	TRUE	2.56038	TRUE	3	16	1	83.0497				Y	N	N	N	N
H1	WT-CTR-11-26	Hmox1	UNKNOWN	SYBR	None	1	0.320578	3.11936	23.8163	23.6472	0.239099		1.34685	0.51572			0	TRUE	2.56038	TRUE	3	14	1	83.2434				N	N	N	N	N
H2	H2-11-26	Hmox1	UNKNOWN	SYBR	None	1.87046	1.33184	2.62692	22.6844	22.6034	0.114522		0.443451	0.153962			-0.903396	TRUE	2.56038	TRUE	3	13	1	83.437				N	N	N	N	N
H3	H2R2-11-26	Hmox1	UNKNOWN	SYBR	None	3.13029	1.85852	5.27233	21.8381	22.0363	0.280347		-0.299452	0.236341			-1.6463	TRUE	2.56038	TRUE	3	14	1	83.437				N	N	N	N	N
H4	H2R4-11-26	Hmox1	UNKNOWN	SYBR	None	2.99964	1.76089	5.10981	21.9098	22.0398	0.460863		-0.23794	0.276786			-1.58479	TRUE	2.56038	TRUE	3	13	1	83.437				N	N	N	N	N
H5	H2R8-11-26	Hmox1	UNKNOWN	SYBR	None	0.805821	0.564607	1.15009	24.0214	23.6592	0.315549		1.65831	0.184846			0.311468	TRUE	2.56038	TRUE	3	14	1	83.437				N	N	N	N	N
H6	H2R24-11-26	Hmox1	UNKNOWN	SYBR	None	1.48707	0.736675	3.00182	23.1465	23.1785	0.243322		0.774377	0.364988			-0.572469	TRUE	2.56038	TRUE	3	14	1	83.6306				N	N	N	N	N
H7	H4-11-26	Hmox1	UNKNOWN	SYBR	None	1.46564	0.969735	2.21513	23.1858	23.393	0.341687		0.795319	0.214614			-0.551527	TRUE	2.56038	TRUE	3	14	1	83.437				N	N	N	N	N
H8	H4R2-11-26	Hmox1	UNKNOWN	SYBR	None	8.1464	3.51292	18.8913	20.1929	20.7961	0.567874		-1.67932	0.437066			-3.02616	TRUE	2.56038	TRUE	3	12	1	83.2434				Y	N	N	N	N
H9	H4R4-11-26	Hmox1	UNKNOWN	SYBR	None	3.66998	1.55612	8.65534	22.3444	21.5455	0.720402		-0.528927	0.445828			-1.87577	TRUE	2.56038	TRUE	3	13	1	83.2434				Y	N	N	N	N
H10	H4R8-11-26	Hmox1	UNKNOWN	SYBR	None	0.668954	0.141294	3.16714	23.8717	24.2702	1.27782		1.92687	0.807941			0.580021	TRUE	2.56038	TRUE	3	17	1	83.2434				Y	N	N	N	N
H11	H4R24-11-26	Hmox1	UNKNOWN	SYBR	None	0.960258	0.346881	2.65824	23.4637	23.9168	0.695009		1.40535	0.529087			0.0585063	TRUE	2.56038	TRUE	3	14	1	83.0497				Y	N	N	N	N
H12	H4R24-11-26	Hmox1	UNKNOWN	SYBR	None	0.960258	0.346881	2.65824	24.717	23.9168	0.695009		1.40535	0.529087			0.0585063	TRUE	2.56038	TRUE	3	16	1	83.0497				Y	N	Y	N	N

## Sheet: Sheet6
Block Type	96alum
Chemistry	SYBR_GREEN
Experiment File Name	D:\CWX\20211220.eds
Experiment Run End Time	2021-12-20 18:34:14 PM CST
Instrument Type	sds7500
Passive Reference	ROX
Well	Sample Name	Target Name	Task	Reporter	Quencher	RQ	RQ Min	RQ Max	Cт	Cт Mean	Cт SD	ΔCт	ΔCт Mean	ΔCт SE	HK Control ΔCт Mean	HK Control ΔCт SE	ΔΔCт	Automatic Ct Threshold	Ct Threshold	Automatic Baseline	Baseline Start	Baseline End	Efficiency	Tm1	Tm2	Tm3	Comments	BADROX	NOISE	SPIKE
A1	WT-CTR-11-26	GAPDH	UNKNOWN	SYBR	None	1	0.57455	1.74049	16.0952	16.3912	0.481575		-9.68755	0.287956			0	TRUE	2.70837	TRUE	3	9	1	84.32				N	N	N
A2	H2-11-26	GAPDH	UNKNOWN	SYBR	None	1.61899	1.37667	1.90395	15.9871	15.9903	0.0308585		-10.3826	0.0842462			-0.69509	TRUE	2.70837	TRUE	3	6	1	84.32				N	N	N
A3	H2R2-11-26	GAPDH	UNKNOWN	SYBR	None	1.38018	1.22887	1.55013	15.9064	15.981	0.100848		-10.1524	0.0603388			-0.464862	TRUE	2.70837	TRUE	3	7	1	84.5114				N	N	N
A4	H2R4-11-26	GAPDH	UNKNOWN	SYBR	None	1.03902	0.912442	1.18316	16.1154	16.0796	0.049153		-9.74277	0.0675042			-0.0552273	TRUE	2.70837	TRUE	3	7	1	84.32				N	N	N
A5	H2R8-11-26	GAPDH	UNKNOWN	SYBR	None	1.00322	0.817437	1.23122	15.7778	15.9098	0.124392		-9.69218	0.106416			-0.00463645	TRUE	2.70837	TRUE	3	7	1	84.5114				N	N	N
A6	H2R24-11-26	GAPDH	UNKNOWN	SYBR	None	1.65043	1.33092	2.04663	15.949	15.9489	0.00821216		-10.4104	0.111802			-0.722841	TRUE	2.70837	TRUE	3	8	1	84.5114				N	N	N
A7	H4-11-26	GAPDH	UNKNOWN	SYBR	None	1.45205	1.18161	1.78438	15.9937	16.0862	0.130816		-10.2256	0.0934309			-0.538088	TRUE	2.70837	TRUE	3	9	1	84.5114				N	N	N
A8	H4R2-11-26	GAPDH	UNKNOWN	SYBR	None	1.51058	1.03429	2.2062	16.0007	16.057	0.128633		-10.2826	0.196821			-0.595101	TRUE	2.70837	TRUE	3	8	1	84.32				N	N	N
A9	H4R4-11-26	GAPDH	UNKNOWN	SYBR	None	1.07341	0.839181	1.37301	15.9699	15.9935	0.0873177		-9.78974	0.111594			-0.102197	TRUE	2.70837	TRUE	3	8	1	84.32				N	N	N
A10	H4R8-11-26	GAPDH	UNKNOWN	SYBR	None	1.03959	0.815724	1.32489	16.1708	16.1151	0.0617061		-9.74356	0.109934			-0.0560122	TRUE	2.70837	TRUE	3	8	1	84.1286				N	N	N
A11	H4R24-11-26	GAPDH	UNKNOWN	SYBR	None	1.46961	1.31427	1.64331	15.9003	15.9959	0.0832525		-10.243	0.0506438			-0.555429	TRUE	2.70837	TRUE	3	9	1	84.1286				N	N	N
A12	WT-CTR-11-26	Casp8	UNKNOWN	SYBR	None				25.9533	26.0787	0.129777							TRUE	2.81401	TRUE	3	18	1	82.5971				N	N	N
B1	WT-CTR-11-26	GAPDH	UNKNOWN	SYBR	None	1	0.57455	1.74049	16.1315	16.3912	0.481575		-9.68755	0.287956			0	TRUE	2.70837	TRUE	3	6	1	84.5114				N	N	N
B2	H2-11-26	GAPDH	UNKNOWN	SYBR	None	1.61899	1.37667	1.90395	15.9612	15.9903	0.0308585		-10.3826	0.0842462			-0.69509	TRUE	2.70837	TRUE	3	8	1	84.5114				N	N	N
B3	H2R2-11-26	GAPDH	UNKNOWN	SYBR	None	1.38018	1.22887	1.55013	16.0957	15.981	0.100848		-10.1524	0.0603388			-0.464862	TRUE	2.70837	TRUE	3	8	1	84.5114				N	N	N
B4	H2R4-11-26	GAPDH	UNKNOWN	SYBR	None	1.03902	0.912442	1.18316	16.0998	16.0796	0.049153		-9.74277	0.0675042			-0.0552273	TRUE	2.70837	TRUE	3	7	1	84.7029				N	N	N
B5	H2R8-11-26	GAPDH	UNKNOWN	SYBR	None	1.00322	0.817437	1.23122	16.0248	15.9098	0.124392		-9.69218	0.106416			-0.00463645	TRUE	2.70837	TRUE	3	7	1	84.7029				N	N	N
B6	H2R24-11-26	GAPDH	UNKNOWN	SYBR	None	1.65043	1.33092	2.04663	15.9407	15.9489	0.00821216		-10.4104	0.111802			-0.722841	TRUE	2.70837	TRUE	3	8	1	84.7029				N	N	N
B7	H4-11-26	GAPDH	UNKNOWN	SYBR	None	1.45205	1.18161	1.78438	Undetermined	16.0862	0.130816		-10.2256	0.0934309			-0.538088	TRUE	2.70837	TRUE	3	18	1	80.1086				Y	N	Y
B8	H4R2-11-26	GAPDH	UNKNOWN	SYBR	None	1.51058	1.03429	2.2062	15.9661	16.057	0.128633		-10.2826	0.196821			-0.595101	TRUE	2.70837	TRUE	3	7	1	84.5114				N	N	N
B9	H4R4-11-26	GAPDH	UNKNOWN	SYBR	None	1.07341	0.839181	1.37301	16.0902	15.9935	0.0873177		-9.78974	0.111594			-0.102197	TRUE	2.70837	TRUE	3	10	1	84.32				N	N	N
B10	H4R8-11-26	GAPDH	UNKNOWN	SYBR	None	1.03959	0.815724	1.32489	16.0488	16.1151	0.0617061		-9.74356	0.109934			-0.0560122	TRUE	2.70837	TRUE	3	8	1	84.32				N	N	N
B11	H4R24-11-26	GAPDH	UNKNOWN	SYBR	None	1.46961	1.31427	1.64331	16.0345	15.9959	0.0832525		-10.243	0.0506438			-0.555429	TRUE	2.70837	TRUE	3	6	1	84.32				N	N	N
B12	H2-11-26	Casp8	UNKNOWN	SYBR	None				26.2083	26.3729	0.142618							TRUE	2.81401	TRUE	3	18	1	82.5971				N	N	N
C1	WT-CTR-11-26	GAPDH	UNKNOWN	SYBR	None	1	0.57455	1.74049	16.9469	16.3912	0.481575		-9.68755	0.287956			0	TRUE	2.70837	TRUE	3	11	1	84.5114				N	N	N
C2	H2-11-26	GAPDH	UNKNOWN	SYBR	None	1.61899	1.37667	1.90395	16.0226	15.9903	0.0308585		-10.3826	0.0842462			-0.69509	TRUE	2.70837	TRUE	3	9	1	84.7029				N	N	N
C3	H2R2-11-26	GAPDH	UNKNOWN	SYBR	None	1.38018	1.22887	1.55013	15.9408	15.981	0.100848		-10.1524	0.0603388			-0.464862	TRUE	2.70837	TRUE	3	8	1	84.7029				N	N	N
C4	H2R4-11-26	GAPDH	UNKNOWN	SYBR	None	1.03902	0.912442	1.18316	16.0236	16.0796	0.049153		-9.74277	0.0675042			-0.0552273	TRUE	2.70837	TRUE	3	7	1	84.7029				N	N	N
C5	H2R8-11-26	GAPDH	UNKNOWN	SYBR	None	1.00322	0.817437	1.23122	15.9269	15.9098	0.124392		-9.69218	0.106416			-0.00463645	TRUE	2.70837	TRUE	3	6	1	84.7029				N	N	N
C6	H2R24-11-26	GAPDH	UNKNOWN	SYBR	None	1.65043	1.33092	2.04663	15.9571	15.9489	0.00821216		-10.4104	0.111802			-0.722841	TRUE	2.70837	TRUE	3	7	1	84.7029				N	N	N
C7	H4-11-26	GAPDH	UNKNOWN	SYBR	None	1.45205	1.18161	1.78438	16.1787	16.0862	0.130816		-10.2256	0.0934309			-0.538088	TRUE	2.70837	TRUE	3	7	1	84.7029				N	N	N
C8	H4R2-11-26	GAPDH	UNKNOWN	SYBR	None	1.51058	1.03429	2.2062	16.2042	16.057	0.128633		-10.2826	0.196821			-0.595101	TRUE	2.70837	TRUE	3	8	1	84.7029				N	N	N
C9	H4R4-11-26	GAPDH	UNKNOWN	SYBR	None	1.07341	0.839181	1.37301	15.9204	15.9935	0.0873177		-9.78974	0.111594			-0.102197	TRUE	2.70837	TRUE	3	6	1	84.5114				N	N	N
C10	H4R8-11-26	GAPDH	UNKNOWN	SYBR	None	1.03959	0.815724	1.32489	16.1258	16.1151	0.0617061		-9.74356	0.109934			-0.0560122	TRUE	2.70837	TRUE	3	8	1	84.32				N	N	N
C11	H4R24-11-26	GAPDH	UNKNOWN	SYBR	None	1.46961	1.31427	1.64331	16.0528	15.9959	0.0832525		-10.243	0.0506438			-0.555429	TRUE	2.70837	TRUE	3	7	1	84.32				N	N	N
C12	H2R2-11-26	Casp8	UNKNOWN	SYBR	None				26.1175	26.1334	0.0274208							TRUE	2.81401	TRUE	3	17	1	82.7886				N	N	N
D1	WT-CTR-11-26	TP53	UNKNOWN	SYBR	None	1	0.819515	1.22023	21.3941	21.5175	0.123487		-4.56126	0.103426			0	TRUE	2.68616	TRUE	3	14	1	81.0657				N	N	N
D2	H2-11-26	TP53	UNKNOWN	SYBR	None	1.1352	0.951367	1.35456	21.5479	21.6287	0.070291		-4.7442	0.0917984			-0.182947	TRUE	2.68616	TRUE	3	13	1	81.2571				N	N	N
D3	H2R2-11-26	TP53	UNKNOWN	SYBR	None	1.13074	1.00416	1.27328	21.3296	21.3949	0.10327		-4.73853	0.0616891			-0.177272	TRUE	2.68616	TRUE	3	13	1	81.2571				N	N	N
D4	H2R4-11-26	TP53	UNKNOWN	SYBR	None	1.01111	0.820202	1.24645	21.4245	21.2452	0.155608		-4.5772	0.108732			-0.015941	TRUE	2.68616	TRUE	3	14	1	81.2571				N	N	N
D5	H2R8-11-26	TP53	UNKNOWN	SYBR	None	0.926691	0.787121	1.09101	21.188	21.1506	0.0555412		-4.45142	0.0848221			0.10984	TRUE	2.68616	TRUE	3	14	1	81.2571				N	N	N
D6	H2R24-11-26	TP53	UNKNOWN	SYBR	None	0.970454	0.764789	1.23143	21.7863	21.8413	0.0922745		-4.51799	0.123755			0.0432676	TRUE	2.68616	TRUE	3	14	1	81.2571				N	N	N
D7	H4-11-26	TP53	UNKNOWN	SYBR	None	1.31725	1.16723	1.48654	21.2508	21.353	0.10641		-4.95878	0.0628267			-0.397528	TRUE	2.68616	TRUE	3	14	1	81.2571				N	N	N
D8	H4R2-11-26	TP53	UNKNOWN	SYBR	None	1.524	1.03624	2.24136	21.2021	21.1706	0.144421		-5.16912	0.200439			-0.607866	TRUE	2.68616	TRUE	3	12	1	81.2571				N	N	N
D9	H4R4-11-26	TP53	UNKNOWN	SYBR	None	1.03405	0.818157	1.30692	21.2452	21.1737	0.0638504		-4.60957	0.106164			-0.0483093	TRUE	2.68616	TRUE	3	13	1	81.0657				N	N	N
D10	H4R8-11-26	TP53	UNKNOWN	SYBR	None	0.792955	0.621472	1.01176	21.6817	21.6321	0.0644921		-4.22657	0.110465			0.334689	TRUE	2.68616	TRUE	3	13	1	80.8743				N	N	N
D11	H4R24-11-26	TP53	UNKNOWN	SYBR	None	0.823108	0.743847	0.910815	21.8951	21.9584	0.0745463		-4.28041	0.0459005			0.280847	TRUE	2.68616	TRUE	3	13	1	80.6829				N	N	N
D12	H2R4-11-26	Casp8	UNKNOWN	SYBR	None				25.9286	25.8224	0.106087							TRUE	2.81401	TRUE	3	17	1	82.7886				N	N	N
E1	WT-CTR-11-26	TP53	UNKNOWN	SYBR	None	1	0.819515	1.22023	21.641	21.5175	0.123487		-4.56126	0.103426			0	TRUE	2.68616	TRUE	3	13	1	81.2571				N	N	N
E2	H2-11-26	TP53	UNKNOWN	SYBR	None	1.1352	0.951367	1.35456	21.6753	21.6287	0.070291		-4.7442	0.0917984			-0.182947	TRUE	2.68616	TRUE	3	13	1	81.2571				N	N	N
E3	H2R2-11-26	TP53	UNKNOWN	SYBR	None	1.13074	1.00416	1.27328	21.341	21.3949	0.10327		-4.73853	0.0616891			-0.177272	TRUE	2.68616	TRUE	3	17	1	81.2571				N	N	Y
E4	H2R4-11-26	TP53	UNKNOWN	SYBR	None	1.01111	0.820202	1.24645	21.1453	21.2452	0.155608		-4.5772	0.108732			-0.015941	TRUE	2.68616	TRUE	3	12	1	81.2571				N	N	N
E5	H2R8-11-26	TP53	UNKNOWN	SYBR	None	0.926691	0.787121	1.09101	21.177	21.1506	0.0555412		-4.45142	0.0848221			0.10984	TRUE	2.68616	TRUE	3	12	1	81.2571				N	N	N
E6	H2R24-11-26	TP53	UNKNOWN	SYBR	None	0.970454	0.764789	1.23143	21.9479	21.8413	0.0922745		-4.51799	0.123755			0.0432676	TRUE	2.68616	TRUE	3	13	1	81.2571				N	N	N
E7	H4-11-26	TP53	UNKNOWN	SYBR	None	1.31725	1.16723	1.48654	21.3451	21.353	0.10641		-4.95878	0.0628267			-0.397528	TRUE	2.68616	TRUE	3	15	1	81.2571				N	N	N
E8	H4R2-11-26	TP53	UNKNOWN	SYBR	None	1.524	1.03624	2.24136	21.013	21.1706	0.144421		-5.16912	0.200439			-0.607866	TRUE	2.68616	TRUE	3	13	1	81.0657				N	N	N
E9	H4R4-11-26	TP53	UNKNOWN	SYBR	None	1.03405	0.818157	1.30692	21.1223	21.1737	0.0638504		-4.60957	0.106164			-0.0483093	TRUE	2.68616	TRUE	3	13	1	80.8743				N	N	N
E10	H4R8-11-26	TP53	UNKNOWN	SYBR	None	0.792955	0.621472	1.01176	21.5592	21.6321	0.0644921		-4.22657	0.110465			0.334689	TRUE	2.68616	TRUE	3	14	1	80.8743				N	N	Y
E11	H4R24-11-26	TP53	UNKNOWN	SYBR	None	0.823108	0.743847	0.910815	22.0406	21.9584	0.0745463		-4.28041	0.0459005			0.280847	TRUE	2.68616	TRUE	3	14	1	80.6829				N	N	N
E12	H2R8-11-26	Casp8	UNKNOWN	SYBR	None				25.6145	25.602	0.136013							TRUE	2.81401	TRUE	3	17	1	82.7886				N	N	N
F1	WT-CTR-11-26	TP53	UNKNOWN	SYBR	None	1	0.819515	1.22023	21.5174	21.5175	0.123487		-4.56126	0.103426			0	TRUE	2.68616	TRUE	3	12	1	81.0657				N	N	N
F2	H2-11-26	TP53	UNKNOWN	SYBR	None	1.1352	0.951367	1.35456	21.663	21.6287	0.070291		-4.7442	0.0917984			-0.182947	TRUE	2.68616	TRUE	3	13	1	81.2571				N	N	N
F3	H2R2-11-26	TP53	UNKNOWN	SYBR	None	1.13074	1.00416	1.27328	21.5139	21.3949	0.10327		-4.73853	0.0616891			-0.177272	TRUE	2.68616	TRUE	3	14	1	81.2571				N	N	N
F4	H2R4-11-26	TP53	UNKNOWN	SYBR	None	1.01111	0.820202	1.24645	21.1657	21.2452	0.155608		-4.5772	0.108732			-0.015941	TRUE	2.68616	TRUE	3	12	1	81.2571				N	N	N
F5	H2R8-11-26	TP53	UNKNOWN	SYBR	None	0.926691	0.787121	1.09101	21.0868	21.1506	0.0555412		-4.45142	0.0848221			0.10984	TRUE	2.68616	TRUE	3	12	1	81.2571				N	N	N
F6	H2R24-11-26	TP53	UNKNOWN	SYBR	None	0.970454	0.764789	1.23143	21.7899	21.8413	0.0922745		-4.51799	0.123755			0.0432676	TRUE	2.68616	TRUE	3	13	1	81.2571				N	N	N
F7	H4-11-26	TP53	UNKNOWN	SYBR	None	1.31725	1.16723	1.48654	21.4632	21.353	0.10641		-4.95878	0.0628267			-0.397528	TRUE	2.68616	TRUE	3	12	1	81.2571				N	N	N
F8	H4R2-11-26	TP53	UNKNOWN	SYBR	None	1.524	1.03624	2.24136	21.2966	21.1706	0.144421		-5.16912	0.200439			-0.607866	TRUE	2.68616	TRUE	3	13	1	80.8743				N	N	N
F9	H4R4-11-26	TP53	UNKNOWN	SYBR	None	1.03405	0.818157	1.30692	21.1535	21.1737	0.0638504		-4.60957	0.106164			-0.0483093	TRUE	2.68616	TRUE	3	14	1	81.0657				N	N	N
F10	H4R8-11-26	TP53	UNKNOWN	SYBR	None	0.792955	0.621472	1.01176	21.6556	21.6321	0.0644921		-4.22657	0.110465			0.334689	TRUE	2.68616	TRUE	3	14	1	80.8743				N	N	N
F11	H4R24-11-26	TP53	UNKNOWN	SYBR	None	0.823108	0.743847	0.910815	21.9396	21.9584	0.0745463		-4.28041	0.0459005			0.280847	TRUE	2.68616	TRUE	3	14	1	80.6829				N	N	N
F12	H2R24-11-26	Casp8	UNKNOWN	SYBR	None				26.5099	26.3593	0.193472							TRUE	2.81401	TRUE	3	19	1	82.7886				N	N	N
G1	WT-CTR-11-26	Casp8	UNKNOWN	SYBR	None				26.0704	26.0787	0.129777							TRUE	2.81401	TRUE	3	18	1	83.1714				N	N	N
G2	H2-11-26	Casp8	UNKNOWN	SYBR	None				26.4548	26.3729	0.142618							TRUE	2.81401	TRUE	3	19	1	83.3629				N	Y	Y
G3	H2R2-11-26	Casp8	UNKNOWN	SYBR	None				26.1177	26.1334	0.0274208							TRUE	2.81401	TRUE	3	19	1	83.3629				N	N	N
G4	H2R4-11-26	Casp8	UNKNOWN	SYBR	None				25.7164	25.8224	0.106087							TRUE	2.81401	TRUE	3	17	1	83.3629				N	N	N
G5	H2R8-11-26	Casp8	UNKNOWN	SYBR	None				25.4602	25.602	0.136013							TRUE	2.81401	TRUE	3	17	1	83.3629				N	N	N
G6	H2R24-11-26	Casp8	UNKNOWN	SYBR	None				26.1411	26.3593	0.193472							TRUE	2.81401	TRUE	3	18	1	83.3629				N	N	N
G7	H4-11-26	Casp8	UNKNOWN	SYBR	None				26.3033	26.3118	0.0227724							TRUE	2.81401	TRUE	3	18	1	83.3629				N	N	N
G8	H4R2-11-26	Casp8	UNKNOWN	SYBR	None				26.0598	26.3397	0.315705							TRUE	2.81401	TRUE	3	18	1	83.1714				N	N	N
G9	H4R4-11-26	Casp8	UNKNOWN	SYBR	None				25.6837	25.7833	0.140796							TRUE	2.81401	TRUE	3	18	1	83.1714				N	N	N
G10	H4R8-11-26	Casp8	UNKNOWN	SYBR	None				25.7547	25.8587	0.14708							TRUE	2.81401	TRUE	3	17	1	82.98				N	N	N
G11	H4R24-11-26	Casp8	UNKNOWN	SYBR	None				26.2229	26.2388	0.0225597							TRUE	2.81401	TRUE	3	19	1	82.7886				N	N	N
G12	H4-11-26	Casp8	UNKNOWN	SYBR	None				26.3376	26.3118	0.0227724							TRUE	2.81401	TRUE	3	18	1	82.5971				N	N	N
H1	WT-CTR-11-26	Casp8	UNKNOWN	SYBR	None				26.2125	26.0787	0.129777							TRUE	2.81401	TRUE	3	18	1	83.1714				N	N	N
H2	H2-11-26	Casp8	UNKNOWN	SYBR	None				26.4558	26.3729	0.142618							TRUE	2.81401	TRUE	3	19	1	83.1714				N	N	N
H3	H2R2-11-26	Casp8	UNKNOWN	SYBR	None				26.1651	26.1334	0.0274208							TRUE	2.81401	TRUE	3	17	1	83.1714				N	N	N
H4	H2R4-11-26	Casp8	UNKNOWN	SYBR	None				25.8221	25.8224	0.106087							TRUE	2.81401	TRUE	3	17	1	83.1714				N	N	N
H5	H2R8-11-26	Casp8	UNKNOWN	SYBR	None				25.7314	25.602	0.136013							TRUE	2.81401	TRUE	3	18	1	83.1714				N	N	N
H6	H2R24-11-26	Casp8	UNKNOWN	SYBR	None				26.427	26.3593	0.193472							TRUE	2.81401	TRUE	3	18	1	83.1714				N	N	N
H7	H4-11-26	Casp8	UNKNOWN	SYBR	None				26.2945	26.3118	0.0227724							TRUE	2.81401	TRUE	3	18	1	83.1714				N	N	N
H8	H4R2-11-26	Casp8	UNKNOWN	SYBR	None				26.2773	26.3397	0.315705							TRUE	2.81401	TRUE	3	18	1	82.98				N	N	N
H9	H4R4-11-26	Casp8	UNKNOWN	SYBR	None				25.8828	25.7833	0.140796							TRUE	2.81401	TRUE	3	18	1	82.98				N	N	N
H10	H4R8-11-26	Casp8	UNKNOWN	SYBR	None				25.9627	25.8587	0.14708							TRUE	2.81401	TRUE	3	19	1	82.7886				N	N	N
H11	H4R24-11-26	Casp8	UNKNOWN	SYBR	None				26.2548	26.2388	0.0225597							TRUE	2.81401	TRUE	3	18	1	82.7886				N	N	N
H12	H4R2-11-26	Casp8	UNKNOWN	SYBR	None				26.6819	26.3397	0.315705							TRUE	2.81401	TRUE	3	18	1	82.5971				N	N	N
Analysis Type	Singleplex
Endogenous Control	Casp8
RQ Min/Max Confidence Level	95.0
Reference Sample	WT-CTR-11-26
