# Supplementary material for: Analysis of the potential ferroptosis mechanism and multitemporal expression change of central ferroptosis-related genes in cardiac ischemia–reperfusion injury
Source: Front Physiol. 2022 Aug 26;13:934901. doi: 10.3389/fphys.2022.934901 (PMC9461145; doi:10.3389/fphys.2022.934901)
Supplement: Supplementary file 3 [file Table1.XLSX]

## Sheet: GSE4105.top.table (5)
ID	adj.P.Val	P.Value	t	B	abslogFC	logFC	Gene.symbol
1377518_at	1.13e-05	1.13e-05	-13.6	2.5464	1.95076	-1.95076	Camk1g
1367648_at	3.36e-05	3.36e-05	11.2	2.0403	1.734	1.734	Igfbp2
1374961_at	4.78e-05	4.78e-05	10.5	1.8522	2.21911	2.21911	Pmf1
1379849_at	4.94e-05	4.94e-05	10.5	1.8337	1.78005	1.78005	Thoc3
1389607_at	5.27e-05	5.27e-05	-10.3	1.7982		-1.87211	LOC100911770///Rcor2l1///Rcor2
1375043_at	6.19e-05	6.19e-05	10.1	1.7064	2.35236	2.35236	Fos
1376562_at	6.49e-05	6.49e-05	9.97	1.6798	2.00683	2.00683	Tnik
1389725_at	7.31e-05	7.31e-05	-9.76	1.6096	2.62866	-2.62866	Tm7sf2
1387965_at	7.35e-05	7.35e-05	9.75	1.6068	2.45776	2.45776	Havcr1
1388924_at	0.0001065	0.0001065	9.13	1.3803	2.12009	2.12009	Angptl4
1375917_at	0.0001066	0.0001066	9.13	1.38	3.54982	3.54982	Lilrb4
1370577_at	0.0001151	0.0001151	9	1.3313	2.86692	2.86692	Zfp455
1388940_at	0.0001378	0.0001378	8.71	1.2157	2.74386	2.74386	Arhgap25
1373000_at	0.0001748	0.0001748	8.35	1.0583	1.25632	1.25632	Srpx2
1389829_at	0.0001768	0.0001768	-8.33	1.0505	1.39862	-1.39862	Tmem70
1373401_at	0.0001963	0.0001963	8.17	0.9795	2.23899	2.23899	Tnc
1387316_at	0.0002138	0.0002138	8.04	0.9208	2.92466	2.92466	Cxcl1
1369186_at	0.0002478	0.0002478	7.83	0.8176	1.04042	1.04042	Casp1
1367849_at	0.0002586	0.0002586	7.77	0.7875	1.63218	1.63218	Sdc1
1376925_at	0.000316	0.000316	-7.49	0.6436	2.64381	-2.64381	Palmd
1368518_at	0.0003683	0.0003683	7.28	0.5314	1.87673	1.87673	Cd53
1387968_at	0.0004014	0.0004014	-7.16	0.4674	1.69824	-1.69824	Slc6a15
1374211_at	0.0004789	0.0004789	6.93	0.3342	2.26404	2.26404	Prr36
1369816_at	0.0004962	0.0004962	-6.88	0.3072	1.24852	-1.24852	Rab3a
1371504_at	0.0005087	0.0005087	-6.85	0.2881	1.31331	-1.31331	Rpl37a
1369407_at	0.0005217	0.0005217	6.82	0.2686	1.45831	1.45831	Tnfrsf11b
1387180_at	0.0005246	0.0005246	6.81	0.2644	3.05011	3.05011	Il1r2
1386879_at	0.0005332	0.0005332	6.79	0.2519	1.67803	1.67803	Lgals3
1389605_at	0.0005359	0.0005359	6.79	0.2481	1.45484	1.45484	Jakmip1
1373686_at	0.0005473	0.0005473	-6.76	0.2318	3.84513	-3.84513	Serpina6
1389440_at	0.0005818	0.0005818	6.68	0.1844	2.97817	2.97817	LOC686151
1369665_a_at	0.0006074	0.0006074	6.63	0.1509	0.976981	0.976981	Il18
1368899_at	0.0006518	0.0006518	-6.54	0.0956	0.963508	-0.963508	Bmpr1a
1370361_at	0.0007658	0.0007658	6.34	-0.0321	1.54708	1.54708	Cgref1
1390447_at	0.0007728	0.0007728	6.33	-0.0393	1.94606	1.94606	Stx3
1368823_at	0.0008085	0.0008085	6.28	-0.0756	2.09179	2.09179	Cald1
1376914_at	0.0008127	0.0008127	6.27	-0.0797	1.2391	1.2391	Depdc1
1369045_at	0.0008504	0.0008504	6.22	-0.1162	1.19541	1.19541	Rgs14
1375964_at	0.0008925	0.0008925	6.16	-0.1552	1.20087	1.20087	Psph
1367850_at	0.0008975	0.0008975	6.15	-0.1598		2.00736	LOC100911825///LOC498276///Fcgr2a
1389464_at	0.0008979	0.0008979	-6.15	-0.1601	1.12897	-1.12897	Lnx1
1375709_at	0.0010039	0.0010039	6.02	-0.2509	1.43773	1.43773	Sipa1
1398419_at	0.0010057	0.0010057	-6.02	-0.2524	2.27467	-2.27467	Gas1
1373504_at	0.0010253	0.0010253	6	-0.2683	1.16652	1.16652	Glipr1
1370080_at	0.001048	0.001048	5.97	-0.2863	2.10193	2.10193	Hmox1
1375341_at	0.0010967	0.0010967	5.92	-0.3236	1.03228	1.03228	Tmem189
1368187_at	0.0011053	0.0011053	5.91	-0.3301	2.03589	2.03589	Gpnmb
1388436_at	0.0011168	0.0011168	5.9	-0.3386	2.7071	2.7071	Snrpa
1383500_at	0.001118	0.001118	5.9	-0.3395	2.69146	2.69146	Rrbp1
1369102_at	0.0011212	0.0011212	5.89	-0.3419		2.3928	Mapk8///Mapk10
1388070_a_at	0.0011633	0.0011633	-5.85	-0.3724	1.11471	-1.11471	Akap1
1398281_at	0.0011661	0.0011661	-5.85	-0.3743	2.42287	-2.42287	Ocln
1368250_at	0.00117	0.00117	5.84	-0.3771	2.58343	2.58343	Tekt1
1375691_at	0.0011896	0.0011896	-5.83	-0.3909	1.08918	-1.08918	B4galnt4
1390424_at	0.0012195	0.0012195	-5.8	-0.4116		-0.924422	LOC100910986///LOC100910525
1384334_at	0.001227	0.001227	5.79	-0.4166	2.04264	2.04264	Cps1
1368838_at	0.0012345	0.0012345	5.78	-0.4217	1.40546	1.40546	Tpm4
1370234_at	0.0012501	0.0012501	5.77	-0.4322	1.44942	1.44942	Fn1
1389834_at	0.001303	0.001303	-5.72	-0.4668	1.92285	-1.92285	Nudt8
1388131_at	0.0013233	0.0013233	5.71	-0.4797	1.25031	1.25031	Tubb2b
1369223_at	0.0013241	0.0013241	-5.71	-0.4803	1.70162	-1.70162	Gucy2d
1368541_at	0.0013345	0.0013345	5.7	-0.4868	1.24473	1.24473	Emb
1393985_at	0.0013404	0.0013404	-5.69	-0.4905	2.06407	-2.06407	Prpf3
1377034_at	0.0013518	0.0013518	5.68	-0.4976	1.36202	1.36202	Serpinb1a
1367879_at	0.0013561	0.0013561	5.68	-0.5003	1.7194	1.7194	Cdk5rap3
1369002_at	0.0013776	0.0013776	5.66	-0.5135	2.1315	2.1315	Soat1
1390532_at	0.0013866	0.0013866	-5.65	-0.519	2.11907	-2.11907	Slc13a4
1385333_at	0.0013937	0.0013937	-5.65	-0.5233	1.25422	-1.25422	Aatk
1368735_a_at	0.0013947	0.0013947	5.65	-0.5239	2.96918	2.96918	Trpv2
1398373_at	0.0013977	0.0013977	5.65	-0.5257	1.36218	1.36218	B3galnt1
1388340_at	0.0014003	0.0014003	5.64	-0.5273	1.55794	1.55794	Ns5atp9
1386770_x_at	0.0014338	0.0014338	-5.62	-0.5471	1.79775	-1.79775	Kcne2
1398305_at	0.0014525	0.0014525	5.6	-0.5581	1.95903	1.95903	Syt17
1367901_at	0.0014756	0.0014756	5.59	-0.5714	0.738762	0.738762	Gusb
1377488_at	0.0014774	0.0014774	-5.58	-0.5724	0.947003	-0.947003	Mapk8ip2
1373972_at	0.0015386	0.0015386	5.54	-0.6068	0.82754	0.82754	Nav1
1388190_at	0.001577	0.001577	-5.51	-0.6277	1.19809	-1.19809	Apob
1375112_at	0.0016082	0.0016082	-5.49	-0.6444	1.29451	-1.29451	Nr2f6
1367545_at	0.0016601	0.0016601	-5.46	-0.6714	0.746906	-0.746906	Rabgap1
1370382_at	0.0016701	0.0016701	5.45	-0.6765	3.18687	3.18687	RT1-Db1
1368266_at	0.0016763	0.0016763	5.45	-0.6797	1.75113	1.75113	Arg1
1374922_at	0.001686	0.001686	5.44	-0.6846	1.17179	1.17179	Gpn2
1386618_at	0.0016865	0.0016865	-5.44	-0.6849	1.20312	-1.20312	Flywch1
1374036_at	0.0017054	0.0017054	5.43	-0.6944	1.18883	1.18883	Mcm2
1373722_at	0.0017069	0.0017069	5.43	-0.6951	2.51304	2.51304	Kif20a
1378906_at	0.0017121	0.0017121	5.42	-0.6977	1.8165	1.8165	Ddias
1368356_a_at	0.0017382	0.0017382	5.41	-0.7106	1.02921	1.02921	Erap1
1371774_at	0.0017866	0.0017866	5.38	-0.7341	1.26814	1.26814	Sat1
1371447_at	0.0018726	0.0018726	5.33	-0.7745		1.32911	LOC100910270///Plac8
1386925_at	0.0018807	0.0018807	5.32	-0.7782	1.0859	1.0859	Arpc1b
1376961_at	0.0018896	0.0018896	-5.32	-0.7823	1.93082	-1.93082	Lrfn2
1371782_at	0.0019147	0.0019147	5.3	-0.7937	1.10391	1.10391	Nipsnap3b
1372897_at	0.0019439	0.0019439	5.29	-0.8067	1.24505	1.24505	Plod2
1373205_at	0.001958	0.001958	-5.28	-0.8129	0.76839	-0.76839	U2af1l4
1367802_at	0.0019688	0.0019688	5.27	-0.8177	1.04667	1.04667	Sgk1
1372200_at	0.0019869	0.0019869	5.27	-0.8256	1.84962	1.84962	Gpsm3
1371139_at	0.0020154	0.0020154	5.25	-0.8379	1.95873	1.95873	Pls3
1368969_at	0.0020199	0.0020199	-5.25	-0.8398	1.81123	-1.81123	Sost
1369892_at	0.0020246	0.0020246	5.25	-0.8418		0.884381	LOC100912677///LOC100910554///LOC100360754///LOC684773///LOC680322///Hist1h2ai///Hist1h2an///Hist1h2ac
1390584_at	0.0020424	0.0020424	5.24	-0.8494	2.32578	2.32578	Rnf165
1387101_at	0.0020554	0.0020554	5.23	-0.8549	1.28708	1.28708	Acsl4
1389215_at	0.0020783	0.0020783	5.22	-0.8645	0.756198	0.756198	Sephs1
1387048_at	0.0020968	0.0020968	5.21	-0.8722	1.16204	1.16204	Ddx39a
1367860_a_at	0.0020988	0.0020988	5.21	-0.873	1.38766	1.38766	Mmp14
1376688_a_at	0.0021048	0.0021048	5.2	-0.8755	1.31814	1.31814	LOC100910669
1369964_at	0.002115	0.002115	5.2	-0.8797	1.30657	1.30657	Coro1a
1376902_x_at	0.0021214	0.0021214	5.2	-0.8823	1.25022	1.25022	Elfn2
1368007_at	0.0021292	0.0021292	5.19	-0.8855		1.67747	LOC100911413///Dmbt1
1372514_s_at	0.0021517	0.0021517	5.18	-0.8946		0.844479	Dnal4///RGD1559781
1375406_s_at	0.0021532	0.0021532	-5.18	-0.8952		-0.941809	LOC100909995///Fnbp1
1369867_at	0.0021939	0.0021939	5.16	-0.9115	1.06922	1.06922	St8sia1
1368349_at	0.0022009	0.0022009	-5.16	-0.9143	1.564	-1.564	Fgfbp1
1373321_at	0.0022094	0.0022094	5.15	-0.9176	2.58373	2.58373	Myrf
1374730_at	0.0022242	0.0022242	5.15	-0.9234	1.3806	1.3806	Tyrobp
1385245_at	0.0022388	0.0022388	5.14	-0.9291	1.92573	1.92573	Fcrl6
1388936_at	0.0022688	0.0022688	5.13	-0.9407	1.01312	1.01312	Cdh11
1386938_at	0.0022689	0.0022689	5.13	-0.9407	1.36848	1.36848	Anpep
1387925_at	0.0022761	0.0022761	5.12	-0.9435	0.818346	0.818346	Asns
1373065_at	0.0022956	0.0022956	5.11	-0.9509	1.05955	1.05955	Ptpn18
1370106_at	0.002298	0.002298	-5.11	-0.9519	1.77777	-1.77777	Fgf18
1388005_at	0.0023045	0.0023045	5.11	-0.9543	2.13591	2.13591	Prpf18
1387591_at	0.0023273	0.0023273	-5.1	-0.9629	1.09612	-1.09612	Il2ra
1377275_at	0.0023278	0.0023278	-5.1	-0.9631	0.965354	-0.965354	Art1
1367973_at	0.0023904	0.0023904	5.07	-0.9863	1.88981	1.88981	Ccl2
1398303_s_at	0.0024086	0.0024086	5.06	-0.9929	1.41278	1.41278	Tpm3
1370617_at	0.002414	0.002414	-5.06	-0.9949	0.984635	-0.984635	Grb2
1369191_at	0.0024157	0.0024157	5.06	-0.9955	3.23186	3.23186	Il6
1376533_at	0.0024421	0.0024421	-5.05	-1.005	1.43461	-1.43461	Baz2b
1389627_at	0.0024906	0.0024906	5.03	-1.0223	1.90333	1.90333	Zfp746
1367854_at	0.0026896	0.0026896	4.95	-1.0898	0.786603	0.786603	Acly
1370281_at	0.0026922	0.0026922	4.95	-1.0907	1.14057	1.14057	Fabp5
1390383_at	0.0026942	0.0026942	4.95	-1.0913	1.29068	1.29068	Plin2
1373889_at	0.0029018	0.0029018	4.88	-1.1569	1.96027	1.96027	RGD1561778
1393464_at	0.0029193	0.0029193	-4.87	-1.1622	0.653038	-0.653038	RGD1311251
1382406_at	0.0029831	0.0029831	4.85	-1.1814	1.40668	1.40668	Map3k9
1369672_at	0.0029892	0.0029892	4.85	-1.1832	0.98993	0.98993	Alox5ap
1389408_at	0.0029932	0.0029932	4.85	-1.1844		1.46362	LOC100359539///Rrm2
1367705_at	0.0030307	0.0030307	4.83	-1.1954	1.30763	1.30763	Glrx
1371618_s_at	0.0030351	0.0030351	4.83	-1.1967	1.06967	1.06967	Tubb3
1389189_at	0.0030706	0.0030706	4.82	-1.2071	1.25521	1.25521	Actn1
1368490_at	0.0030798	0.0030798	4.82	-1.2097	1.4596	1.4596	Cd14
1367931_a_at	0.0031327	0.0031327	4.8	-1.2248	1.01435	1.01435	Ptbp1
1375523_at	0.0031841	0.0031841	4.78	-1.2393	0.989104	0.989104	Marcks
1371644_at	0.003197	0.003197	4.78	-1.2429	1.18752	1.18752	Twf1
1373207_at	0.0032302	0.0032302	4.77	-1.2521	1.16437	1.16437	Cers6
1374876_at	0.0032456	0.0032456	4.76	-1.2564	0.947238	0.947238	Leprotl1
1369387_at	0.0032569	0.0032569	4.76	-1.2595	0.721356	0.721356	Vav1
1377153_a_at	0.0033019	0.0033019	4.75	-1.2717	0.854406	0.854406	Klhl6
1368226_at	0.0033074	0.0033074	4.75	-1.2732	1.84034	1.84034	Dnph1
1370885_at	0.0033127	0.0033127	4.74	-1.2746	1.72256	1.72256	Ctsz
1367998_at	0.0033171	0.0033171	4.74	-1.2758	1.48003	1.48003	Slpi
1386913_at	0.0034249	0.0034249	4.71	-1.3044	1.24271	1.24271	Pdpn
1372358_at	0.0034367	0.0034367	-4.71	-1.3074	0.719552	-0.719552	Iqsec1
1371583_at	0.0034429	0.0034429	4.71	-1.3091	0.992155	0.992155	Rbm3
1390232_at	0.0035574	0.0035574	4.68	-1.3383	1.15435	1.15435	RGD1311946
1392694_at	0.0035651	0.0035651	4.67	-1.3403	0.99037	0.99037	Bcl2l15
1389591_at	0.003585	0.003585	4.67	-1.3453	0.680128	0.680128	Hs1bp3
1370869_at	0.0036056	0.0036056	4.66	-1.3504	1.67368	1.67368	Bcat1
1388029_at	0.0036096	0.0036096	-4.66	-1.3514	2.0698	-2.0698	Zfand4
1372156_at	0.0036429	0.0036429	4.65	-1.3596	1.37011	1.37011	Tmem97
1371079_at	0.0036487	0.0036487	4.65	-1.361	1.90854	1.90854	Fcgr2b
1377340_at	0.003691	0.003691	4.64	-1.3714	0.951923	0.951923	Tfpi2
1373718_at	0.0037074	0.0037074	4.63	-1.3754	1.25319	1.25319	Tubb2a
1372229_at	0.003716	0.003716	4.63	-1.3775	0.690632	0.690632	Pdk3
1367914_at	0.0037939	0.0037939	4.61	-1.3961	1.12432	1.12432	Emp3
1389203_at	0.0038094	0.0038094	4.61	-1.3998	0.827337	0.827337	Sh3bp5l
1369539_at	0.0038152	0.0038152	-4.61	-1.4011	0.698794	-0.698794	St3gal3
1373758_at	0.0038799	0.0038799	-4.59	-1.4163	0.673274	-0.673274	Flad1
1370219_at	0.0038885	0.0038885	4.59	-1.4183	1.03204	1.03204	Cyba
1389860_at	0.003915	0.003915	4.58	-1.4244	2.4958	2.4958	Mex3c
1368829_at	0.0040461	0.0040461	4.55	-1.4541	1.22019	1.22019	Fbn1
1373575_at	0.0040558	0.0040558	4.55	-1.4562	1.04971	1.04971	Fcer1g
1372665_at	0.0040678	0.0040678	4.55	-1.4589	2.68877	2.68877	Psat1
1376001_at	0.004081	0.004081	4.54	-1.4618	0.817356	0.817356	Polr1e
1368766_at	0.0041353	0.0041353	4.53	-1.4738	0.668631	0.668631	Mmp7
1370895_at	0.0041685	0.0041685	4.52	-1.481	0.839024	0.839024	Col5a2
1368574_at	0.0041769	0.0041769	-4.52	-1.4828	0.668795	-0.668795	Adra1b
1387675_at	0.0041923	0.0041923	4.52	-1.4861	1.40635	1.40635	Plau
1387930_at	0.0042087	0.0042087	4.51	-1.4896	0.909425	0.909425	Reg3a
1373959_at	0.0042374	0.0042374	4.51	-1.4958	0.933251	0.933251	Ppp2r1b
1375170_at	0.0042434	0.0042434	4.51	-1.4971	0.946836	0.946836	S100a11
1392900_at	0.0042498	0.0042498	4.5	-1.4984	0.716093	0.716093	Capza1
1368494_at	0.0043721	0.0043721	4.48	-1.5241	1.61785	1.61785	S100a8
1377089_a_at	0.0043764	0.0043764	4.48	-1.525	0.883416	0.883416	Tspan5
1376761_at	0.0044743	0.0044743	-4.46	-1.5451	0.854298	-0.854298	Hdac4
1398360_at	0.0045439	0.0045439	4.44	-1.5591	0.874814	0.874814	Elovl1
1370550_at	0.0045613	0.0045613	-4.44	-1.5625	0.803965	-0.803965	Lsamp
1386859_at	0.0045737	0.0045737	4.43	-1.565	1.21814	1.21814	Tkt
1379302_at	0.0045977	0.0045977	4.43	-1.5697	0.864884	0.864884	Rbpj
1387619_at	0.0046105	0.0046105	-4.43	-1.5723	1.30058	-1.30058	Crebbp
1367751_at	0.0046477	0.0046477	4.42	-1.5796	0.660197	0.660197	Dpm2
1368202_a_at	0.0046498	0.0046498	4.42	-1.58	0.95773	0.95773	Dab2
1373771_at	0.0046516	0.0046516	4.42	-1.5803	0.970216	0.970216	Zbtb34
1374693_at	0.0046693	0.0046693	4.41	-1.5838	0.757047	0.757047	Parp16
1377480_at	0.0046806	0.0046806	4.41	-1.586	0.906617	0.906617	Bud13
1368573_at	0.0047047	0.0047047	4.41	-1.5907	0.983069	0.983069	Kpnb1
1367856_at	0.0047066	0.0047066	4.41	-1.591	1.44468	1.44468	G6pd
1376675_at	0.0047192	0.0047192	4.4	-1.5935	1.48591	1.48591	Cd300a
1386422_at	0.0048232	0.0048232	4.38	-1.6133	2.47485	2.47485	Dchs1
1373160_at	0.0048388	0.0048388	4.38	-1.6162	0.858498	0.858498	Plpp5
1387221_at	0.0048927	0.0048927	4.37	-1.6263	0.680701	0.680701	Gch1
1388073_a_at	0.0049153	0.0049153	-4.37	-1.6305	0.89871	-0.89871	Nup58
1389010_at	0.0049252	0.0049252	4.36	-1.6323	0.694223	0.694223	Lta4h
1371897_at	0.0049465	0.0049465	-4.36	-1.6363	0.612537	-0.612537	Plpp7
1390404_at	0.0049974	0.0049974	-4.35	-1.6456	0.653773	-0.653773	Lama2
1374442_at	0.0050143	0.0050143	4.35	-1.6487	0.798171	0.798171	Srsf9
1375039_x_at	0.0050513	0.0050513	-4.34	-1.6554	2.12159	-2.12159	Fcgbpl1
1390625_at	0.0051084	0.0051084	-4.33	-1.6657	1.69038	-1.69038	Zfp956
1370928_at	0.0051103	0.0051103	4.33	-1.666	1.24515	1.24515	Litaf
1367581_a_at	0.0052103	0.0052103	4.31	-1.6837	1.75695	1.75695	Spp1
1368029_at	0.0052107	0.0052107	4.31	-1.6837		0.63462	Gnai1///Gnai3
1367559_at	0.0052158	0.0052158	4.31	-1.6846		0.873634	LOC100364138///LOC100363177///LOC100362384///LOC100360087///LOC100359668///Ftl1
1389073_at	0.0052288	0.0052288	4.31	-1.6869	0.572693	0.572693	Reep4
1388762_at	0.0052774	0.0052774	4.3	-1.6954	0.803617	0.803617	Iqgap1
1391228_at	0.0053157	0.0053157	-4.29	-1.702	2.1527	-2.1527	Rsph1
1371914_at	0.0053461	0.0053461	4.29	-1.7072	0.863811	0.863811	Smarcb1
1388105_at	0.005348	0.005348	4.29	-1.7075	0.978003	0.978003	Cdc123
1392807_at	0.0053829	0.0053829	4.28	-1.7135	0.677862	0.677862	Lig3
1389248_at	0.0053942	0.0053942	4.28	-1.7154	2.7177	2.7177	Galk1
1370222_at	0.0053991	0.0053991	-4.28	-1.7162	1.34701	-1.34701	Pitx3
1371260_at	0.0054078	0.0054078	-4.28	-1.7177	2.59001	-2.59001	Mcpt2
1374527_at	0.0054203	0.0054203	-4.28	-1.7198	0.661431	-0.661431	Echdc2
1369271_at	0.0054664	0.0054664	-4.27	-1.7276	0.595177	-0.595177	Prkab2
1370347_at	0.0055284	0.0055284	4.26	-1.7379	1.28669	1.28669	Pdlim7
1399027_at	0.0055302	0.0055302	4.26	-1.7382	0.951144	0.951144	Rhoa
1370110_at	0.0055858	0.0055858	-4.25	-1.7474	2.19129	-2.19129	Kcnk4
1373224_at	0.0056304	0.0056304	4.24	-1.7547	2.60933	2.60933	St3gal4
1369756_a_at	0.0056368	0.0056368	-4.24	-1.7557	1.62537	-1.62537	Slc4a4
1388911_at	0.0056692	0.0056692	4.23	-1.7609	1.72718	1.72718	Prim2
1373911_at	0.0056948	0.0056948	4.23	-1.7651	1.19704	1.19704	Postn
1369499_at	0.0057547	0.0057547	4.22	-1.7747	2.19508	2.19508	Tyms
1373777_at	0.0057642	0.0057642	4.22	-1.7762	1.28703	1.28703	Rgs16
1374801_at	0.005767	0.005767	-4.22	-1.7766	1.63287	-1.63287	LOC102551541
1369801_at	0.0057671	0.0057671	4.22	-1.7767	0.893861	0.893861	Sell
1388116_at	0.0058211	0.0058211	4.21	-1.7852	0.968454	0.968454	Col1a1
1367834_at	0.0058217	0.0058217	4.21	-1.7853		1.20117	LOC100912604///LOC100364487///Srm
1371250_at	0.0058422	0.0058422	4.21	-1.7885	0.947713	0.947713	Pf4
1387125_at	0.005855	0.005855	4.21	-1.7905	1.42369	1.42369	S100a9
1376100_at	0.0058586	0.0058586	4.2	-1.7911	1.74316	1.74316	Tubb6
1374449_at	0.0058702	0.0058702	4.2	-1.7929	1.14903	1.14903	Cdca3
1370245_at	0.0058892	0.0058892	4.2	-1.7959	0.81117	0.81117	Ctsl
1386143_at	0.005928	0.005928	4.19	-1.8019	0.650446	0.650446	Wdpcp
1388802_at	0.0059382	0.0059382	-4.19	-1.8035	0.841673	-0.841673	Bex1
1390797_at	0.005939	0.005939	4.19	-1.8036	2.02364	2.02364	Lcp2
1377126_at	0.0059531	0.0059531	4.19	-1.8058	0.806825	0.806825	Commd7
1387844_at	0.0060129	0.0060129	4.18	-1.815	0.834496	0.834496	Lasp1
1387936_at	0.0060175	0.0060175	-4.18	-1.8157	3.18113	-3.18113	Sult2a2
1373674_at	0.0060468	0.0060468	4.18	-1.8202	0.999506	0.999506	Mfap5
1388998_at	0.0060676	0.0060676	-4.17	-1.8233	1.19986	-1.19986	Dmtn
1390119_at	0.0060705	0.0060705	4.17	-1.8238	1.02719	1.02719	Sfrp2
1367676_at	0.0061247	0.0061247	4.16	-1.8319		1.43382	LOC100911856///RGD1559962///RGD1561694///Hmgb2l1///Hmgb2
1368822_at	0.0061257	0.0061257	4.16	-1.8321	0.826406	0.826406	Fstl1
1387502_at	0.0061798	0.0061798	4.16	-1.8402	0.762865	0.762865	Stk17b
1388142_at	0.0062068	0.0062068	4.15	-1.8442	1.08601	1.08601	Vcan
1387929_at	0.0062293	0.0062293	-4.15	-1.8475	0.675879	-0.675879	Pmf31
1372773_at	0.006389	0.006389	4.13	-1.8709	0.598373	0.598373	Npdc1
1372516_at	0.0063907	0.0063907	4.13	-1.8711	1.28612	1.28612	Kif22
1373185_at	0.0063993	0.0063993	4.12	-1.8723	0.737268	0.737268	Ssr2
1390022_at	0.0064605	0.0064605	4.12	-1.8811	0.830585	0.830585	Arpc5
1387684_at	0.0064718	0.0064718	-4.11	-1.8827	0.667289	-0.667289	Ppard
1372852_at	0.0064837	0.0064837	4.11	-1.8844	1.36636	1.36636	Ptprcap
1372462_at	0.0064885	0.0064885	4.11	-1.8851	0.892243	0.892243	Acat2
1372105_at	0.0065983	0.0065983	-4.1	-1.9006	0.565342	-0.565342	Micu2
1389030_a_at	0.006629	0.006629	4.09	-1.9049	1.55802	1.55802	Src
1387181_at	0.0066768	0.0066768	-4.09	-1.9115	1.15633	-1.15633	Myf6
1370432_at	0.0066927	0.0066927	4.08	-1.9137	0.747891	0.747891	Pou3f1
1371803_at	0.0066932	0.0066932	4.08	-1.9138	1.02375	1.02375	Gm2a
1373250_at	0.0066955	0.0066955	4.08	-1.9141		1.0823	Anln///Anlnl1
1370902_at	0.0067525	0.0067525	4.08	-1.9219	1.49561	1.49561	Akr1b8
1368733_at	0.0067538	0.0067538	-4.08	-1.9221	0.673467	-0.673467	Sult1e1
1367967_at	0.0068138	0.0068138	4.07	-1.9303	0.755202	0.755202	P3h1
1386890_at	0.0068727	0.0068727	4.06	-1.9382	0.705949	0.705949	S100a10
1387799_at	0.006951	0.006951	4.05	-1.9487	1.23731	1.23731	Fxyd2
1372080_at	0.006964	0.006964	-4.05	-1.9504	0.585605	-0.585605	Immt
1388243_at	0.0069717	0.0069717	4.05	-1.9515	0.658124	0.658124	Gpr176
1367712_at	0.0069826	0.0069826	4.05	-1.9529	1.35305	1.35305	Timp1
1368145_at	0.0069915	0.0069915	4.04	-1.9541	1.71592	1.71592	Pcp4
1388482_at	0.0070031	0.0070031	4.04	-1.9556	1.05914	1.05914	Fam129b
1374062_x_at	0.0070232	0.0070232	-4.04	-1.9583	0.619624	-0.619624	Mapre3
1373491_at	0.0070251	0.0070251	4.04	-1.9585	0.654196	0.654196	Gba
1367831_at	0.00703	0.00703	4.04	-1.9592	0.603505	0.603505	Tp53
1369019_at	0.0070866	0.0070866	4.03	-1.9666	1.5648	1.5648	Chrna5
1368610_at	0.0071038	0.0071038	4.03	-1.9688	1.28639	1.28639	Milr1
1367721_at	0.0072041	0.0072041	4.02	-1.9818	0.911081	0.911081	Sdc4
1387005_at	0.0072053	0.0072053	4.02	-1.982	1.35014	1.35014	Ctss
1390482_at	0.007214	0.007214	4.02	-1.9831	2.06309	2.06309	Tmod2
1367811_at	0.0072145	0.0072145	4.02	-1.9832	0.765292	0.765292	Phgdh
1389553_at	0.0072644	0.0072644	4.01	-1.9895	1.6583	1.6583	Clec4a3
1388613_at	0.0072894	0.0072894	-4.01	-1.9927	0.564853	-0.564853	Isca1
1388710_at	0.0074043	0.0074043	-3.99	-2.0072	0.646222	-0.646222	Rreb1
1376700_at	0.0074072	0.0074072	3.99	-2.0076	0.711262	0.711262	Lima1
1375857_at	0.0074135	0.0074135	3.99	-2.0084	0.940015	0.940015	Myof
1371620_at	0.0074203	0.0074203	3.99	-2.0092	1.10347	1.10347	Prelid1
1367798_at	0.0074583	0.0074583	3.99	-2.014	0.631995	0.631995	Ahcy
1390798_at	0.0075014	0.0075014	3.98	-2.0193	1.25414	1.25414	Ptprc
1388460_at	0.0075115	0.0075115	3.98	-2.0205	0.985353	0.985353	Capg
1389555_at	0.0075146	0.0075146	3.98	-2.0209	1.19254	1.19254	Tcf19
1388596_at	0.0075178	0.0075178	3.98	-2.0213	1.58848	1.58848	Cotl1
1372410_at	0.0075453	0.0075453	3.98	-2.0247	0.788401	0.788401	C1qtnf6
1374354_at	0.0075497	0.0075497	3.98	-2.0253	1.96681	1.96681	Phf19
1388103_at	0.0075638	0.0075638	3.98	-2.027	1.08518	1.08518	Tmem37
1368827_at	0.007587	0.007587	-3.97	-2.0298	0.697445	-0.697445	Gata6
1387952_a_at	0.0075943	0.0075943	3.97	-2.0307	0.858764	0.858764	Cd44
1386900_at	0.0076328	0.0076328	3.97	-2.0354	1.06851	1.06851	Serp1
1398349_at	0.0076693	0.0076693	3.96	-2.0398		0.990552	RGD1562178///Ak2
1367684_at	0.0076801	0.0076801	3.96	-2.0412	1.5957	1.5957	Crybb2
1368730_a_at	0.0077001	0.0077001	3.96	-2.0436	1.06215	1.06215	Adcyap1r1
1371358_at	0.0077289	0.0077289	-3.96	-2.047		-0.628574	RGD1560015///Tecr
1371575_at	0.0077949	0.0077949	3.95	-2.0549	0.905109	0.905109	Msn
1387687_at	0.0078048	0.0078048	3.95	-2.0561	1.01337	1.01337	Igsf6
1374373_at	0.0078339	0.0078339	-3.94	-2.0596	2.05475	-2.05475	Shroom1
1389209_at	0.0078592	0.0078592	3.94	-2.0626	0.606165	0.606165	Lmf2
1387378_at	0.0080234	0.0080234	3.92	-2.0818	1.60367	1.60367	Fcnb
1393891_at	0.0080655	0.0080655	3.92	-2.0867	1.02699	1.02699	Col8a1
1389123_at	0.0080657	0.0080657	3.92	-2.0867	1.23602	1.23602	Ccl6
1375764_at	0.008078	0.008078	-3.92	-2.0881	2.21393	-2.21393	Chmp2b
1371487_at	0.0080827	0.0080827	3.92	-2.0886	0.870886	0.870886	Sh3bgrl3
1387664_at	0.0081159	0.0081159	3.91	-2.0925	0.648666	0.648666	Atp6v1b2
1367732_at	0.0081747	0.0081747	3.91	-2.0992	0.686867	0.686867	Gnb1
1375149_at	0.0082611	0.0082611	-3.9	-2.109	0.858019	-0.858019	Lrrc4b
1372931_at	0.0082699	0.0082699	3.9	-2.1099	0.822172	0.822172	Praf2
1387057_at	0.0082756	0.0082756	3.9	-2.1106	2.88694	2.88694	Slc7a8
1369861_at	0.0083202	0.0083202	3.89	-2.1156	1.67883	1.67883	Gabra6
1388784_at	0.0083614	0.0083614	3.89	-2.1202	0.862015	0.862015	Csf1r
1373447_at	0.0083783	0.0083783	3.89	-2.1221	0.841759	0.841759	Hn1l
1384283_at	0.008379	0.008379	3.88	-2.1222	1.18118	1.18118	Asb9
1375549_at	0.008405	0.008405	-3.88	-2.125	0.78951	-0.78951	Usp2
1368693_at	0.0084368	0.0084368	3.88	-2.1286	1.3787	1.3787	Fgr
1369204_at	0.0084647	0.0084647	3.88	-2.1316	1.23002	1.23002	Hck
1374399_at	0.0084667	0.0084667	-3.88	-2.1319	0.602114	-0.602114	Ehd4
1374195_at	0.0084822	0.0084822	-3.87	-2.1336	1.07796	-1.07796	Lad1
1392941_at	0.0084823	0.0084823	3.87	-2.1336	0.751331	0.751331	Hip1
1389079_at	0.0085228	0.0085228	-3.87	-2.138	0.871133	-0.871133	Dhrs7c
1371946_at	0.0085303	0.0085303	3.87	-2.1388	0.974125	0.974125	Glmp
1387071_a_at	0.0085493	0.0085493	-3.87	-2.1409	0.762712	-0.762712	Mapt
1389983_at	0.0085674	0.0085674	3.87	-2.1429	0.689034	0.689034	Noc2l
1373190_at	0.0085812	0.0085812	3.86	-2.1444	0.557615	0.557615	Cnot4
1390510_at	0.0086366	0.0086366	3.86	-2.1504		1.12024	LOC100912573///Ms4a6bl
1374468_at	0.008665	0.008665	3.86	-2.1534	0.57156	0.57156	Myd88
1372413_at	0.0086943	0.0086943	3.85	-2.1566	0.544474	0.544474	Mcrs1
1376174_at	0.0087373	0.0087373	-3.85	-2.1612	1.62428	-1.62428	Serpina11
1373557_at	0.0087612	0.0087612	3.85	-2.1637	1.08426	1.08426	Mcm4
1371977_at	0.0088594	0.0088594	3.84	-2.1741	0.892396	0.892396	Arpc3
1387177_at	0.0088684	0.0088684	-3.84	-2.1751	0.816128	-0.816128	Vipr2
1389413_at	0.0088765	0.0088765	3.83	-2.1759	1.09094	1.09094	Evi2a
1389870_at	0.0089039	0.0089039	-3.83	-2.1788	0.964142	-0.964142	2021-03-02
1372869_at	0.0089196	0.0089196	3.83	-2.1805	0.55085	0.55085	Gtpbp4
1387742_at	0.0089491	0.0089491	3.83	-2.1835	0.91813	0.91813	Ccr2
1374278_at	0.0089512	0.0089512	-3.83	-2.1838	1.02314	-1.02314	Fitm2
1376013_at	0.0089668	0.0089668	3.83	-2.1854	1.49532	1.49532	Ttc9
1371559_at	0.0089733	0.0089733	3.83	-2.1861	0.60518	0.60518	Nadk
1367928_at	0.0089826	0.0089826	-3.82	-2.187	0.736053	-0.736053	Myh7
1389877_at	0.0090029	0.0090029	3.82	-2.1891	0.728674	0.728674	Foxc1
1372622_at	0.0090104	0.0090104	3.82	-2.1899	0.96787	0.96787	Fam212a
1398300_at	0.0090696	0.0090696	3.82	-2.196	0.657745	0.657745	Atp1b3
1390479_at	0.009092	0.009092	-3.81	-2.1983	0.797768	-0.797768	Tlx3
1371194_at	0.0091001	0.0091001	3.81	-2.1992	1.31789	1.31789	Tnfaip6
1377185_at	0.0091197	0.0091197	3.81	-2.2012	2.01009	2.01009	Tmem229b
1388623_at	0.0091642	0.0091642	-3.81	-2.2057	0.727608	-0.727608	Ehd1
1388393_at	0.009198	0.009198	3.8	-2.2092		1.04921	LOC685108///Plp2
1384546_at	0.0092263	0.0092263	3.8	-2.212	1.04537	1.04537	Gpr161
1398261_at	0.0092445	0.0092445	-3.8	-2.2139	0.572731	-0.572731	Timm44
1371411_at	0.0092465	0.0092465	3.8	-2.2141	0.833468	0.833468	Plxnb2
1372044_at	0.0092622	0.0092622	-3.8	-2.2157	0.610729	-0.610729	Tango2
1374541_at	0.009284	0.009284	-3.8	-2.2179	0.635951	-0.635951	Gys1
1376161_at	0.0093307	0.0093307	-3.79	-2.2225	0.657168	-0.657168	Tmed4
1367614_at	0.009368	0.009368	3.79	-2.2263	0.735675	0.735675	Anxa1
1386454_at	0.0094154	0.0094154	-3.78	-2.231	0.795655	-0.795655	Slc23a3
1376315_at	0.0094163	0.0094163	3.78	-2.2311	0.694001	0.694001	Edem2
1390687_at	0.0094605	0.0094605	3.78	-2.2355	2.94549	2.94549	Plek
1399050_at	0.0094651	0.0094651	3.78	-2.2359	1.03154	1.03154	Adss
1398572_at	0.0094751	0.0094751	-3.78	-2.2369	0.549576	-0.549576	Rnmt
1374777_at	0.0095693	0.0095693	-3.77	-2.2462		-0.642452	Tigar///RGD1308005
1387118_at	0.0095871	0.0095871	3.77	-2.2479		2.37825	Cyp3a23/3a1
1387806_at	0.0096004	0.0096004	3.77	-2.2492	0.857471	0.857471	Rap1b
1372294_at	0.0096203	0.0096203	3.77	-2.2511	0.535454	0.535454	Pxdn
1370415_at	0.0096366	0.0096366	3.76	-2.2527	0.73703	0.73703	Rassf5
1388963_at	0.0096424	0.0096424	-3.76	-2.2533	0.798275	-0.798275	Astn1
1374677_at	0.0097018	0.0097018	-3.76	-2.259	0.781785	-0.781785	Adssl1
1370154_at	0.0097043	0.0097043	3.76	-2.2593	0.84216	0.84216	Lyz2
1371075_at	0.00971	0.00971	-3.76	-2.2598	1.0696	-1.0696	Myh13
1386865_at	0.0097558	0.0097558	-3.75	-2.2642	0.797258	-0.797258	Sparcl1
1388809_at	0.0098411	0.0098411	3.75	-2.2724	0.959514	0.959514	Smpdl3a
1390143_at	0.0098804	0.0098804	3.74	-2.2761	1.94359	1.94359	Sbf1
1370184_at	0.0099124	0.0099124	3.74	-2.2791		0.699466	LOC688430///Cfl1
1368051_at	0.0099215	0.0099215	3.74	-2.28	0.582291	0.582291	Hsd17b12
1389756_at	0.0099484	0.0099484	3.74	-2.2825	1.14365	1.14365	Melk
1370294_a_at	0.009955	0.009955	3.74	-2.2832	0.920929	0.920929	Cdc20
1390208_at	0.0100157	0.0100157	3.73	-2.2889	0.574304	0.574304	Htatip2
1389733_at	0.0100242	0.0100242	3.73	-2.2897	0.642105	0.642105	Mars
1392939_at	0.0100311	0.0100311	-3.73	-2.2903	0.66148	-0.66148	Slc41a3
1392407_at	0.0101186	0.0101186	3.72	-2.2984	0.772452	0.772452	Arhgap30
1371089_at	0.0101415	0.0101415	-3.72	-2.3005	2.80415	-2.80415	Gsta3
1389302_at	0.0101489	0.0101489	3.72	-2.3012	0.513851	0.513851	Ino80c
1372959_at	0.0101666	0.0101666	-3.72	-2.3029	0.623635	-0.623635	Nme4
1375936_at	0.0101687	0.0101687	-3.72	-2.3031	0.672849	-0.672849	Dsc2
1371577_at	0.0101812	0.0101812	-3.72	-2.3042	0.54397	-0.54397	Ndufs1
1383157_at	0.0102269	0.0102269	-3.71	-2.3084	0.602519	-0.602519	Mrpl44
1382061_at	0.0102319	0.0102319	-3.71	-2.3089	0.615266	-0.615266	Ldhd
1386986_at	0.0102324	0.0102324	3.71	-2.3089	1.19203	1.19203	Ogfr
1390707_at	0.0102495	0.0102495	3.71	-2.3105	0.857243	0.857243	Rgs10
1388387_at	0.0102686	0.0102686	-3.71	-2.3122	0.566561	-0.566561	Ubac1
1371445_at	0.0103007	0.0103007	3.71	-2.3152	0.784075	0.784075	Lrrc59
1370290_at	0.0103137	0.0103137	3.71	-2.3163	0.788883	0.788883	Tubb5
1373026_at	0.0103148	0.0103148	3.71	-2.3164	1.45433	1.45433	Spc24
1370297_at	0.0103447	0.0103447	3.7	-2.3192	0.912827	0.912827	Plk1
1387657_at	0.0103663	0.0103663	-3.7	-2.3211	1.11647	-1.11647	Kif3c
1368783_at	0.0103735	0.0103735	3.7	-2.3218	0.857128	0.857128	Icos
1380517_at	0.0103936	0.0103936	3.7	-2.3236	1.72692	1.72692	Zmym3
1373236_at	0.0103987	0.0103987	-3.7	-2.324	1.99411	-1.99411	Ppcdc
1375148_at	0.0104034	0.0104034	-3.7	-2.3245	1.28092	-1.28092	Zfpm1
1387086_at	0.0104654	0.0104654	3.69	-2.33	0.631219	0.631219	Camlg
1368489_at	0.0104841	0.0104841	3.69	-2.3317	0.79313	0.79313	Fosl1
1373684_at	0.0105652	0.0105652	-3.68	-2.3389	0.7412	-0.7412	Klhl31
1371071_at	0.0105906	0.0105906	3.68	-2.3412	0.935564	0.935564	Gnb4
1371436_at	0.0105945	0.0105945	-3.68	-2.3415	0.976117	-0.976117	Ddah2
1372715_at	0.0107426	0.0107426	3.67	-2.3546	0.638178	0.638178	Sfxn1
1367846_at	0.0107528	0.0107528	3.67	-2.3555	1.00398	1.00398	S100a4
1369581_at	0.0107647	0.0107647	3.67	-2.3565	0.948195	0.948195	Pemt
1368283_at	0.0108578	0.0108578	-3.66	-2.3646	0.761942	-0.761942	Ehhadh
1375612_at	0.0109007	0.0109007	3.66	-2.3683	0.52055	0.52055	Hnrnpa1
1388089_a_at	0.0109155	0.0109155	3.66	-2.3696	0.510673	0.510673	Rnf4
1368328_at	0.0110002	0.0110002	-3.65	-2.3768	2.27544	-2.27544	Gys2
1373489_at	0.0110009	0.0110009	3.65	-2.3769	1.60213	1.60213	Chaf1a
1372383_at	0.0110025	0.0110025	-3.65	-2.377	0.614219	-0.614219	Gpsm1
1398417_at	0.0110067	0.0110067	-3.65	-2.3774	0.559062	-0.559062	Fem1a
1367631_at	0.0110257	0.0110257	3.65	-2.379	0.803601	0.803601	Ctgf
1369677_at	0.0110379	0.0110379	-3.65	-2.38	0.850688	-0.850688	Cnr1
1377179_at	0.0111562	0.0111562	3.64	-2.3901	0.856616	0.856616	Pqlc2
1369952_at	0.0111595	0.0111595	3.64	-2.3903	0.623146	0.623146	Pabpc1
1372612_at	0.0111676	0.0111676	-3.64	-2.391	0.546444	-0.546444	Dynll2
1369822_at	0.0112007	0.0112007	-3.64	-2.3938	0.863605	-0.863605	Kit
1387481_at	0.0113067	0.0113067	-3.63	-2.4026	2.16934	-2.16934	Nptxr
1371074_a_at	0.0113233	0.0113233	3.63	-2.404	1.3609	1.3609	Mcm6
1368910_at	0.0114032	0.0114032	-3.62	-2.4106	0.595262	-0.595262	Pdp1
1386052_at	0.0114193	0.0114193	-3.62	-2.412	0.834397	-0.834397	Il7r
1368893_at	0.0114385	0.0114385	-3.62	-2.4136	0.75552	-0.75552	Cap2
1371027_at	0.0114763	0.0114763	3.61	-2.4166	0.607501	0.607501	Cblb
1372904_at	0.0115286	0.0115286	3.61	-2.4209	0.538326	0.538326	Mob3a
1388353_at	0.0115734	0.0115734	3.61	-2.4246	0.530574	0.530574	Pa2g4
1377437_at	0.0116194	0.0116194	-3.6	-2.4283	0.757375	-0.757375	Veph1
1388320_at	0.0116475	0.0116475	3.6	-2.4306	1.25476	1.25476	Spint2
1368207_at	0.0116669	0.0116669	3.6	-2.4321	1.13233	1.13233	Fxyd5
1386857_at	0.0116965	0.0116965	3.6	-2.4345		0.629753	RGD1565395///Stmn1
1375990_a_at	0.0117247	0.0117247	-3.6	-2.4368	0.607985	-0.607985	Ppp2r3a
1374379_at	0.0117378	0.0117378	-3.6	-2.4379	1.34179	-1.34179	Dusp23
1389781_at	0.0117493	0.0117493	-3.59	-2.4388	2.17348	-2.17348	Elmod1
1369844_at	0.0117981	0.0117981	3.59	-2.4427	1.18095	1.18095	Gabra3
1387341_a_at	0.0118004	0.0118004	-3.59	-2.4429	0.804077	-0.804077	Mbp
1376927_at	0.0118347	0.0118347	-3.59	-2.4456	0.60144	-0.60144	Lrrc14b
1371717_at	0.0119033	0.0119033	-3.58	-2.451	0.528912	-0.528912	Mfn1
1377239_at	0.0119464	0.0119464	3.58	-2.4544	0.837731	0.837731	Apbb1ip
1398354_at	0.0119966	0.0119966	-3.58	-2.4584	0.518409	-0.518409	Ctnnal1
1373093_at	0.0121265	0.0121265	3.57	-2.4685	1.12241	1.12241	Errfi1
1368479_at	0.012136	0.012136	3.57	-2.4693	0.969692	0.969692	Drd1
1368172_a_at	0.0121367	0.0121367	3.57	-2.4693	1.39783	1.39783	Lox
1368412_a_at	0.0121397	0.0121397	3.57	-2.4695	0.831461	0.831461	Ptpro
1372685_at	0.0121418	0.0121418	3.57	-2.4697	1.2677	1.2677	Cdkn3
1389778_a_at	0.012169	0.012169	3.57	-2.4718	0.730687	0.730687	Tceb3
1370880_at	0.0121759	0.0121759	3.56	-2.4724	0.953874	0.953874	Rnh1
1371090_at	0.0122136	0.0122136	3.56	-2.4753	0.566371	0.566371	Scamp2
1368474_at	0.0122359	0.0122359	3.56	-2.477		0.630207	LOC100912479///Vcam1
1389904_at	0.0122375	0.0122375	3.56	-2.4771	0.607128	0.607128	Actr2
1389158_at	0.0122609	0.0122609	-3.56	-2.4789	0.617021	-0.617021	Arfrp1
1384778_at	0.0122996	0.0122996	3.56	-2.4819	0.56747	0.56747	Ctrc
1373583_at	0.0123112	0.0123112	3.56	-2.4828	0.799633	0.799633	Zfp518b
1370832_at	0.0123643	0.0123643	3.55	-2.4868	0.607084	0.607084	Ccl4
1387851_at	0.0123719	0.0123719	3.55	-2.4874	0.905544	0.905544	Pter
1372404_at	0.0123944	0.0123944	3.55	-2.4891	0.990056	0.990056	Rac2
1376689_at	0.0125383	0.0125383	3.54	-2.5	0.674513	0.674513	Ikbip
1374857_at	0.0125427	0.0125427	3.54	-2.5003	2.18719	2.18719	Gar1
1389858_at	0.0125711	0.0125711	3.54	-2.5025	0.515714	0.515714	Tk1
1374113_at	0.0126776	0.0126776	3.53	-2.5104	0.70837	0.70837	Baz1a
1368410_at	0.0126809	0.0126809	3.53	-2.5107	0.776703	0.776703	Mpg
1372082_at	0.0126999	0.0126999	3.53	-2.5121	0.893414	0.893414	Necap2
1388857_at	0.0127432	0.0127432	3.53	-2.5153	0.945657	0.945657	Sec23b
1369420_at	0.0127886	0.0127886	-3.52	-2.5186	0.571	-0.571	Neu3
1371688_at	0.012811	0.012811	3.52	-2.5203	0.673685	0.673685	Tram1
1393894_at	0.0128254	0.0128254	-3.52	-2.5213	1.42998	-1.42998	Cyp4a8
1367646_at	0.012826	0.012826	3.52	-2.5214	0.602534	0.602534	Ctsb
1372478_at	0.012845	0.012845	3.52	-2.5228	1.05436	1.05436	Cmtm7
1368223_at	0.0129111	0.0129111	3.52	-2.5276	0.779105	0.779105	Adamts1
1390483_at	0.0129343	0.0129343	-3.51	-2.5293	0.598013	-0.598013	Slc25a29
1369260_a_at	0.0129718	0.0129718	-3.51	-2.5321	0.61223	-0.61223	Mpp4
1390163_at	0.0129723	0.0129723	-3.51	-2.5321	0.729284	-0.729284	Wdr92
1389398_at	0.0129795	0.0129795	-3.51	-2.5326	0.712676	-0.712676	Ank1
1387024_at	0.0130075	0.0130075	3.51	-2.5346	1.08705	1.08705	Dusp6
1376437_at	0.0130222	0.0130222	3.51	-2.5357	0.50703	0.50703	Derl2
1367951_at	0.0130359	0.0130359	-3.51	-2.5367	0.82662	-0.82662	Pgam2
1373881_at	0.0130555	0.0130555	3.51	-2.5381	0.687369	0.687369	Arhgdib
1390123_at	0.0130752	0.0130752	-3.51	-2.5395	0.857655	-0.857655	Tmem45b
1368757_at	0.0130911	0.0130911	-3.5	-2.5407	1.21526	-1.21526	Zp3
1387264_at	0.013144	0.013144	3.5	-2.5445		2.48279	LOC100909725///Kcnk6
1370073_at	0.0131888	0.0131888	3.5	-2.5477	1.04581	1.04581	Dnajc3
1370862_at	0.0132363	0.0132363	3.5	-2.5511	0.980347	0.980347	Apoe
1372240_at	0.0133087	0.0133087	-3.49	-2.5563	0.583279	-0.583279	Sgca
1387049_at	0.0133145	0.0133145	-3.49	-2.5567	0.976668	-0.976668	Myh6
1369658_at	0.0133424	0.0133424	3.49	-2.5586	1.81827	1.81827	Cebpa
1371327_a_at	0.0133661	0.0133661	3.49	-2.5603	0.513484	0.513484	Actg1
1374544_at	0.0133731	0.0133731	3.49	-2.5608	1.06094	1.06094	Vsir
1387422_at	0.0134033	0.0134033	3.48	-2.5629	1.75658	1.75658	Pglyrp1
1372889_at	0.0134716	0.0134716	3.48	-2.5677	0.985884	0.985884	Slco2a1
1389925_at	0.0135003	0.0135003	-3.48	-2.5697	1.18209	-1.18209	Gatad1
1389678_at	0.0135143	0.0135143	3.48	-2.5707	1.15401	1.15401	Slc25a48
1373397_at	0.0135175	0.0135175	3.48	-2.5709	0.611276	0.611276	Mapre1
1369366_at	0.0135201	0.0135201	3.48	-2.5711	1.77666	1.77666	Cntn5
1389980_at	0.0135652	0.0135652	3.47	-2.5743	0.69563	0.69563	Cnih4
1388150_at	0.0135982	0.0135982	3.47	-2.5766	0.82926	0.82926	Xpo1
1369768_at	0.0136734	0.0136734	-3.47	-2.5818	0.627354	-0.627354	Hist1h1d
1376701_a_at	0.0136897	0.0136897	3.47	-2.5829	0.539052	0.539052	Rhno1
1374933_at	0.0136933	0.0136933	3.47	-2.5832	0.89668	0.89668	Mcam
1389741_at	0.0137079	0.0137079	3.47	-2.5842	1.92094	1.92094	Cers4
1371054_at	0.0137441	0.0137441	-3.46	-2.5867	1.04288	-1.04288	Pnmt
1373658_at	0.0137534	0.0137534	3.46	-2.5873	0.991542	0.991542	Racgap1
1372423_at	0.013776	0.013776	-3.46	-2.5888	0.652847	-0.652847	Perp
1373490_at	0.0138336	0.0138336	3.46	-2.5928	1.16806	1.16806	Gmfg
1370207_at	0.0138781	0.0138781	-3.46	-2.5958		-0.485432	LOC100361833///Atp5g2
1389911_at	0.0138969	0.0138969	3.45	-2.5971	1.10612	1.10612	Metrnl
1389554_at	0.0139204	0.0139204	3.45	-2.5987	0.878733	0.878733	Nr2f2
1389169_at	0.0139513	0.0139513	-3.45	-2.6008	0.5031	-0.5031	Pgrmc2
1390622_at	0.013953	0.013953	-3.45	-2.6009	0.818051	-0.818051	Cux2
1376852_at	0.0139791	0.0139791	-3.45	-2.6027	0.573272	-0.573272	Mccc1
1376390_at	0.0140176	0.0140176	3.45	-2.6053	0.883049	0.883049	Ms4a6a
1372513_at	0.0140335	0.0140335	3.45	-2.6064	0.60127	0.60127	Rac1
1375980_at	0.0140966	0.0140966	3.44	-2.6106	0.518773	0.518773	Nxn
1371521_at	0.014101	0.014101	3.44	-2.6109	0.540349	0.540349	Sin3b
1373897_at	0.0141269	0.0141269	3.44	-2.6126	0.808855	0.808855	Lmnb1
1398418_at	0.014132	0.014132	-3.44	-2.613	2.65272	-2.65272	Rasl10b
1387270_at	0.0141358	0.0141358	3.44	-2.6132	0.881379	0.881379	Hhex
1387788_at	0.0141745	0.0141745	3.44	-2.6158	0.526749	0.526749	Junb
1368219_at	0.0142009	0.0142009	-3.44	-2.6176		-1.13096	LOC100912455///Clcn2
1367598_at	0.0142525	0.0142525	-3.43	-2.621	0.739834	-0.739834	Ttr
1377201_at	0.0143029	0.0143029	3.43	-2.6243	0.719846	0.719846	Ccsap
1371432_at	0.0143405	0.0143405	3.43	-2.6268	1.0815	1.0815	Vat1
1389539_at	0.0143467	0.0143467	3.43	-2.6272	0.517116	0.517116	Appl1
1393411_at	0.0143604	0.0143604	3.43	-2.6281	2.49757	2.49757	Cfp
1374897_at	0.0143794	0.0143794	3.43	-2.6294	0.819243	0.819243	Alyref
1371368_at	0.0144503	0.0144503	3.42	-2.634	0.984111	0.984111	Sec61a1
1367936_at	0.0144706	0.0144706	3.42	-2.6353	0.859015	0.859015	Stk10
1370737_at	0.0144817	0.0144817	-3.42	-2.6361	0.781178	-0.781178	Casp9
1389902_at	0.0145236	0.0145236	3.42	-2.6388	0.574596	0.574596	Hm13
1389078_at	0.0145369	0.0145369	3.42	-2.6397	0.569	0.569	Fbxl6
1369509_a_at	0.0145611	0.0145611	-3.42	-2.6412	1.62738	-1.62738	A1bg
1376102_at	0.0146217	0.0146217	3.41	-2.6452	0.770356	0.770356	Tmbim1
1368321_at	0.0146433	0.0146433	3.41	-2.6466	0.979422	0.979422	Egr1
1398340_at	0.0146745	0.0146745	-3.41	-2.6486	0.486776	-0.486776	Ccndbp1
1389357_at	0.0147639	0.0147639	-3.41	-2.6543	0.840467	-0.840467	Morc2
1369762_at	0.0147836	0.0147836	3.4	-2.6556	1.10023	1.10023	Pou1f1
1390348_at	0.0147958	0.0147958	3.4	-2.6564	0.820492	0.820492	Folr2
1389448_at	0.0148588	0.0148588	-3.4	-2.6604	0.512601	-0.512601	2021-09-04
1389380_at	0.014879	0.014879	3.4	-2.6617	0.716848	0.716848	Fpgs
1372932_at	0.0149075	0.0149075	3.4	-2.6635	0.697354	0.697354	Rrp1
1372429_at	0.0149187	0.0149187	3.4	-2.6642	0.641507	0.641507	Acd
1368006_at	0.014928	0.014928	3.4	-2.6648	1.01578	1.01578	Laptm5
1383013_at	0.0149483	0.0149483	3.39	-2.6661	0.555166	0.555166	Klf13
1376695_at	0.0149588	0.0149588	3.39	-2.6667	0.839634	0.839634	Palb2
1374342_at	0.0149612	0.0149612	-3.39	-2.6669	0.563466	-0.563466	Ly6g6c
1389543_at	0.0150669	0.0150669	-3.39	-2.6736	0.593747	-0.593747	Masp1
1388930_at	0.0151067	0.0151067	3.39	-2.6761	0.673633	0.673633	Tmem123
1372650_at	0.0151694	0.0151694	-3.38	-2.68	0.483994	-0.483994	Dnmbp
1388459_at	0.0152208	0.0152208	3.38	-2.6832	0.897156	0.897156	Col18a1
1390137_at	0.0152424	0.0152424	3.38	-2.6845	1.35428	1.35428	Knstrn
1367887_at	0.0152556	0.0152556	-3.38	-2.6853	0.705485	-0.705485	Lcat
1375696_at	0.0152759	0.0152759	3.38	-2.6866	0.545689	0.545689	Ifnar1
1388337_at	0.0152821	0.0152821	3.38	-2.687	0.707817	0.707817	Pnp
1374844_at	0.0154054	0.0154054	3.37	-2.6946	0.766909	0.766909	Rbm14
1376272_s_at	0.0154802	0.0154802	3.37	-2.6992	0.630859	0.630859	Tmem167a
1388432_at	0.0154916	0.0154916	-3.37	-2.6999	0.477362	-0.477362	Optn
1368854_at	0.0154929	0.0154929	-3.37	-2.7	0.934343	-0.934343	Vsnl1
1371007_at	0.0155221	0.0155221	-3.36	-2.7017	1.31066	-1.31066	Epha5
1370232_at	0.0155293	0.0155293	-3.36	-2.7022	0.480622	-0.480622	Ivd
1386882_at	0.0155355	0.0155355	3.36	-2.7026	0.800134	0.800134	Dynlt1
1367800_at	0.0155377	0.0155377	3.36	-2.7027		0.568606	LOC100910418///Plat
1388484_at	0.0156571	0.0156571	3.36	-2.7099	0.98843	0.98843	Ube2c
1370723_at	0.0156629	0.0156629	-3.36	-2.7103	1.61209	-1.61209	Grasp
1375166_at	0.0156649	0.0156649	-3.36	-2.7104	1.65857	-1.65857	Mrps26
1368754_at	0.0157773	0.0157773	3.35	-2.7172	0.835337	0.835337	P2ry6
1367661_at	0.0157793	0.0157793	3.35	-2.7173	0.677017	0.677017	S100a6
1388688_at	0.0158155	0.0158155	-3.35	-2.7195	0.54459	-0.54459	Ccser2
1377356_at	0.0158553	0.0158553	3.35	-2.7219	0.802439	0.802439	Gdpd5
1368808_at	0.0159092	0.0159092	3.34	-2.7251	0.8486	0.8486	Cap1
1370871_at	0.015911	0.015911	3.34	-2.7252	0.694697	0.694697	Hnrnpa3
1369162_at	0.0159263	0.0159263	-3.34	-2.7261	1.25582	-1.25582	Gucy2c
1375053_at	0.0159326	0.0159326	-3.34	-2.7265	0.518248	-0.518248	Pknox2
1387269_s_at	0.0159596	0.0159596	3.34	-2.7281	2.46935	2.46935	Plaur
1371011_at	0.0159747	0.0159747	-3.34	-2.729		-0.774604	Vom2r46///Vom2r44
1369486_at	0.0159871	0.0159871	-3.34	-2.7297	0.611964	-0.611964	Asz1
1371966_at	0.0160028	0.0160028	-3.34	-2.7306	0.549932	-0.549932	Pcmt1
1368134_a_at	0.01601	0.01601	3.34	-2.7311	0.527269	0.527269	Il4r
1398270_at	0.0160219	0.0160219	3.34	-2.7318	0.623027	0.623027	Bmp2
1373377_at	0.0160843	0.0160843	-3.34	-2.7355	0.528967	-0.528967	Scnm1
1373948_at	0.0161365	0.0161365	-3.33	-2.7385	0.568566	-0.568566	Nprl3
1368683_at	0.0162095	0.0162095	3.33	-2.7428	2.11661	2.11661	Olr1
1373672_at	0.016243	0.016243	3.33	-2.7448	0.684118	0.684118	Serpinb9
1373522_at	0.0162615	0.0162615	3.33	-2.7458	0.66465	0.66465	Senp1
1374401_at	0.0162639	0.0162639	3.33	-2.746	0.921087	0.921087	Snx2
1376190_at	0.0163493	0.0163493	3.32	-2.7509	0.723345	0.723345	Pik3r2
1371936_at	0.0163832	0.0163832	3.32	-2.7529		0.753879	LOC500654///Eif4a1
1370007_at	0.0163887	0.0163887	3.32	-2.7532	0.943856	0.943856	Pdia4
1369944_at	0.0164117	0.0164117	3.32	-2.7546		0.63573	LOC102550530///LOC100911158///Marcksl1
1368210_at	0.0164842	0.0164842	3.32	-2.7587	0.652957	0.652957	Il24
1375869_at	0.0165662	0.0165662	-3.31	-2.7634	0.504284	-0.504284	Ulk1
1377314_at	0.0165802	0.0165802	-3.31	-2.7642	1.73342	-1.73342	LOC102554877
1373831_at	0.016709	0.016709	3.3	-2.7716	0.931171	0.931171	LOC619574
1372793_at	0.0167299	0.0167299	3.3	-2.7728	0.445141	0.445141	Ssbp1
1388958_a_at	0.0167445	0.0167445	-3.3	-2.7736	0.69121	-0.69121	Slc2a4
1388455_at	0.0167471	0.0167471	3.3	-2.7737	0.801081	0.801081	Gng10
1387999_at	0.0167771	0.0167771	-3.3	-2.7754	1.55953	-1.55953	Slc18a1
1389985_at	0.0167837	0.0167837	3.3	-2.7758	2.18201	2.18201	Tfe3
1388913_at	0.0167841	0.0167841	3.3	-2.7758	1.52627	1.52627	Plpp2
1376512_at	0.0168138	0.0168138	-3.3	-2.7775	0.628664	-0.628664	Mrm2
1377773_at	0.0168292	0.0168292	-3.3	-2.7784	0.743652	-0.743652	Gabrb2
1372158_at	0.0168413	0.0168413	-3.3	-2.7791	0.60527	-0.60527	Macrod1
1372013_at	0.0168972	0.0168972	3.29	-2.7822	0.933022	0.933022	Ifitm1
1376296_at	0.0169183	0.0169183	-3.29	-2.7834	0.753184	-0.753184	LOC100911217
1388669_at	0.0169327	0.0169327	3.29	-2.7842	0.492274	0.492274	Sf3a3
1369837_at	0.0169561	0.0169561	-3.29	-2.7855	0.875907	-0.875907	Gulo
1388697_at	0.0169892	0.0169892	-3.29	-2.7874	0.469013	-0.469013	Inpp5a
1367715_at	0.0170238	0.0170238	3.29	-2.7893	0.640319	0.640319	Tnfrsf1a
1379335_at	0.0170911	0.0170911	3.29	-2.793	0.67336	0.67336	Paip1
1368098_a_at	0.0171119	0.0171119	-3.28	-2.7942		-0.595251	LOC688682///Snurf///Snrpn
1369268_at	0.0171239	0.0171239	3.28	-2.7949	2.00379	2.00379	Atf3
1376737_at	0.0171431	0.0171431	3.28	-2.7959	0.469463	0.469463	LOC100912041
1372682_at	0.0172038	0.0172038	-3.28	-2.7993	0.945165	-0.945165	Tmem246
1388859_at	0.0172253	0.0172253	-3.28	-2.8004	0.584865	-0.584865	Cby1
1398832_at	0.0172604	0.0172604	3.28	-2.8024	0.570635	0.570635	Ncl
1388763_at	0.0173498	0.0173498	3.27	-2.8073	0.728128	0.728128	Cnn2
1376175_at	0.0173741	0.0173741	-3.27	-2.8086	0.666411	-0.666411	Gbas
1387076_at	0.0173888	0.0173888	3.27	-2.8094	0.757787	0.757787	Hif1a
1375326_at	0.0173962	0.0173962	-3.27	-2.8098	1.14757	-1.14757	Cdk2ap1
1369993_at	0.0174131	0.0174131	-3.27	-2.8107		-0.527058	LOC100909586///Camk2g
1369863_at	0.0174843	0.0174843	-3.27	-2.8146	0.911639	-0.911639	Adh4
1370214_at	0.0175003	0.0175003	-3.27	-2.8155	2.01146	-2.01146	Pvalb
1384019_a_at	0.0175223	0.0175223	3.27	-2.8167	0.874229	0.874229	Phf20
1387798_a_at	0.0175639	0.0175639	3.26	-2.8189	0.529359	0.529359	Cr1l
1370243_a_at	0.0176219	0.0176219	3.26	-2.8221		0.520098	LOC100359583///Ptma
1368204_at	0.0176683	0.0176683	3.26	-2.8246		1.21118	LOC100911727///Lig1
1369670_at	0.017677	0.017677	3.26	-2.825	0.504279	0.504279	Cd200
1373949_at	0.0177035	0.0177035	3.26	-2.8264	0.673539	0.673539	Atp13a2
1387859_at	0.0177083	0.0177083	-3.26	-2.8267		-0.719852	LOC100911034///Nfs1
1398458_at	0.0177176	0.0177176	-3.26	-2.8272	0.834107	-0.834107	Wnk2
1374954_at	0.0178058	0.0178058	-3.25	-2.8319	0.649053	-0.649053	Hdac11
1371258_at	0.0178133	0.0178133	3.25	-2.8323	1.25417	1.25417	Fga
1371976_at	0.0178569	0.0178569	-3.25	-2.8346	0.64512	-0.64512	Mcrip2
1368682_at	0.0178979	0.0178979	-3.25	-2.8368	1.6885	-1.6885	Sv2a
1386961_at	0.0179355	0.0179355	-3.25	-2.8388	0.759064	-0.759064	Pfkm
1388408_at	0.0181139	0.0181139	3.24	-2.8482	0.704375	0.704375	Prr13
1375442_at	0.0181229	0.0181229	3.24	-2.8487	2.37142	2.37142	Mphosph10
1367793_at	0.0182267	0.0182267	-3.23	-2.8541	0.547546	-0.547546	Ddt
1370057_at	0.0182285	0.0182285	3.23	-2.8542	0.541242	0.541242	Csrp1
1368646_at	0.0182765	0.0182765	-3.23	-2.8567	0.499772	-0.499772	Mapk9
1369473_at	0.0183498	0.0183498	-3.23	-2.8605	0.445561	-0.445561	Pgm1
1371230_x_at	0.0183921	0.0183921	-3.23	-2.8627	0.998051	-0.998051	Atpif1
1371088_at	0.0184019	0.0184019	-3.23	-2.8632	0.580011	-0.580011	Capn9
1367706_at	0.0184065	0.0184065	-3.23	-2.8634		-0.50441	LOC683062///Vdac1
1368975_at	0.0184637	0.0184637	3.22	-2.8664	0.817301	0.817301	Cd38
1387251_at	0.0185455	0.0185455	3.22	-2.8706	1.37998	1.37998	Msmb
1370348_at	0.0186211	0.0186211	3.22	-2.8744	0.568185	0.568185	Ninj1
1374166_at	0.018664	0.018664	-3.21	-2.8766	0.610831	-0.610831	Adprhl1
1377306_at	0.0187082	0.0187082	-3.21	-2.8789	0.539174	-0.539174	LOC102551716
1376793_at	0.0187169	0.0187169	3.21	-2.8793	0.866601	0.866601	Mfsd14b
1367713_at	0.0187279	0.0187279	3.21	-2.8799	0.519603	0.519603	Eif2s1
1390197_at	0.0187755	0.0187755	3.21	-2.8823	0.505337	0.505337	Brat1
1368919_at	0.0190526	0.0190526	3.2	-2.8962	1.21121	1.21121	Pgf
1390421_at	0.0190619	0.0190619	3.2	-2.8967	2.41895	2.41895	Hoga1
1390434_at	0.0190807	0.0190807	3.2	-2.8976	0.601841	0.601841	Tradd
1374235_at	0.0190973	0.0190973	-3.2	-2.8984	0.530913	-0.530913	Rcan2
1373767_at	0.0192096	0.0192096	3.19	-2.904	0.903545	0.903545	Zfand2a
1370947_at	0.0192333	0.0192333	3.19	-2.9052	0.489745	0.489745	Setd4
1368530_at	0.0192915	0.0192915	3.19	-2.908	2.5114	2.5114	Mmp12
1387202_at	0.0192917	0.0192917	3.19	-2.908	1.13381	1.13381	Icam1
1376728_at	0.0193054	0.0193054	3.19	-2.9087	0.663371	0.663371	Rbm47
1389816_at	0.019489	0.019489	-3.18	-2.9177	0.454149	-0.454149	Endog
1387162_at	0.0195045	0.0195045	3.18	-2.9185	1.31649	1.31649	Tpsab1
1374816_at	0.0195323	0.0195323	-3.18	-2.9198	0.612872	-0.612872	Myzap
1370555_at	0.0195399	0.0195399	-3.18	-2.9202	0.627439	-0.627439	Nalcn
1370629_at	0.0195599	0.0195599	3.18	-2.9212	0.94865	0.94865	Art2b
1388778_at	0.0196194	0.0196194	-3.17	-2.9241	0.596344	-0.596344	Ppm1k
1392033_a_at	0.0196551	0.0196551	-3.17	-2.9258	1.75398	-1.75398	Pank2
1369003_at	0.0196588	0.0196588	3.17	-2.926	1.45614	1.45614	Dedd
1367590_at	0.0196707	0.0196707	3.17	-2.9265	0.645874	0.645874	Ran
1390865_at	0.0196887	0.0196887	3.17	-2.9274	1.50453	1.50453	Cadps2
1368539_at	0.0197102	0.0197102	-3.17	-2.9285	1.38988	-1.38988	Scn9a
1388699_at	0.0197162	0.0197162	3.17	-2.9287	0.568588	0.568588	Man2b1
1367875_at	0.0197489	0.0197489	3.17	-2.9303	0.525263	0.525263	Gak
1376214_at	0.0197547	0.0197547	-3.17	-2.9306	0.790068	-0.790068	Mmachc
1376321_at	0.0197638	0.0197638	3.17	-2.931	0.782213	0.782213	Piezo1
1387433_a_at	0.0197888	0.0197888	-3.17	-2.9322	0.770982	-0.770982	Slc25a27
1374943_at	0.0197987	0.0197987	-3.17	-2.9327	0.535611	-0.535611	Fam210b
1389054_at	0.0198176	0.0198176	-3.17	-2.9336	0.572565	-0.572565	LOC498368
1387186_at	0.0198704	0.0198704	3.16	-2.9361	0.590878	0.590878	Rab9a
1375026_at	0.0198743	0.0198743	-3.16	-2.9363	1.22548	-1.22548	Calml4
1370083_at	0.0198749	0.0198749	3.16	-2.9364	1.11481	1.11481	Ccr1
1375241_at	0.0198751	0.0198751	-3.16	-2.9364	1.96595	-1.96595	Mcat
1376076_at	0.0198803	0.0198803	3.16	-2.9366	0.584573	0.584573	Hilpda
1398272_at	0.0198887	0.0198887	-3.16	-2.937	1.67685	-1.67685	B4galnt1
1370811_at	0.0198947	0.0198947	-3.16	-2.9373	0.419035	-0.419035	Mpst
1383065_at	0.0198974	0.0198974	-3.16	-2.9374	0.610202	-0.610202	Nicn1
1368566_a_at	0.0199099	0.0199099	-3.16	-2.938	0.505723	-0.505723	Ndufv3
1369974_at	0.0199569	0.0199569	-3.16	-2.9403	0.55282	-0.55282	Vamp2
1372533_at	0.0199698	0.0199698	3.16	-2.9409	1.17174	1.17174	Edem1
1389843_at	0.0199971	0.0199971	3.16	-2.9422	0.798539	0.798539	Brd2
1374388_at	0.0200337	0.0200337	3.16	-2.9439	0.802138	0.802138	Efhd2
1372372_at	0.0200924	0.0200924	-3.16	-2.9467	0.597409	-0.597409	Cmbl
1391384_at	0.020104	0.020104	3.16	-2.9473	1.96359	1.96359	Tnf
1388118_at	0.0202555	0.0202555	-3.15	-2.9544	0.475263	-0.475263	Hibadh
1372402_at	0.0203269	0.0203269	3.15	-2.9577	0.525422	0.525422	Nans
1372125_at	0.0203536	0.0203536	3.15	-2.959	0.427409	0.427409	Gpx7
1371539_at	0.020357	0.020357	3.15	-2.9592	0.794407	0.794407	Nhp2
1389377_at	0.0204312	0.0204312	-3.14	-2.9626	0.430579	-0.430579	Insig2
1370853_at	0.0204435	0.0204435	-3.14	-2.9632	0.672547	-0.672547	Camk2n1
1371736_at	0.0204986	0.0204986	-3.14	-2.9657	0.499333	-0.499333	Smim20
1382932_at	0.0205964	0.0205964	3.14	-2.9703	1.02992	1.02992	Dnaaf1
1371923_at	0.0205992	0.0205992	3.14	-2.9704	0.592048	0.592048	Lpcat1
1389451_at	0.0206373	0.0206373	3.13	-2.9722	0.919912	0.919912	Slc52a2
1374959_at	0.0206529	0.0206529	-3.13	-2.9729	0.52143	-0.52143	Nqo2
1374551_at	0.0206927	0.0206927	3.13	-2.9747	0.581687	0.581687	Ifi35
1387532_at	0.0207007	0.0207007	-3.13	-2.9751	1.36649	-1.36649	Fgf3
1385665_at	0.0207044	0.0207044	-3.13	-2.9753	1.94483	-1.94483	Adam19
1367619_at	0.0208257	0.0208257	3.13	-2.9808	0.590816	0.590816	Pgrmc1
1390672_at	0.0208824	0.0208824	-3.13	-2.9834	0.57223	-0.57223	Rprm
1377656_at	0.0208956	0.0208956	3.12	-2.984	0.823584	0.823584	Mak16
1389089_at	0.0209078	0.0209078	3.12	-2.9845	0.732266	0.732266	Slc39a7
1375889_at	0.0209264	0.0209264	3.12	-2.9854	0.787068	0.787068	Sms
1370982_at	0.0209483	0.0209483	-3.12	-2.9864	0.413262	-0.413262	Pygm
1372580_at	0.0209598	0.0209598	3.12	-2.9869	0.722327	0.722327	Madd
1390391_at	0.0210112	0.0210112	3.12	-2.9892	0.450446	0.450446	Pfkfb3
1370155_at	0.0211211	0.0211211	3.12	-2.9942	0.818513	0.818513	Col1a2
1368742_at	0.0211405	0.0211405	3.12	-2.9951	0.808161	0.808161	C5ar1
1377163_at	0.0211547	0.0211547	3.11	-2.9957	0.745425	0.745425	Inhbb
1390311_at	0.0212001	0.0212001	-3.11	-2.9978	0.555081	-0.555081	Ttl
1388866_at	0.0213705	0.0213705	-3.11	-3.0054	0.572743	-0.572743	Sspn
1385243_at	0.0214264	0.0214264	3.1	-3.0079	0.850905	0.850905	Maf
1367795_at	0.0214316	0.0214316	3.1	-3.0081	0.660224	0.660224	Ifrd1
1383912_at	0.0215081	0.0215081	3.1	-3.0115	0.819128	0.819128	Abracl
1374518_at	0.0215514	0.0215514	3.1	-3.0134	0.593679	0.593679	Dram2
1387206_at	0.021658	0.021658	3.1	-3.0181	0.664629	0.664629	B4galt6
1373640_at	0.0216626	0.0216626	3.1	-3.0183	0.818692	0.818692	Pycr2
1398849_at	0.0216669	0.0216669	3.1	-3.0185		0.48616	LOC100361558///H3f3b
1370807_at	0.021699	0.021699	3.09	-3.0199	0.724601	0.724601	Vmp1
1376419_at	0.021706	0.021706	3.09	-3.0202	1.34382	1.34382	LOC100912851
1394340_at	0.0217232	0.0217232	-3.09	-3.021	0.440975	-0.440975	Inpp1
1389006_at	0.0217818	0.0217818	3.09	-3.0235	1.32089	1.32089	Mpeg1
1373298_at	0.0217891	0.0217891	3.09	-3.0238	0.808405	0.808405	Ubash3b
1371663_at	0.0217937	0.0217937	3.09	-3.024	0.448507	0.448507	Mfsd5
1376672_at	0.0217998	0.0217998	-3.09	-3.0243	0.499626	-0.499626	Prox1
1398313_a_at	0.0218536	0.0218536	-3.09	-3.0267	0.760272	-0.760272	Kcnk3
1373638_at	0.0219148	0.0219148	-3.09	-3.0293	0.82389	-0.82389	RGD1560854
1371746_at	0.0219689	0.0219689	-3.09	-3.0317	0.60646	-0.60646	Srl
1393516_at	0.021977	0.021977	3.08	-3.032	0.871204	0.871204	Slc16a12
1369757_at	0.02201	0.02201	-3.08	-3.0334	0.603569	-0.603569	Itpkb
1375324_at	0.0220158	0.0220158	-3.08	-3.0337	0.59189	-0.59189	Cltb
1373547_at	0.0220544	0.0220544	-3.08	-3.0354	0.50276	-0.50276	RGD1308147
1388692_at	0.0221088	0.0221088	-3.08	-3.0377	0.484911	-0.484911	Alkbh7
1369290_at	0.022117	0.022117	3.08	-3.0381	0.887491	0.887491	Ccr5
1373499_at	0.0221815	0.0221815	3.08	-3.0408	0.616468	0.616468	Gas5
1377099_at	0.0222133	0.0222133	-3.08	-3.0422	0.616057	-0.616057	RGD1560559
1373696_at	0.0222285	0.0222285	-3.08	-3.0428	0.544668	-0.544668	LOC100910558
1393697_at	0.0222367	0.0222367	-3.08	-3.0432	0.60735	-0.60735	Gdf11
1398758_at	0.0222415	0.0222415	3.08	-3.0434	0.570004	0.570004	Arf4
1370968_at	0.0223562	0.0223562	3.07	-3.0483	0.453587	0.453587	Nfkb1
1376949_at	0.0224381	0.0224381	3.07	-3.0518	0.716312	0.716312	Rce1
1398766_at	0.0225072	0.0225072	3.07	-3.0547	0.547101	0.547101	Rpn1
1373659_at	0.0225262	0.0225262	-3.07	-3.0555	0.918145	-0.918145	Smim5
1387128_at	0.0225536	0.0225536	3.06	-3.0567	0.72614	0.72614	Adcy3
1389074_at	0.0226331	0.0226331	3.06	-3.06	0.608087	0.608087	Fchsd2
1369950_at	0.0226889	0.0226889	3.06	-3.0624	0.60309	0.60309	Cdk4
1387816_at	0.0226938	0.0226938	-3.06	-3.0626	0.951612	-0.951612	Igfals
1372695_at	0.0227082	0.0227082	-3.06	-3.0632	0.506744	-0.506744	Fndc5
1371917_at	0.0227341	0.0227341	-3.06	-3.0643	1.22294	-1.22294	Trmu
1389187_at	0.0227434	0.0227434	-3.06	-3.0646	0.764912	-0.764912	Micall1
1371364_a_at	0.0227811	0.0227811	-3.06	-3.0662	1.80402	-1.80402	Andpro
1398669_at	0.0227868	0.0227868	-3.06	-3.0665	0.541382	-0.541382	Asun
1398937_at	0.0228004	0.0228004	3.06	-3.067		0.475387	LOC100910750///Dhx15
1388449_at	0.0228064	0.0228064	3.06	-3.0673	0.456904	0.456904	Eef1b2
1398426_at	0.022812	0.022812	-3.06	-3.0675	0.535834	-0.535834	Vash2
1398413_at	0.0228393	0.0228393	-3.05	-3.0687	1.53776	-1.53776	Zfp444
1375679_at	0.0228705	0.0228705	3.05	-3.0699	0.879474	0.879474	RGD1307235
1376446_at	0.022874	0.022874	-3.05	-3.0701	0.754657	-0.754657	Mavs
1370229_at	0.0229038	0.0229038	-3.05	-3.0713	0.49062	-0.49062	Ndrg4
1370000_at	0.0229551	0.0229551	3.05	-3.0735	0.627811	0.627811	Nucb2
1388661_at	0.0230181	0.0230181	-3.05	-3.0761	1.07894	-1.07894	Mtfp1
1389109_at	0.0230441	0.0230441	3.05	-3.0771	0.712534	0.712534	Pip4k2a
1390292_at	0.0230617	0.0230617	3.05	-3.0779	0.754653	0.754653	Tmem8a
1369979_at	0.0230826	0.0230826	3.05	-3.0787	0.720311	0.720311	Skap2
1372374_at	0.0231484	0.0231484	3.04	-3.0814	2.16173	2.16173	Car1
1398965_at	0.0231798	0.0231798	-3.04	-3.0827	0.460804	-0.460804	Golga4
1371020_at	0.0232346	0.0232346	-3.04	-3.085	0.666691	-0.666691	Rimbp2
1372016_at	0.0232899	0.0232899	3.04	-3.0873	0.619864	0.619864	Gadd45b
1377719_a_at	0.0233117	0.0233117	-3.04	-3.0881	0.494049	-0.494049	Myh1
1373245_at	0.0233129	0.0233129	3.04	-3.0882	0.507652	0.507652	Col4a1
1372202_at	0.0234516	0.0234516	-3.03	-3.0938	0.567774	-0.567774	RGD1310553
1398249_at	0.0234755	0.0234755	-3.03	-3.0948	0.601312	-0.601312	Slc25a20
1369635_at	0.0234931	0.0234931	-3.03	-3.0955	0.536899	-0.536899	Sord
1369842_at	0.0234935	0.0234935	3.03	-3.0955	2.36412	2.36412	Asic5
1373106_at	0.023496	0.023496	3.03	-3.0956	0.627699	0.627699	Zfp36l2
1369461_at	0.0235867	0.0235867	-3.03	-3.0993	1.50111	-1.50111	Pth2r
1389171_at	0.0235961	0.0235961	-3.03	-3.0997	0.505348	-0.505348	Tmem38a
1389624_s_at	0.0235985	0.0235985	-3.03	-3.0998	0.422229	-0.422229	Exoc3
1389747_at	0.0236018	0.0236018	3.03	-3.0999	0.542393	0.542393	Slc26a8
1388597_at	0.0236155	0.0236155	-3.03	-3.1005	0.522246	-0.522246	Mybpc3
1375260_at	0.0236254	0.0236254	-3.03	-3.1009	1.83435	-1.83435	Mtrf1l
1372280_at	0.0236363	0.0236363	-3.03	-3.1013		-0.739485	LOC100909439///Asb2
1371529_at	0.0236414	0.0236414	3.03	-3.1015	1.98423	1.98423	Ripk1
1373677_at	0.0236492	0.0236492	3.03	-3.1018	0.476976	0.476976	Slc39a10
1368718_at	0.0237476	0.0237476	-3.02	-3.1058	0.974647	-0.974647	Aldh1a7
1374929_at	0.0237614	0.0237614	-3.02	-3.1063	0.572281	-0.572281	Ccdc126
1387483_at	0.0237846	0.0237846	3.02	-3.1073	0.652368	0.652368	Plcg2
1370648_a_at	0.0238241	0.0238241	-3.02	-3.1088	0.860328	-0.860328	Wipf3
1372186_a_at	0.0238847	0.0238847	3.02	-3.1113	0.638696	0.638696	Top2a
1387172_a_at	0.0239223	0.0239223	3.02	-3.1128	0.630116	0.630116	Tgfb2
1367626_at	0.0239755	0.0239755	-3.02	-3.1149	0.483223	-0.483223	Ckm
1376703_at	0.0239998	0.0239998	3.02	-3.1158	0.417946	0.417946	Nup37
1372863_at	0.0240435	0.0240435	3.01	-3.1176	0.464011	0.464011	Mycbp2
1375855_at	0.0241155	0.0241155	-3.01	-3.1204	0.5337	-0.5337	Epdr1
1370346_at	0.0241698	0.0241698	3.01	-3.1226	0.615357	0.615357	Ccnb1
1368465_at	0.0242467	0.0242467	-3.01	-3.1256	1.05477	-1.05477	Asic2
1388741_at	0.0242666	0.0242666	-3.01	-3.1264	0.447512	-0.447512	Cmya5
1372684_at	0.0242863	0.0242863	-3.01	-3.1272	0.476773	-0.476773	Smtn
1371531_at	0.0243046	0.0243046	-3.01	-3.1279	0.555255	-0.555255	Fam127c
1373611_at	0.0243141	0.0243141	3.01	-3.1282	0.749664	0.749664	Il17ra
1374046_at	0.0243353	0.0243353	-3	-3.1291	1.63821	-1.63821	Hs3st2
1388335_at	0.0243428	0.0243428	3	-3.1294	0.519682	0.519682	Tagln2
1374345_at	0.0243515	0.0243515	3	-3.1297	2.24061	2.24061	Psca
1379874_at	0.0244073	0.0244073	-3	-3.1319	0.481659	-0.481659	Mrpl51
1377355_at	0.0245127	0.0245127	-3	-3.136	0.666599	-0.666599	RGD1306750
1387370_at	0.0245181	0.0245181	-3	-3.1362	0.537488	-0.537488	Tmod1
1379268_at	0.0245592	0.0245592	-3	-3.1378	0.450913	-0.450913	Cyhr1
1374499_at	0.0245911	0.0245911	3	-3.139	0.487487	0.487487	Aida
1374539_at	0.0246312	0.0246312	3	-3.1406	0.447559	0.447559	Atp10d
1368309_at	0.0246507	0.0246507	-2.99	-3.1413	0.432607	-0.432607	Txnrd2
1373914_at	0.0247324	0.0247324	2.99	-3.1445	0.584042	0.584042	Clec11a
1390152_at	0.0247357	0.0247357	2.99	-3.1446	0.628951	0.628951	Tmed7
1371603_at	0.0247717	0.0247717	2.99	-3.146	0.467256	0.467256	Prr3
1372322_at	0.0247867	0.0247867	-2.99	-3.1466	0.464474	-0.464474	Ecd
1387201_at	0.0248305	0.0248305	2.99	-3.1483	0.761874	0.761874	Rnf138
1377759_at	0.0248478	0.0248478	2.99	-3.1489	0.489128	0.489128	Bid
1376716_at	0.024983	0.024983	-2.98	-3.1541	0.633158	-0.633158	LOC102547411
1386867_at	0.0250063	0.0250063	-2.98	-3.155	0.650145	-0.650145	Mpc1
1371495_at	0.0250497	0.0250497	2.98	-3.1566		0.480604	LOC100909548///M6pr
1371920_at	0.0250689	0.0250689	-2.98	-3.1574	0.437751	-0.437751	Poldip2
1373894_at	0.0251177	0.0251177	2.98	-3.1592	0.552885	0.552885	Rab31
1398265_at	0.0252085	0.0252085	-2.98	-3.1627	0.423883	-0.423883	Abcc9
1368558_s_at	0.0252247	0.0252247	2.98	-3.1633	1.29391	1.29391	Aif1
1368276_at	0.025254	0.025254	-2.98	-3.1644	0.538949	-0.538949	Syp
1398769_at	0.0252702	0.0252702	2.98	-3.165		0.60238	LOC100910094///Coro1b
1387698_at	0.0252785	0.0252785	-2.97	-3.1653	0.582494	-0.582494	Kcnj11
1371494_at	0.025286	0.025286	-2.97	-3.1656	0.459966	-0.459966	Lancl1
1387106_at	0.0252922	0.0252922	-2.97	-3.1658	0.715626	-0.715626	Sh3bp4
1372213_at	0.0253772	0.0253772	-2.97	-3.169	0.6863	-0.6863	LOC500300
1376573_at	0.0254791	0.0254791	2.97	-3.1728	0.458629	0.458629	Rab34
1370170_at	0.0255769	0.0255769	2.97	-3.1765	0.544328	0.544328	Hnrnpu
1382005_at	0.02558	0.02558	2.97	-3.1766	0.608529	0.608529	Ptbp3
1368589_at	0.0256169	0.0256169	2.96	-3.178	1.19715	1.19715	Ptprj
1369115_at	0.025661	0.025661	-2.96	-3.1796	0.531026	-0.531026	Adrb2
1388570_at	0.0257043	0.0257043	-2.96	-3.1812	0.550044	-0.550044	Coq9
1372004_at	0.0257802	0.0257802	2.96	-3.184	0.755222	0.755222	Hebp1
1370734_a_at	0.025797	0.025797	-2.96	-3.1846	1.79436	-1.79436	Dspp
1375045_at	0.0258059	0.0258059	-2.96	-3.185	0.668821	-0.668821	Wdr59
1398985_at	0.0258143	0.0258143	-2.96	-3.1853	0.62267	-0.62267	Gtpbp1
1374229_at	0.025853	0.025853	2.96	-3.1867	1.3484	1.3484	Sppl2b
1388081_at	0.0258646	0.0258646	2.96	-3.1871	1.29171	1.29171	Olr1867
1376450_at	0.0258773	0.0258773	-2.96	-3.1876	0.546268	-0.546268	Tmem5
1367698_a_at	0.0259544	0.0259544	2.95	-3.1904	0.583297	0.583297	2021-09-09
1387306_a_at	0.0260566	0.0260566	2.95	-3.1942	0.730481	0.730481	Egr2
1370018_at	0.0261093	0.0261093	-2.95	-3.1961	0.536563	-0.536563	Hspb2
1389364_at	0.0261746	0.0261746	2.95	-3.1985	0.543156	0.543156	Ndfip2
1370692_at	0.0261881	0.0261881	2.95	-3.199	1.67311	1.67311	Il1rl1
1372790_at	0.0262523	0.0262523	-2.95	-3.2013	0.523271	-0.523271	Mdh1
1389272_at	0.0262717	0.0262717	-2.94	-3.202	0.752749	-0.752749	LOC102547830
1373996_at	0.0263018	0.0263018	-2.94	-3.2031		-0.623779	LOC100911674///Natd1
1387324_at	0.0263344	0.0263344	-2.94	-3.2043	2.53761	-2.53761	Mak
1374333_at	0.0263661	0.0263661	-2.94	-3.2054	0.438461	-0.438461	Card19
1375633_at	0.0264078	0.0264078	2.94	-3.2069	0.475145	0.475145	Clic1
1370393_at	0.0264166	0.0264166	2.94	-3.2073	2.31922	2.31922	Haus1
1369669_at	0.0264193	0.0264193	2.94	-3.2074	0.955759	0.955759	Nln
1389229_at	0.026431	0.026431	-2.94	-3.2078	0.544574	-0.544574	Pxylp1
1376099_at	0.0264358	0.0264358	2.94	-3.208	0.994871	0.994871	Col5a1
1371939_at	0.0265007	0.0265007	2.94	-3.2103	0.567497	0.567497	Caprin1
1386907_at	0.026606	0.026606	-2.94	-3.2141	0.493326	-0.493326	Eno3
1368475_at	0.0266794	0.0266794	-2.93	-3.2167	0.580916	-0.580916	Colq
1368379_at	0.0267596	0.0267596	2.93	-3.2196	0.898273	0.898273	Scarb2
1374665_at	0.0267677	0.0267677	2.93	-3.2198	0.540315	0.540315	Gemin4
1369915_at	0.02681	0.02681	-2.93	-3.2213	0.510962	-0.510962	Nifk
1375368_at	0.026846	0.026846	-2.93	-3.2226	0.44068	-0.44068	Pgp
1373580_at	0.0268503	0.0268503	-2.93	-3.2228	1.16315	-1.16315	Miga1
1398836_s_at	0.0269173	0.0269173	2.93	-3.2251		0.656888	LOC100361457///Potef///Actg1///Actb
1373785_at	0.0269789	0.0269789	2.92	-3.2273	0.849008	0.849008	Pld4
1374709_at	0.0269818	0.0269818	-2.92	-3.2274	0.676448	-0.676448	Hlf
1372925_at	0.0270707	0.0270707	-2.92	-3.2306	0.509747	-0.509747	Sirt3
1390689_at	0.0270782	0.0270782	2.92	-3.2308	0.621998	0.621998	Rps6kc1
1386926_at	0.0271154	0.0271154	2.92	-3.2321	0.652937	0.652937	Acsl5
1398295_at	0.0271926	0.0271926	-2.92	-3.2348	0.399236	-0.399236	Slc29a1
1374344_at	0.0271965	0.0271965	-2.92	-3.235	0.55554	-0.55554	Plppr3
1388456_at	0.0272404	0.0272404	-2.92	-3.2365	0.558417	-0.558417	S100a1
1385473_x_at	0.0273488	0.0273488	2.91	-3.2403	1.78937	1.78937	Tomm40l
1376504_at	0.0273885	0.0273885	-2.91	-3.2417	1.44053	-1.44053	Adgrb1
1370939_at	0.0274242	0.0274242	-2.91	-3.2429	0.671814	-0.671814	Acsl1
1371872_at	0.0274311	0.0274311	2.91	-3.2432	0.579801	0.579801	Nap1l1
1389227_at	0.027437	0.027437	2.91	-3.2434	0.525154	0.525154	Rhog
1368981_at	0.0275157	0.0275157	2.91	-3.2461	1.19009	1.19009	Aqp4
1385548_at	0.0275327	0.0275327	-2.91	-3.2467	0.57364	-0.57364	Ube2d1
1373346_at	0.0275413	0.0275413	-2.91	-3.247	0.440619	-0.440619	Erlec1
1367801_at	0.0275501	0.0275501	2.91	-3.2473	0.538352	0.538352	Ece1
1369909_s_at	0.0275643	0.0275643	-2.91	-3.2478	0.444284	-0.444284	Tmem150a
1387602_a_at	0.0275679	0.0275679	-2.91	-3.2479	1.1134	-1.1134	Htr3b
1389596_at	0.027575	0.027575	-2.91	-3.2482	0.434915	-0.434915	Cox18
1372289_at	0.0275865	0.0275865	-2.91	-3.2486	0.483337	-0.483337	Slc25a12
1372212_at	0.0275912	0.0275912	2.91	-3.2487	0.478787	0.478787	Paox
1370719_a_at	0.0276229	0.0276229	-2.91	-3.2498	0.450174	-0.450174	Clcc1
1399076_at	0.0276374	0.0276374	2.91	-3.2503	0.711953	0.711953	Ubiad1
1369111_at	0.0278028	0.0278028	-2.9	-3.256	1.18631	-1.18631	Fabp1
1377206_at	0.0278359	0.0278359	2.9	-3.2571	1.02906	1.02906	Lhx1
1368361_a_at	0.027859	0.027859	2.9	-3.2579	0.494896	0.494896	Ptpn2
1386327_at	0.0278783	0.0278783	-2.9	-3.2586	1.0536	-1.0536	Cerkl
1393505_x_at	0.027933	0.027933	-2.9	-3.2604	0.691696	-0.691696	Fam63b
1389113_at	0.0279954	0.0279954	-2.9	-3.2626	0.633016	-0.633016	Slc45a3
1390020_at	0.0280028	0.0280028	-2.9	-3.2628	0.498126	-0.498126	Ogdh
1369884_at	0.0280056	0.0280056	2.9	-3.2629	1.36579	1.36579	Fgf7
1371677_at	0.02809	0.02809	-2.89	-3.2658	0.513159	-0.513159	Spink8
1372638_at	0.0281158	0.0281158	-2.89	-3.2667	0.415743	-0.415743	Arhgef7
1388418_at	0.02814	0.02814	2.89	-3.2675	0.676964	0.676964	Bcl9
1373987_at	0.0281604	0.0281604	-2.89	-3.2682		-0.745126	LOC100911951///Kcnip2
1377263_at	0.028176	0.028176	2.89	-3.2687	0.550678	0.550678	Med7
1399040_at	0.0281873	0.0281873	-2.89	-3.2691	0.631828	-0.631828	Gba2
1382048_at	0.0282455	0.0282455	2.89	-3.2711	0.63758	0.63758	Atp6v1a
1374584_at	0.0282583	0.0282583	2.89	-3.2715	0.503959	0.503959	Stk24
1389885_at	0.0282733	0.0282733	2.89	-3.272	0.593226	0.593226	Limd2
1377524_at	0.0283027	0.0283027	2.89	-3.273	0.877323	0.877323	Mettl26
1368173_at	0.0283314	0.0283314	2.89	-3.2739	0.621834	0.621834	Nop58
1372568_at	0.02835	0.02835	-2.89	-3.2746	0.602068	-0.602068	Epm2aip1
1388517_at	0.0283661	0.0283661	-2.89	-3.2751	0.496021	-0.496021	Mrpl40
1368954_at	0.0284242	0.0284242	2.88	-3.2771	1.05477	1.05477	Pld2
1369009_at	0.028476	0.028476	-2.88	-3.2788	2.38355	-2.38355	Serpinh1
1368000_at	0.0284767	0.0284767	2.88	-3.2788	0.667055	0.667055	C3
1367995_at	0.028487	0.028487	-2.88	-3.2792	0.489615	-0.489615	Cat
1367674_at	0.028492	0.028492	-2.88	-3.2793	0.604316	-0.604316	Pitpnb
1376439_at	0.0285196	0.0285196	2.88	-3.2803	1.22147	1.22147	Lrguk
1375674_at	0.0286162	0.0286162	-2.88	-3.2835	0.537401	-0.537401	Cdip1
1368650_at	0.0286565	0.0286565	2.88	-3.2848	1.06949	1.06949	Klf10
1376377_at	0.0286838	0.0286838	2.88	-3.2857	1.94827	1.94827	Diaph3
1377235_a_at	0.0287814	0.0287814	-2.87	-3.289		-0.393299	LOC100909468///Ppp2r5b
1374204_at	0.0287915	0.0287915	2.87	-3.2893	0.998832	0.998832	Wsb1
1370883_at	0.0287923	0.0287923	2.87	-3.2893	1.01885	1.01885	RT1-Da
1373761_at	0.0289107	0.0289107	2.87	-3.2932		0.594809	LOC100909791///Fam60a
1372364_a_at	0.0290738	0.0290738	2.87	-3.2986	0.487761	0.487761	Ntan1
1389024_at	0.0290858	0.0290858	-2.87	-3.299	0.420625	-0.420625	Scfd2
1387634_a_at	0.0290912	0.0290912	-2.87	-3.2992	2.47971	-2.47971	Amelx
1371785_at	0.0290952	0.0290952	2.87	-3.2993	0.878966	0.878966	Tnfrsf12a
1389617_at	0.0291006	0.0291006	2.87	-3.2995	0.637329	0.637329	Elk3
1369244_at	0.0291193	0.0291193	2.87	-3.3001	0.445865	0.445865	Arnt
1367781_at	0.0291486	0.0291486	-2.86	-3.301	1.2128	-1.2128	Pip
1370189_at	0.0291627	0.0291627	2.86	-3.3015	0.515759	0.515759	Tra2b
1368072_at	0.0291966	0.0291966	2.86	-3.3026	0.486766	0.486766	Btg3
1368362_a_at	0.0292666	0.0292666	2.86	-3.3049	0.624043	0.624043	Asgr2
1368464_at	0.0292667	0.0292667	2.86	-3.3049	0.888611	0.888611	Clec10a
1387283_at	0.0292752	0.0292752	2.86	-3.3052	1.34838	1.34838	Mx2
1367905_at	0.0292788	0.0292788	2.86	-3.3053	0.898281	0.898281	Enpp3
1374593_at	0.0292903	0.0292903	-2.86	-3.3057	0.509465	-0.509465	Prkce
1375461_at	0.0293041	0.0293041	-2.86	-3.3061	0.433951	-0.433951	Atp5sl
1369941_at	0.0293349	0.0293349	2.86	-3.3071	0.456162	0.456162	Dap
1372321_at	0.0293569	0.0293569	2.86	-3.3078	1.87377	1.87377	Lyl1
1372249_at	0.0293671	0.0293671	2.86	-3.3082	0.574285	0.574285	Ywhaz
1368999_a_at	0.0293679	0.0293679	-2.86	-3.3082	0.731322	-0.731322	Begain
1373049_at	0.0293787	0.0293787	2.86	-3.3085	0.499003	0.499003	RGD1562136
1373249_at	0.0294396	0.0294396	-2.86	-3.3105	0.551644	-0.551644	Ubl4a
1388440_at	0.0294756	0.0294756	2.86	-3.3117		0.76098	LOC100911293///LOC691658///Aph1b
1398376_at	0.0295289	0.0295289	2.85	-3.3134	1.06884	1.06884	LOC100365921
1393239_at	0.0295375	0.0295375	2.85	-3.3137	0.573694	0.573694	Mtfr1
1369432_at	0.0296328	0.0296328	-2.85	-3.3168	1.95792	-1.95792	Chrnb2
1369325_at	0.0296641	0.0296641	2.85	-3.3178	0.899183	0.899183	Lyst
1399004_at	0.0296662	0.0296662	-2.85	-3.3178		-0.41341	LOC100910944///Romo1
1389230_at	0.0296755	0.0296755	2.85	-3.3181	0.449782	0.449782	Arrdc3
1389964_at	0.0296981	0.0296981	-2.85	-3.3188		-0.496186	LOC683884///Ndufab1
1377434_at	0.0297134	0.0297134	-2.85	-3.3193	1.05266	-1.05266	Mfrp
1374139_at	0.0297359	0.0297359	2.85	-3.3201	0.968529	0.968529	Cdr2
1372620_at	0.0297384	0.0297384	2.85	-3.3201	0.841873	0.841873	Anp32e
1368174_at	0.0297568	0.0297568	-2.85	-3.3207	0.499843	-0.499843	Egln3
1370342_at	0.0298518	0.0298518	-2.85	-3.3238	0.686609	-0.686609	Kcnk2
1387403_at	0.0298743	0.0298743	2.85	-3.3245	1.77494	1.77494	Rgs8
1375799_at	0.0298896	0.0298896	2.85	-3.325	0.657192	0.657192	Tmem121
1367987_at	0.0298958	0.0298958	2.84	-3.3252	0.404323	0.404323	Rnpep
1368679_a_at	0.0298965	0.0298965	2.84	-3.3252	0.767702	0.767702	Lyn
1370001_at	0.0298971	0.0298971	2.84	-3.3252	0.501503	0.501503	Rab8a
1368468_at	0.0298972	0.0298972	-2.84	-3.3252	0.688021	-0.688021	Cyp11a1
1374782_at	0.0299474	0.0299474	-2.84	-3.3268	0.388329	-0.388329	Rhpn1
1369033_at	0.0299639	0.0299639	-2.84	-3.3273	0.727842	-0.727842	Lhcgr
1367765_at	0.0299664	0.0299664	2.84	-3.3274	0.551904	0.551904	Tcn2
1399061_at	0.0299871	0.0299871	2.84	-3.3281	0.555106	0.555106	LOC683071
1372167_at	0.0300145	0.0300145	2.84	-3.3289		0.715849	Snrpgl2///LOC687679///Snrpg///LOC680394
1393062_at	0.0300196	0.0300196	2.84	-3.3291	1.04378	1.04378	Fam219b
1372736_at	0.0301078	0.0301078	-2.84	-3.3319	0.392027	-0.392027	Agl
1368615_a_at	0.0301311	0.0301311	-2.84	-3.3326	1.0561	-1.0561	Slc18a3
1367892_at	0.0301785	0.0301785	-2.84	-3.3341	0.566316	-0.566316	Pdk2
1388539_at	0.0302804	0.0302804	-2.84	-3.3374	0.481818	-0.481818	Pkp2
1374752_at	0.0303692	0.0303692	2.83	-3.3401	0.532996	0.532996	Mdfic
1374081_at	0.0303846	0.0303846	2.83	-3.3406	0.639346	0.639346	Casc4
1374671_at	0.0303977	0.0303977	2.83	-3.341	1.03417	1.03417	Traf3ip2
1371632_at	0.0304718	0.0304718	2.83	-3.3434	0.803123	0.803123	Coro1c
1373964_at	0.0305018	0.0305018	-2.83	-3.3443	0.733993	-0.733993	LOC100174910
1398910_at	0.030516	0.030516	-2.83	-3.3447	0.517004	-0.517004	Stub1
1373414_at	0.0305254	0.0305254	-2.83	-3.345	0.511806	-0.511806	Tmem59l
1369236_at	0.0305302	0.0305302	2.83	-3.3452	0.526209	0.526209	Prdm4
1368994_a_at	0.0305717	0.0305717	-2.83	-3.3465	0.635459	-0.635459	Ralgapa1
1388465_at	0.0305817	0.0305817	-2.83	-3.3468	0.568796	-0.568796	Fam210a
1369795_at	0.030592	0.030592	-2.83	-3.3471	1.53936	-1.53936	Kcnj12
1372070_at	0.0306735	0.0306735	2.83	-3.3496	0.546275	0.546275	Ifi30
1388961_at	0.0306986	0.0306986	-2.82	-3.3504	0.523894	-0.523894	Itgb1bp2
1367627_at	0.0307151	0.0307151	2.82	-3.3509	0.514274	0.514274	Gatm
1378140_at	0.0307332	0.0307332	2.82	-3.3515	1.18241	1.18241	Arl11
1369072_at	0.0307606	0.0307606	-2.82	-3.3523	1.9713	-1.9713	Adh7
1388261_at	0.030815	0.030815	-2.82	-3.354	1.24821	-1.24821	Drp2
1399158_a_at	0.0308518	0.0308518	2.82	-3.3552		0.950203	LOC300303///Npm1
1390650_at	0.0309195	0.0309195	2.82	-3.3573	0.80261	0.80261	Nup85
1368393_at	0.0309522	0.0309522	2.82	-3.3583	1.7668	1.7668	Cd93
1370443_at	0.0309887	0.0309887	2.82	-3.3594	0.946563	0.946563	Dnase2
1380322_at	0.0309948	0.0309948	-2.82	-3.3596	1.04546	-1.04546	LOC102549032
1367982_at	0.031032	0.031032	-2.82	-3.3607	0.566412	-0.566412	Alas1
1373039_at	0.0310667	0.0310667	-2.82	-3.3618	0.401348	-0.401348	Tomm70
1387200_at	0.0310687	0.0310687	-2.82	-3.3618	1.17228	-1.17228	Olig1
1372970_at	0.0311031	0.0311031	2.81	-3.3629	0.438701	0.438701	Shkbp1
1375445_at	0.0312515	0.0312515	-2.81	-3.3674	0.512694	-0.512694	Ky
1382672_a_at	0.0312588	0.0312588	2.81	-3.3677	1.61834	1.61834	Fer
1375432_at	0.0313779	0.0313779	2.81	-3.3713	0.508927	0.508927	Exosc1
1368772_at	0.031383	0.031383	-2.81	-3.3714	0.458669	-0.458669	Slc4a3
1373114_at	0.0313902	0.0313902	2.81	-3.3717	0.544267	0.544267	Dtx4
1371862_at	0.0314194	0.0314194	2.81	-3.3725	0.59923	0.59923	Rrm1
1370815_at	0.0314223	0.0314223	-2.81	-3.3726	0.939789	-0.939789	Nefh
1369018_at	0.0314696	0.0314696	2.81	-3.3741	1.71287	1.71287	Foxm1
1372411_at	0.0314733	0.0314733	2.81	-3.3742	0.447917	0.447917	Zfpl1
1388326_at	0.0315999	0.0315999	-2.8	-3.378	0.432683	-0.432683	Ndufs8
1387088_at	0.0316235	0.0316235	-2.8	-3.3787	0.830903	-0.830903	Gal
1387161_at	0.0317471	0.0317471	2.8	-3.3824	1.52164	1.52164	Slc1a6
1388201_at	0.0317529	0.0317529	-2.8	-3.3826	0.434669	-0.434669	Bmp6
1368038_at	0.0317926	0.0317926	-2.8	-3.3838	0.667438	-0.667438	Synj2bp
1373883_at	0.0318198	0.0318198	-2.8	-3.3846	0.386215	-0.386215	Cdadc1
1373595_at	0.0318262	0.0318262	2.8	-3.3848	0.471479	0.471479	Tmem43
1368703_at	0.0318279	0.0318279	2.8	-3.3849	0.789172	0.789172	Pdlim5
1370954_at	0.0318338	0.0318338	2.8	-3.385	0.535387	0.535387	P4ha1
1388182_at	0.0319236	0.0319236	2.79	-3.3877	0.944799	0.944799	Prim1
1388160_a_at	0.0319238	0.0319238	-2.79	-3.3877	0.390975	-0.390975	Idh3B
1387091_at	0.0319343	0.0319343	-2.79	-3.388	0.50062	-0.50062	Padi2
1377060_at	0.0319501	0.0319501	-2.79	-3.3885	0.45344	-0.45344	Mccc2
1372344_at	0.0319643	0.0319643	-2.79	-3.3889	0.404901	-0.404901	Hbs1l
1370546_at	0.03204	0.03204	-2.79	-3.3912	0.64898	-0.64898	Unc13c
1374739_at	0.032082	0.032082	2.79	-3.3924	0.643482	0.643482	Cdca4
1370593_at	0.0320864	0.0320864	-2.79	-3.3926	0.811013	-0.811013	Cyp3a2
1368664_at	0.0320868	0.0320868	-2.79	-3.3926	0.675434	-0.675434	LOC56764
1373324_at	0.0321266	0.0321266	2.79	-3.3938	0.606263	0.606263	Dusp14
1388521_at	0.0321444	0.0321444	2.79	-3.3943	0.60037	0.60037	Aldh18a1
1377187_at	0.0321623	0.0321623	2.79	-3.3948	0.465488	0.465488	Rbm12b
1389757_at	0.0321632	0.0321632	-2.79	-3.3948	0.539581	-0.539581	Acad10
1372702_at	0.0321725	0.0321725	-2.79	-3.3951	1.74702	-1.74702	Prp2l1
1387785_at	0.032173	0.032173	2.79	-3.3951	0.504658	0.504658	Mtpn
1371300_at	0.0321774	0.0321774	2.79	-3.3953	0.435654	0.435654	Rpl3
1368988_at	0.0322023	0.0322023	-2.79	-3.396	0.46586	-0.46586	Casq2
1388098_at	0.0322053	0.0322053	2.79	-3.3961	0.619175	0.619175	LOC246267
1398771_at	0.032207	0.032207	2.79	-3.3961	0.598429	0.598429	Slc3a2
1368104_at	0.0322092	0.0322092	2.79	-3.3962	0.720377	0.720377	Tspan2
1370857_at	0.0324343	0.0324343	2.78	-3.4028	0.762102	0.762102	Acta2
1371304_a_at	0.032438	0.032438	2.78	-3.4029		0.410762	Myl6b///Myl6///Myl6l
1373706_at	0.0325	0.0325	2.78	-3.4048	0.434615	0.434615	Smarcal1
1370304_at	0.032506	0.032506	-2.78	-3.4049	0.486565	-0.486565	Timm17a
1375137_at	0.0325105	0.0325105	2.78	-3.4051	0.430285	0.430285	Arpc2
1387819_at	0.0325228	0.0325228	2.78	-3.4054	0.908078	0.908078	Cela1
1387566_at	0.0325295	0.0325295	2.78	-3.4056	0.472362	0.472362	Pla2g4a
1371609_at	0.0326154	0.0326154	-2.78	-3.4081	0.427357	-0.427357	RGD1303003
1393946_at	0.0326264	0.0326264	2.78	-3.4085	0.433572	0.433572	Srsf10
1369433_at	0.0326467	0.0326467	-2.78	-3.4091	1.45773	-1.45773	Cep78
1367742_at	0.0326514	0.0326514	-2.78	-3.4092	0.494863	-0.494863	Cpt1b
1382732_at	0.0326622	0.0326622	2.78	-3.4095	0.944286	0.944286	Lyve1
1389363_at	0.0326651	0.0326651	-2.78	-3.4096	0.463591	-0.463591	Adi1
1376051_at	0.0326798	0.0326798	-2.78	-3.41	0.594221	-0.594221	Cryl1
1398995_at	0.0326952	0.0326952	-2.78	-3.4105	0.445669	-0.445669	Uimc1
1376951_at	0.0326958	0.0326958	2.78	-3.4105	0.675117	0.675117	Mad2l1
1398256_at	0.0327003	0.0327003	2.78	-3.4106	0.780871	0.780871	Il1b
1370942_at	0.0327163	0.0327163	2.78	-3.4111	0.821576	0.821576	Rasa3
1369381_a_at	0.0327376	0.0327376	2.78	-3.4117	1.48392	1.48392	Slc15a1
1376219_at	0.0327431	0.0327431	2.78	-3.4119	0.398229	0.398229	LOC685152
1390435_at	0.0327462	0.0327462	-2.78	-3.412	0.44785	-0.44785	Smim4
1376038_at	0.0327894	0.0327894	2.77	-3.4132	0.51485	0.51485	Tex2
1375871_at	0.0328366	0.0328366	-2.77	-3.4146	0.469842	-0.469842	Slc35b1
1374135_at	0.0328722	0.0328722	2.77	-3.4156	0.403195	0.403195	Ipo4
1388066_a_at	0.0330402	0.0330402	2.77	-3.4205	0.817895	0.817895	Grk6
1375528_at	0.0330746	0.0330746	-2.77	-3.4215	0.429887	-0.429887	Pnpla8
1372310_at	0.0330937	0.0330937	-2.77	-3.422	0.380547	-0.380547	Isoc1
1369555_at	0.0331415	0.0331415	-2.77	-3.4234	0.757627	-0.757627	Ccr4
1390039_at	0.0333123	0.0333123	2.76	-3.4283		0.474688	LOC683192///Zdhhc3
1372595_at	0.0333322	0.0333322	-2.76	-3.4289	0.434244	-0.434244	Actn2
1386912_at	0.0334173	0.0334173	2.76	-3.4313	0.554479	0.554479	Pcolce
1371509_at	0.0334557	0.0334557	2.76	-3.4324		0.518683	LOC100911055///LOC100361475///Tbrg1
1387018_at	0.0334746	0.0334746	-2.76	-3.4329	0.42747	-0.42747	Sorbs2
1370082_at	0.0334801	0.0334801	2.76	-3.4331	1.13561	1.13561	Tgfb1
1368955_at	0.0334895	0.0334895	2.76	-3.4333		0.674393	LOC100910506///Cask
1389727_at	0.0334958	0.0334958	-2.76	-3.4335		-0.664824	LOC100911101///Lrrc10
1387256_at	0.0335717	0.0335717	2.76	-3.4357	0.46303	0.46303	Adam1a
1376704_a_at	0.0336426	0.0336426	2.75	-3.4377	1.36702	1.36702	Ndnl2
1375342_at	0.0337084	0.0337084	-2.75	-3.4396	0.373836	-0.373836	Nfic
1371544_at	0.0337093	0.0337093	2.75	-3.4396	0.666687	0.666687	Erh
1368818_at	0.0337832	0.0337832	-2.75	-3.4417	0.426575	-0.426575	Psme4
1373452_at	0.0338091	0.0338091	2.75	-3.4424	0.529143	0.529143	Rcl1
1372802_at	0.0338404	0.0338404	-2.75	-3.4433	0.408215	-0.408215	Zfp512
1380599_at	0.0338513	0.0338513	-2.75	-3.4436	2.04782	-2.04782	LOC102556485
1374957_at	0.0338722	0.0338722	-2.75	-3.4442	1.50641	-1.50641	Stxbp5
1375932_at	0.0339969	0.0339969	2.75	-3.4477	1.07204	1.07204	Prps2
1389673_at	0.034009	0.034009	-2.75	-3.448	0.407726	-0.407726	Ano5
1379387_at	0.0340205	0.0340205	2.75	-3.4483	0.868745	0.868745	Rgs18
1370136_at	0.0340798	0.0340798	2.74	-3.45	0.45126	0.45126	Lbr
1387887_at	0.0340819	0.0340819	2.74	-3.45	0.458157	0.458157	Rpl14
1368248_at	0.034199	0.034199	-2.74	-3.4533	1.04004	-1.04004	Cds1
1369648_at	0.0342215	0.0342215	2.74	-3.4539	0.479624	0.479624	Calcrl
1388722_at	0.0342652	0.0342652	2.74	-3.4552	0.593101	0.593101	Dnajb1
1389409_at	0.0342741	0.0342741	2.74	-3.4554	2.06879	2.06879	Tes
1377073_at	0.0342783	0.0342783	-2.74	-3.4555	0.463109	-0.463109	LOC100911193
1370906_at	0.034325	0.034325	-2.74	-3.4568	0.450238	-0.450238	Bckdhb
1370309_a_at	0.0343719	0.0343719	2.74	-3.4581	0.450083	0.450083	Hnrnpab
1390519_at	0.0343813	0.0343813	2.74	-3.4584	1.27206	1.27206	Gltscr1
1370373_at	0.0343827	0.0343827	-2.74	-3.4584	1.05171	-1.05171	Rasd2
1388518_at	0.0344467	0.0344467	-2.74	-3.4602	0.544855	-0.544855	Fbxw5
1398785_at	0.0344473	0.0344473	2.74	-3.4602	0.475894	0.475894	Men1
1371189_x_at	0.0344609	0.0344609	2.74	-3.4606		0.399014	LOC102556682///LOC100359969///Rpsa
1372475_at	0.0345289	0.0345289	-2.73	-3.4625	0.442552	-0.442552	Pink1
1370509_at	0.0345396	0.0345396	-2.73	-3.4628	0.520484	-0.520484	Pdp2
1374668_at	0.0345864	0.0345864	2.73	-3.464	1.11936	1.11936	Sf3a1
1368167_at	0.0345931	0.0345931	2.73	-3.4642	0.619636	0.619636	Ctse
1398806_at	0.0346256	0.0346256	2.73	-3.4651	0.413198	0.413198	Pitpna
1368519_at	0.0346505	0.0346505	2.73	-3.4658	2.4712	2.4712	Serpine1
1374126_at	0.0347632	0.0347632	2.73	-3.4689	0.562527	0.562527	Gpr137b
1373379_at	0.034787	0.034787	2.73	-3.4696	0.440336	0.440336	Irak1
1394155_at	0.0347896	0.0347896	-2.73	-3.4696	0.634172	-0.634172	Rbm7
1390355_at	0.0348169	0.0348169	-2.73	-3.4704	0.829813	-0.829813	Ryr1
1388128_at	0.0348466	0.0348466	2.73	-3.4712		0.535775	LOC100910079///Actr3b///Actr3
1371056_at	0.0348676	0.0348676	2.73	-3.4718	1.41601	1.41601	Neo1
1372939_at	0.0349576	0.0349576	2.73	-3.4742	0.471685	0.471685	Nudcd2
1374255_at	0.0349996	0.0349996	2.72	-3.4754	0.516757	0.516757	Farsa
1374225_at	0.0350021	0.0350021	-2.72	-3.4754	0.577623	-0.577623	Cep128
1371576_at	0.0350224	0.0350224	-2.72	-3.476	0.494645	-0.494645	Mrps36
1383263_at	0.0350549	0.0350549	-2.72	-3.4769		-0.519196	LOC100910855///Ogn
1375382_at	0.0350827	0.0350827	2.72	-3.4776	1.05733	1.05733	Mdc1
1368990_at	0.0351162	0.0351162	2.72	-3.4785	0.54492	0.54492	Cyp1b1
1370651_a_at	0.0351895	0.0351895	-2.72	-3.4805	0.505768	-0.505768	Inppl1
1383251_at	0.0351896	0.0351896	2.72	-3.4805	0.560583	0.560583	Parp2
1371843_at	0.0352789	0.0352789	2.72	-3.4829	0.400393	0.400393	Yipf5
1368338_at	0.0353297	0.0353297	2.72	-3.4843	1.50426	1.50426	Cd52
1369020_at	0.035348	0.035348	-2.72	-3.4848	0.864007	-0.864007	Slc5a5
1388740_at	0.0354879	0.0354879	2.71	-3.4886	0.952132	0.952132	Fermt3
1368196_at	0.0355684	0.0355684	-2.71	-3.4907	2.08155	-2.08155	Clps
1369456_at	0.0356157	0.0356157	2.71	-3.492	0.665445	0.665445	Htr2b
1376709_at	0.0356216	0.0356216	2.71	-3.4921	0.974401	0.974401	Slc39a8
1386976_at	0.035653	0.035653	2.71	-3.493	0.7626	0.7626	Cd82
1377353_a_at	0.0356564	0.0356564	2.71	-3.4931	0.785835	0.785835	Tnfsf13
1389766_at	0.0358172	0.0358172	-2.71	-3.4974	0.629011	-0.629011	RGD1309036
1388600_at	0.0358425	0.0358425	2.71	-3.498	0.432306	0.432306	Paqr8
1390522_at	0.0358516	0.0358516	-2.71	-3.4983	0.513306	-0.513306	Kdm2a
1371044_at	0.0358737	0.0358737	2.71	-3.4989	0.73559	0.73559	Pde7a
1390118_at	0.0358827	0.0358827	2.71	-3.4991	0.437838	0.437838	Clp1
1390306_at	0.0359445	0.0359445	2.7	-3.5007	0.679288	0.679288	Flrt2
1370875_at	0.0360046	0.0360046	2.7	-3.5023	0.383742	0.383742	Ezr
1367885_at	0.0360092	0.0360092	-2.7	-3.5024	0.48219	-0.48219	Pxmp2
1377902_a_at	0.0360462	0.0360462	-2.7	-3.5034	0.737762	-0.737762	Rad52
1370051_at	0.0360571	0.0360571	2.7	-3.5037	1.15099	1.15099	Tgm1
1389148_at	0.0360792	0.0360792	-2.7	-3.5043	0.47641	-0.47641	Apool
1374177_at	0.0361069	0.0361069	2.7	-3.505	0.570172	0.570172	Taf13
1376803_at	0.0361403	0.0361403	2.7	-3.5059	0.627624	0.627624	Rgs3
1368458_at	0.0361586	0.0361586	-2.7	-3.5064	0.547821	-0.547821	Cyp7a1
1387534_at	0.0361834	0.0361834	-2.7	-3.507		-2.04601	Pde11a///Cyct
1372135_at	0.036222	0.036222	-2.7	-3.5081	0.525721	-0.525721	Twf2
1390542_at	0.0362668	0.0362668	2.7	-3.5092	0.917977	0.917977	Rad51c
1376445_at	0.0362769	0.0362769	2.7	-3.5095	2.18377	2.18377	Il17b
1388788_at	0.0362966	0.0362966	-2.7	-3.51	0.428235	-0.428235	Gcdh
1370964_at	0.0363242	0.0363242	2.7	-3.5107	0.714906	0.714906	Ass1
1370285_at	0.0363293	0.0363293	-2.7	-3.5109		-0.467611	LOC100912282///Calcoco1
1371605_at	0.0363303	0.0363303	-2.7	-3.5109		-0.390414	LOC100910710///Ndufa12
1373108_at	0.0363324	0.0363324	-2.7	-3.511	0.609649	-0.609649	Ppp1r3c
1371950_at	0.0363337	0.0363337	2.7	-3.511	0.40497	0.40497	Pdzd11
1377423_at	0.0363515	0.0363515	-2.7	-3.5115	0.608836	-0.608836	Arhgef37
1374615_at	0.036382	0.036382	2.69	-3.5123	0.56115	0.56115	Ankrd44
1368367_at	0.0363877	0.0363877	-2.69	-3.5124	1.55717	-1.55717	Cuzd1
1368035_a_at	0.0363978	0.0363978	2.69	-3.5127	0.530708	0.530708	Ptprf
1372870_at	0.0364358	0.0364358	2.69	-3.5137	0.726684	0.726684	Kdelr3
1387357_at	0.0364413	0.0364413	-2.69	-3.5138	0.56102	-0.56102	Tmlhe
1370814_at	0.0365734	0.0365734	-2.69	-3.5172	0.385343	-0.385343	Dhrs4
1390043_at	0.0365906	0.0365906	-2.69	-3.5177	0.980517	-0.980517	Smarcc2
1372982_at	0.0365913	0.0365913	-2.69	-3.5177	0.392797	-0.392797	Ppp3r1
1378392_at	0.0365965	0.0365965	-2.69	-3.5178	0.564911	-0.564911	Dnaja3
1368716_at	0.0365999	0.0365999	-2.69	-3.5179	0.487257	-0.487257	Ppp1r14c
1371073_at	0.0366065	0.0366065	2.69	-3.5181	0.643392	0.643392	B4galt1
1374086_at	0.0366147	0.0366147	-2.69	-3.5183	0.473715	-0.473715	Arhgap21
1375083_at	0.0366259	0.0366259	2.69	-3.5186	1.2054	1.2054	LOC685849
1369772_at	0.0367154	0.0367154	2.69	-3.5209	0.859513	0.859513	Slc6a9
1376368_at	0.0367375	0.0367375	2.69	-3.5215	0.407118	0.407118	Cuedc2
1373090_at	0.0367432	0.0367432	2.69	-3.5217	0.659933	0.659933	Ssr1
1368316_at	0.0368022	0.0368022	-2.69	-3.5232	0.715263	-0.715263	Aqp8
1389760_at	0.0368214	0.0368214	2.69	-3.5237	0.500354	0.500354	Pcgf6
1387398_at	0.0368298	0.0368298	-2.69	-3.5239	0.483396	-0.483396	Pkia
1388565_at	0.0368365	0.0368365	2.69	-3.5241	0.593842	0.593842	Spg21
1374387_at	0.036884	0.036884	-2.68	-3.5253	0.406886	-0.406886	Arl6ip5
1371615_at	0.0368973	0.0368973	2.68	-3.5256	0.571734	0.571734	Dgat2
1372123_at	0.0368974	0.0368974	-2.68	-3.5256	0.499517	-0.499517	Sdhb
1382690_at	0.0369	0.0369	2.68	-3.5257	0.580975	0.580975	Cgm4
1398336_at	0.0369147	0.0369147	2.68	-3.5261	1.63077	1.63077	Rnf25
1371366_at	0.0369823	0.0369823	2.68	-3.5278	0.527508	0.527508	Arhgdia
1387335_s_at	0.0370935	0.0370935	2.68	-3.5307	1.5538	1.5538	Gbgt1
1388497_at	0.0370961	0.0370961	-2.68	-3.5308	0.569662	-0.569662	Acot13
1370738_a_at	0.0371248	0.0371248	-2.68	-3.5315	0.616713	-0.616713	Trdn
1388667_at	0.0371635	0.0371635	2.68	-3.5325	1.11378	1.11378	Man2a1
1374078_at	0.0371769	0.0371769	2.68	-3.5328	0.574225	0.574225	Phf21a
1390766_at	0.0371912	0.0371912	-2.68	-3.5332	1.00779	-1.00779	Tuba8
1372808_at	0.0372055	0.0372055	2.68	-3.5336		1.15105	Mthfd2///RGD1564040
1387879_a_at	0.0372575	0.0372575	-2.68	-3.5349	0.415902	-0.415902	Celf2
1369924_at	0.0373905	0.0373905	-2.67	-3.5383	1.01958	-1.01958	Sncb
1368430_at	0.0373981	0.0373981	2.67	-3.5385	0.838663	0.838663	Lgmn
1369401_at	0.0374276	0.0374276	-2.67	-3.5392	2.48142	-2.48142	Slco1a6
1369938_at	0.0374324	0.0374324	-2.67	-3.5394	0.61398	-0.61398	Pank4
1372636_at	0.0374445	0.0374445	-2.67	-3.5397	0.602906	-0.602906	Rab40c
1372133_at	0.0374661	0.0374661	-2.67	-3.5402	0.385623	-0.385623	Rras2
1373484_at	0.0374974	0.0374974	2.67	-3.541	0.421749	0.421749	Klhl13
1372043_at	0.0375162	0.0375162	2.67	-3.5415	0.762614	0.762614	Mrto4
1373954_at	0.0375351	0.0375351	2.67	-3.542	0.687017	0.687017	Suds3
1376075_at	0.0375828	0.0375828	2.67	-3.5432	0.581576	0.581576	Psen1
1369584_at	0.0376291	0.0376291	2.67	-3.5443	0.660779	0.660779	Socs3
1376017_at	0.0376948	0.0376948	-2.67	-3.546	1.70626	-1.70626	Wdr17
1390473_at	0.0377128	0.0377128	-2.67	-3.5465	0.742154	-0.742154	Kcng2
1387135_at	0.0377167	0.0377167	2.67	-3.5466	0.75299	0.75299	Adam15
1371963_at	0.0377435	0.0377435	-2.67	-3.5472	0.560014	-0.560014	Pcca
1372750_at	0.0377672	0.0377672	2.67	-3.5478	0.818649	0.818649	Fst
1370904_at	0.0377735	0.0377735	2.67	-3.548		0.894202	LOC100909593///RT1-DMa
1373939_at	0.0377916	0.0377916	2.67	-3.5484	0.423355	0.423355	Nagk
1372159_at	0.0379066	0.0379066	-2.66	-3.5513	0.544173	-0.544173	Jph2
1376030_at	0.0379375	0.0379375	2.66	-3.5521	1.33641	1.33641	Acap1
1368435_at	0.037993	0.037993	-2.66	-3.5535	1.62776	-1.62776	Cyp8b1
1371913_at	0.038027	0.038027	2.66	-3.5544	0.940981	0.940981	Tgfbi
1375972_at	0.0380384	0.0380384	2.66	-3.5546	1.33746	1.33746	Fam57a
1387897_at	0.0380536	0.0380536	2.66	-3.555	0.592012	0.592012	Cnp
1367959_a_at	0.0380628	0.0380628	-2.66	-3.5552	0.428171	-0.428171	Scn1b
1390023_at	0.0380858	0.0380858	-2.66	-3.5558	0.410655	-0.410655	LOC680039
1375981_a_at	0.0381276	0.0381276	2.66	-3.5569		0.515284	RGD1565692///Suv39h1
1375374_at	0.0381387	0.0381387	2.66	-3.5571	0.487869	0.487869	LOC102555400
1389051_at	0.038139	0.038139	-2.66	-3.5572	0.490642	-0.490642	Rxrb
1386965_at	0.0381907	0.0381907	-2.66	-3.5584	0.437425	-0.437425	Lpl
1370162_at	0.0382436	0.0382436	2.66	-3.5598	0.445676	0.445676	Ppp4r1
1371780_at	0.0382549	0.0382549	2.66	-3.56	0.525159	0.525159	Kdelr2
1368358_a_at	0.0382572	0.0382572	-2.66	-3.5601	0.382544	-0.382544	Ptprr
1398982_at	0.0383123	0.0383123	-2.66	-3.5615	0.375006	-0.375006	Rab1b
1370654_at	0.0383577	0.0383577	2.65	-3.5626	1.32305	1.32305	Slc6a17
1370012_at	0.0383963	0.0383963	2.65	-3.5636	1.33279	1.33279	Ptgis
1389630_at	0.038473	0.038473	2.65	-3.5655	0.657307	0.657307	LOC100912310
1374099_at	0.0384955	0.0384955	-2.65	-3.566	0.512521	-0.512521	Nrap
1369559_a_at	0.0385132	0.0385132	2.65	-3.5664	0.439486	0.439486	Cd47
1377095_at	0.0385389	0.0385389	-2.65	-3.5671	1.31648	-1.31648	Rbfox3
1389367_at	0.0385625	0.0385625	-2.65	-3.5677	0.451801	-0.451801	Schip1
1389912_at	0.0385763	0.0385763	-2.65	-3.568	0.517352	-0.517352	Ensa
1374962_at	0.0386041	0.0386041	-2.65	-3.5687	0.394661	-0.394661	Rtn4ip1
1386931_at	0.0386061	0.0386061	-2.65	-3.5687	0.467632	-0.467632	Tnni3
1374818_at	0.038619	0.038619	2.65	-3.5691	1.54855	1.54855	Nxph3
1372536_at	0.0386307	0.0386307	-2.65	-3.5693	0.567258	-0.567258	Coq8a
1376350_at	0.0386468	0.0386468	-2.65	-3.5697	1.09652	-1.09652	Aff2
1370276_at	0.0387973	0.0387973	-2.65	-3.5734	0.496938	-0.496938	Atp5o
1369157_at	0.0388739	0.0388739	2.64	-3.5753	0.503716	0.503716	Pde3b
1371400_at	0.0389689	0.0389689	-2.64	-3.5776	0.553106	-0.553106	Thrsp
1372818_at	0.0389757	0.0389757	2.64	-3.5778	0.571473	0.571473	Colec12
1371321_at	0.0389965	0.0389965	-2.64	-3.5783		-0.386008	LOC688869///LOC681754
1379747_at	0.0389981	0.0389981	2.64	-3.5784	0.877582	0.877582	Prss35
1369877_at	0.0391514	0.0391514	2.64	-3.5821	1.56111	1.56111	Cd8a
1371367_at	0.0392745	0.0392745	2.64	-3.5851	0.453173	0.453173	Tardbp
1375654_at	0.0393127	0.0393127	2.64	-3.586	1.32178	1.32178	Ckap4
1370859_at	0.0393359	0.0393359	2.64	-3.5866	0.412968	0.412968	Pdia6
1382841_at	0.0393601	0.0393601	2.64	-3.5871	0.593959	0.593959	Tssc4
1387829_at	0.03939	0.03939	-2.63	-3.5879	0.887758	-0.887758	Slc24a1
1371934_at	0.0393976	0.0393976	-2.63	-3.5881	0.50967	-0.50967	Usp21
1373142_at	0.0394087	0.0394087	-2.63	-3.5883	0.389858	-0.389858	Ghitm
1387814_at	0.0394439	0.0394439	-2.63	-3.5892	0.558103	-0.558103	Cav3
1371578_at	0.0394577	0.0394577	-2.63	-3.5895	0.45454	-0.45454	Prkaca
1368027_at	0.0394838	0.0394838	2.63	-3.5901	0.416714	0.416714	Tbxas1
1373581_at	0.0395071	0.0395071	-2.63	-3.5907	0.442449	-0.442449	Arhgap44
1367666_at	0.0395969	0.0395969	2.63	-3.5929	0.388124	0.388124	Hnrnph1
1377142_at	0.0396454	0.0396454	-2.63	-3.594	1.27812	-1.27812	Trpm3
1373393_at	0.0397561	0.0397561	2.63	-3.5967	0.519002	0.519002	Ext1
1382446_at	0.0398247	0.0398247	-2.63	-3.5983	0.507851	-0.507851	Atp5s
1387139_at	0.039827	0.039827	-2.63	-3.5984	1.2418	-1.2418	Hao2
1375216_at	0.0398679	0.0398679	2.63	-3.5993	1.93109	1.93109	Nectin2
1387730_at	0.0398836	0.0398836	2.63	-3.5997	0.874096	0.874096	Pax8
1373986_at	0.0398855	0.0398855	2.63	-3.5998	0.576554	0.576554	Fnip2
1373868_at	0.0398912	0.0398912	2.63	-3.5999	0.634103	0.634103	Bclaf1
1373792_at	0.0399052	0.0399052	-2.63	-3.6002	0.388674	-0.388674	Actr1b
1375518_at	0.0399056	0.0399056	-2.63	-3.6002	0.541698	-0.541698	Ttn
1371510_at	0.0399232	0.0399232	-2.62	-3.6007	0.394135	-0.394135	Hcfc1r1
1376801_at	0.0399232	0.0399232	2.62	-3.6007	1.83439	1.83439	RGD1564450
1372303_at	0.0399623	0.0399623	2.62	-3.6016	0.729007	0.729007	Fam49b
1370865_at	0.0401496	0.0401496	-2.62	-3.606	0.403158	-0.403158	Idh3g
1368450_at	0.0401839	0.0401839	2.62	-3.6069	0.487111	0.487111	Myo5a
1388139_at	0.0402529	0.0402529	-2.62	-3.6085	1.1073	-1.1073	Myh2
1367744_at	0.0403798	0.0403798	2.62	-3.6115	0.470647	0.470647	Maged2
1367667_at	0.0404138	0.0404138	2.62	-3.6123	0.418868	0.418868	Fdps
1371360_at	0.0404543	0.0404543	2.61	-3.6132	0.671237	0.671237	Ndrg1
1379243_at	0.0404636	0.0404636	-2.61	-3.6135	0.424659	-0.424659	Ndufa6
1370973_at	0.040514	0.040514	-2.61	-3.6146	0.62029	-0.62029	Scn7a
1372215_at	0.0405471	0.0405471	-2.61	-3.6154	0.578379	-0.578379	Mrps11
1371461_at	0.0405478	0.0405478	-2.61	-3.6154	0.399047	-0.399047	Mtfr1l
1374456_at	0.0405703	0.0405703	2.61	-3.616	0.483884	0.483884	Tmx3
1388398_at	0.0405715	0.0405715	2.61	-3.616	0.507541	0.507541	Rps4y2
1387671_at	0.0406313	0.0406313	-2.61	-3.6174	0.67021	-0.67021	Sctr
1371421_at	0.0406389	0.0406389	-2.61	-3.6176	0.416959	-0.416959	Oxct1
1374017_at	0.040677	0.040677	-2.61	-3.6185	0.5002	-0.5002	Trim72
1371517_at	0.0407059	0.0407059	2.61	-3.6191	0.706969	0.706969	Grb10
1368878_at	0.0407221	0.0407221	2.61	-3.6195	0.706656	0.706656	Idi1
1372652_at	0.0407881	0.0407881	-2.61	-3.621	0.382979	-0.382979	Foxo4
1376718_at	0.0408236	0.0408236	-2.61	-3.6219	0.379765	-0.379765	Mblac1
1373856_at	0.0408333	0.0408333	-2.61	-3.6221	0.645827	-0.645827	Rd3l
1374453_at	0.0409236	0.0409236	2.61	-3.6242	0.43429	0.43429	Plxna1
1373982_at	0.0409769	0.0409769	-2.61	-3.6254	0.497634	-0.497634	Tefm
1374984_at	0.0410031	0.0410031	-2.6	-3.6261	1.32726	-1.32726	Epb4.1l5
1371238_at	0.0410397	0.0410397	-2.6	-3.6269	1.34901	-1.34901	Grm1
1389263_at	0.0410971	0.0410971	2.6	-3.6282	0.645141	0.645141	Rai14
1375637_at	0.0411045	0.0411045	2.6	-3.6284	0.365619	0.365619	Smim14
1375114_at	0.0411584	0.0411584	2.6	-3.6296	0.964329	0.964329	Purb
1371416_at	0.0412016	0.0412016	-2.6	-3.6306		-0.445335	LOC100911329///Ndufv1
1370481_at	0.0412243	0.0412243	2.6	-3.6312	1.73747	1.73747	Scnn1g
1389520_at	0.0412283	0.0412283	2.6	-3.6313	0.449772	0.449772	Wdr1
1388061_a_at	0.0412321	0.0412321	-2.6	-3.6313	0.728378	-0.728378	Epha7
1388433_at	0.0412337	0.0412337	-2.6	-3.6314	1.81597	-1.81597	Krt19
1372333_at	0.041359	0.041359	2.6	-3.6343	0.396472	0.396472	Snrpe
1375663_at	0.0414001	0.0414001	2.6	-3.6352	0.46798	0.46798	Ube2f
1367476_at	0.0414328	0.0414328	-2.6	-3.636	0.370792	-0.370792	Srp14
1377806_at	0.0414437	0.0414437	-2.6	-3.6362	0.499137	-0.499137	Vezf1
1373252_at	0.0414488	0.0414488	2.6	-3.6363		0.544749	LOC100912815///Fmnl3
1369338_at	0.0414691	0.0414691	-2.6	-3.6368	0.79921	-0.79921	Robo1
1373621_at	0.0415119	0.0415119	2.6	-3.6378	0.437114	0.437114	Gmpr2
1375517_at	0.0415198	0.0415198	-2.6	-3.638	0.415094	-0.415094	Tp53inp2
1388364_at	0.0415686	0.0415686	-2.59	-3.6391	0.410314	-0.410314	Ndufs3
1379685_at	0.041578	0.041578	-2.59	-3.6393	0.430521	-0.430521	Scaf4
1373527_at	0.0416199	0.0416199	2.59	-3.6402	0.407714	0.407714	Eml3
1374389_at	0.0416542	0.0416542	2.59	-3.641	0.694859	0.694859	Gucy1b3
1371755_at	0.0417053	0.0417053	-2.59	-3.6422	0.34235	-0.34235	RGD1566359
1389686_at	0.0417148	0.0417148	2.59	-3.6424	0.370291	0.370291	Prkx
1371325_at	0.0417197	0.0417197	2.59	-3.6425	0.590777	0.590777	Ctsa
1392683_at	0.0417238	0.0417238	-2.59	-3.6426	0.626184	-0.626184	Tmem71
1371382_at	0.0417397	0.0417397	2.59	-3.643	0.615364	0.615364	Flna
1376850_a_at	0.0417512	0.0417512	2.59	-3.6432	0.570527	0.570527	Ccl27
1371302_at	0.0419243	0.0419243	-2.59	-3.6472	0.426657	-0.426657	Serf2
1373024_at	0.041945	0.041945	2.59	-3.6476	0.58898	0.58898	Ap3s1
1377018_at	0.0419663	0.0419663	-2.59	-3.6481	1.94099	-1.94099	Pamr1
1390566_a_at	0.0419949	0.0419949	-2.59	-3.6488	1.1686	-1.1686	Ckmt1b
1375628_at	0.0421015	0.0421015	-2.58	-3.6512	0.51032	-0.51032	Ndufb8
1376603_at	0.0421782	0.0421782	-2.58	-3.6529	0.557281	-0.557281	Dcaf4
1377065_at	0.0422049	0.0422049	-2.58	-3.6535	0.687153	-0.687153	LOC102556889
1373971_at	0.0423527	0.0423527	2.58	-3.6568	1.41365	1.41365	Lpcat4
1376921_at	0.0424138	0.0424138	-2.58	-3.6582	0.6078	-0.6078	Foxred1
1377016_at	0.0424367	0.0424367	2.58	-3.6587	0.840777	0.840777	Creld2
1370623_at	0.0424753	0.0424753	2.58	-3.6596	0.778872	0.778872	Fgl2
1368908_at	0.0425934	0.0425934	2.58	-3.6622	0.730205	0.730205	Anxa4
1370272_x_at	0.0426266	0.0426266	-2.58	-3.663	0.907758	-0.907758	Grpca
1388786_at	0.0427507	0.0427507	2.57	-3.6657	0.48867	0.48867	Synpo
1389705_at	0.0428587	0.0428587	2.57	-3.6681	0.506657	0.506657	Slc50a1
1388629_at	0.0428607	0.0428607	2.57	-3.6682	0.46751	0.46751	Impdh2
1384547_at	0.0429445	0.0429445	-2.57	-3.67	0.728696	-0.728696	Bpifb4
1372625_at	0.0429485	0.0429485	2.57	-3.6701	0.518422	0.518422	Ppp1r12c
1388130_at	0.0429823	0.0429823	2.57	-3.6709	0.44358	0.44358	Zyx
1373312_at	0.0430244	0.0430244	-2.57	-3.6718	0.575418	-0.575418	Pnkd
1370228_at	0.0430475	0.0430475	2.57	-3.6723		0.508257	Srprb///Tf
1374503_at	0.0430738	0.0430738	2.57	-3.6729	0.453159	0.453159	Pbx3
1373119_at	0.043122	0.043122	2.57	-3.674	1.69375	1.69375	Kctd3
1375332_at	0.0431641	0.0431641	-2.57	-3.6749	0.662274	-0.662274	P4ha2
1374698_at	0.0432417	0.0432417	-2.56	-3.6766	0.583255	-0.583255	LOC687508
1384237_at	0.0432754	0.0432754	-2.56	-3.6773	1.61151	-1.61151	Pex10
1367616_at	0.0433052	0.0433052	-2.56	-3.678	0.534096	-0.534096	Nppb
1372812_at	0.0433151	0.0433151	2.56	-3.6782	0.486599	0.486599	Secisbp2l
1388814_at	0.0433472	0.0433472	2.56	-3.6789		0.493564	Ddx19b///Ddx19a
1386924_at	0.0434322	0.0434322	-2.56	-3.6808	0.717815	-0.717815	Ube2b
1386861_at	0.043516	0.043516	2.56	-3.6826	0.487242	0.487242	H2afz
1371294_at	0.0435249	0.0435249	2.56	-3.6828	0.538463	0.538463	Hbz
1388620_at	0.043541	0.043541	-2.56	-3.6831		-0.38697	Tada3///Tada3lb
1371345_at	0.0436645	0.0436645	2.56	-3.6858	0.378842	0.378842	Mbd3
1389326_at	0.0436727	0.0436727	2.56	-3.686	0.701351	0.701351	Rfc3
1373507_at	0.0436941	0.0436941	-2.56	-3.6865	0.482115	-0.482115	Acbd5
1367635_at	0.0438141	0.0438141	2.55	-3.6891	0.401482	0.401482	P4hb
1367757_at	0.0438419	0.0438419	-2.55	-3.6897		-0.365166	LOC100365711///Cox6c
1389642_at	0.0438633	0.0438633	2.55	-3.6902	0.568229	0.568229	Tbc1d13
1372663_at	0.0439046	0.0439046	-2.55	-3.691	0.569978	-0.569978	Ptdss2
1386893_at	0.0439096	0.0439096	2.55	-3.6912	0.580512	0.580512	Grn
1368707_at	0.0439503	0.0439503	-2.55	-3.692	0.581042	-0.581042	Itih4
1375708_at	0.0439674	0.0439674	-2.55	-3.6924	0.954267	-0.954267	Col27a1
1373721_at	0.0440844	0.0440844	-2.55	-3.6949	0.419037	-0.419037	Hars2
1367932_at	0.0440916	0.0440916	2.55	-3.6951	0.505232	0.505232	Hmgcs1
1367588_a_at	0.0441682	0.0441682	2.55	-3.6967	0.477368	0.477368	Rpl13a
1368355_at	0.0441697	0.0441697	-2.55	-3.6968	0.457847	-0.457847	Myo5b
1386914_at	0.0441758	0.0441758	-2.55	-3.6969	0.476939	-0.476939	Gmpr
1372376_at	0.0442678	0.0442678	-2.55	-3.6989	0.413809	-0.413809	Setd2
1371249_at	0.044306	0.044306	2.55	-3.6997	0.517065	0.517065	Xbp1
1375020_at	0.0443397	0.0443397	2.55	-3.7004	0.513918	0.513918	Rin3
1386928_at	0.0443461	0.0443461	-2.55	-3.7006	0.378903	-0.378903	Bcat2
1367780_at	0.0443463	0.0443463	2.55	-3.7006	0.785384	0.785384	Pttg1
1376325_at	0.0443621	0.0443621	-2.55	-3.7009	0.364535	-0.364535	Nfrkb
1373998_at	0.0444378	0.0444378	2.54	-3.7025	0.434445	0.434445	Specc1
1370010_at	0.0445686	0.0445686	2.54	-3.7053	0.569047	0.569047	Lamp2
1374638_at	0.0445687	0.0445687	-2.54	-3.7053	0.342992	-0.342992	Pex13
1370987_at	0.0447311	0.0447311	2.54	-3.7088	0.40096	0.40096	Spn
1389430_at	0.0447322	0.0447322	2.54	-3.7088	1.59432	1.59432	Hsd17b7
1371680_at	0.0447574	0.0447574	-2.54	-3.7093	0.601254	-0.601254	Gabarapl1
1369332_a_at	0.0447751	0.0447751	-2.54	-3.7097	0.485921	-0.485921	Rims1
1387846_at	0.0447824	0.0447824	2.54	-3.7099	1.19692	1.19692	Cacna1f
1387031_at	0.0448193	0.0448193	2.54	-3.7106	0.525758	0.525758	Erp29
1372421_at	0.0448377	0.0448377	2.54	-3.711	0.554666	0.554666	Aga
1388993_at	0.0448432	0.0448432	-2.54	-3.7111	0.422938	-0.422938	Rnf34
1371790_at	0.0448757	0.0448757	-2.54	-3.7118	0.42628	-0.42628	Mrpl45
1374039_at	0.0448811	0.0448811	-2.54	-3.7119	0.449519	-0.449519	Car14
1389287_at	0.0449154	0.0449154	-2.54	-3.7127	0.380143	-0.380143	Tead1
1368003_at	0.0449671	0.0449671	2.54	-3.7138	0.802459	0.802459	Aldh1a2
1375211_at	0.0450249	0.0450249	2.53	-3.715	0.638789	0.638789	Rnaset2
1377835_at	0.0450347	0.0450347	2.53	-3.7152	0.833915	0.833915	Dock8
1387577_at	0.0450489	0.0450489	-2.53	-3.7155	0.89308	-0.89308	Neurod2
1375129_at	0.0451009	0.0451009	-2.53	-3.7166	0.671086	-0.671086	Fgfr2
1389667_at	0.0451517	0.0451517	-2.53	-3.7177	0.380232	-0.380232	LOC683897
1372848_at	0.0451633	0.0451633	-2.53	-3.7179	0.630473	-0.630473	Tmem179
1368079_at	0.0451654	0.0451654	-2.53	-3.7179	0.363229	-0.363229	Pdk1
1367599_at	0.0452761	0.0452761	-2.53	-3.7203		-0.413407	LOC689961///Atp5g1
1371370_a_at	0.045302	0.045302	-2.53	-3.7208	1.84876	-1.84876	Svs6
1383054_at	0.0453305	0.0453305	-2.53	-3.7214	0.372291	-0.372291	Zfp91
1371549_at	0.0453637	0.0453637	-2.53	-3.7221	0.411179	-0.411179	Dcaf11
1373804_at	0.0453692	0.0453692	2.53	-3.7222	0.45937	0.45937	Foxp1
1371170_a_at	0.0453881	0.0453881	-2.53	-3.7226	0.80802	-0.80802	Il1a
1372603_at	0.0454222	0.0454222	-2.53	-3.7233	0.46036	-0.46036	Pacsin3
1387861_at	0.0454273	0.0454273	-2.53	-3.7234	0.405345	-0.405345	Aes
1373915_at	0.0454307	0.0454307	-2.53	-3.7235	0.439688	-0.439688	Dmpk
1371594_at	0.0454677	0.0454677	-2.53	-3.7243	0.368952	-0.368952	Fis1
1367851_at	0.0455611	0.0455611	-2.53	-3.7262	0.817815	-0.817815	Ptgds
1375735_at	0.0455842	0.0455842	-2.53	-3.7267	0.728756	-0.728756	Cacng2
1389672_at	0.0456048	0.0456048	2.52	-3.7271		0.423446	LOC100910056///Uhrf1bp1l
1371595_at	0.0456474	0.0456474	2.52	-3.728	0.445497	0.445497	LOC100912446
1387303_at	0.0456958	0.0456958	2.52	-3.729	1.37282	1.37282	Slc22a2
1376234_at	0.0456993	0.0456993	-2.52	-3.7291	0.454192	-0.454192	Snx18
1368967_at	0.0457274	0.0457274	2.52	-3.7297	0.399348	0.399348	Eif2b3
1389063_at	0.0457315	0.0457315	2.52	-3.7298	0.605326	0.605326	Xpo6
1373469_at	0.0457353	0.0457353	2.52	-3.7298	0.354652	0.354652	Hacd3
1369234_at	0.0457367	0.0457367	-2.52	-3.7299	0.411728	-0.411728	Slc20a2
1382105_at	0.0457554	0.0457554	-2.52	-3.7303	0.612709	-0.612709	Gnb5
1370226_at	0.0458718	0.0458718	2.52	-3.7327	0.559203	0.559203	Cstb
1376971_at	0.0458851	0.0458851	-2.52	-3.733	0.435285	-0.435285	Atg10
1371561_at	0.045983	0.045983	-2.52	-3.735	0.460855	-0.460855	G6pc3
1382632_at	0.0459991	0.0459991	-2.52	-3.7353	1.98669	-1.98669	Robo2
1387862_at	0.0460019	0.0460019	2.52	-3.7354	0.494853	0.494853	Ywhaq
1368315_at	0.0460078	0.0460078	-2.52	-3.7355	0.590929	-0.590929	Entpd6
1398862_at	0.0460376	0.0460376	-2.52	-3.7361	0.448547	-0.448547	Atp2a2
1368517_at	0.046105	0.046105	2.52	-3.7375	1.39958	1.39958	Ssbp3
1371892_at	0.0461352	0.0461352	-2.52	-3.7381	0.538229	-0.538229	Atpaf2
1390205_at	0.0461936	0.0461936	2.52	-3.7393	0.353241	0.353241	Zswim6
1367605_at	0.0461967	0.0461967	2.52	-3.7394	0.553368	0.553368	Pfn1
1387204_at	0.0462309	0.0462309	2.51	-3.7401	1.13907	1.13907	Negr1
1371051_at	0.0462851	0.0462851	-2.51	-3.7412	0.371261	-0.371261	Polr2m
1386966_a_at	0.0462882	0.0462882	-2.51	-3.7413	0.490876	-0.490876	Rbck1
1376059_at	0.0463025	0.0463025	2.51	-3.7416	0.337848	0.337848	Gigyf2
1387877_at	0.0463171	0.0463171	-2.51	-3.7418	1.35451	-1.35451	Ftcd
1371770_at	0.0463683	0.0463683	-2.51	-3.7429	0.363459	-0.363459	Pfdn6
1381464_at	0.0463926	0.0463926	-2.51	-3.7434	0.942443	-0.942443	Tbx3
1372698_at	0.0464166	0.0464166	2.51	-3.7439	0.35142	0.35142	Samd1
1367799_at	0.0464377	0.0464377	-2.51	-3.7443	0.44906	-0.44906	Eef1a2
1370011_at	0.0464772	0.0464772	-2.51	-3.7451	0.523392	-0.523392	Ak1
1368164_at	0.0465062	0.0465062	2.51	-3.7457	0.612423	0.612423	Blvra
1370112_at	0.046526	0.046526	2.51	-3.7461	0.480122	0.480122	Pten
1371380_at	0.0465277	0.0465277	-2.51	-3.7462	0.365811	-0.365811	Pdha1
1370934_at	0.0466484	0.0466484	2.51	-3.7486	0.460892	0.460892	Nup153
1369262_at	0.0466534	0.0466534	2.51	-3.7487	1.52327	1.52327	Casp8
1370378_at	0.0466731	0.0466731	-2.51	-3.7491	0.43404	-0.43404	Atp5a1
1387627_at	0.0466847	0.0466847	2.51	-3.7494	0.574457	0.574457	Cd86
1387486_at	0.046687	0.046687	-2.51	-3.7494	1.03422	-1.03422	Trim9
1370303_at	0.0466969	0.0466969	2.51	-3.7496	0.510441	0.510441	Slc35a4
1371243_at	0.0467322	0.0467322	-2.51	-3.7503	1.82966	-1.82966	Grm8
1373715_at	0.0467648	0.0467648	2.51	-3.751	0.682266	0.682266	Lrwd1
1375127_at	0.0468266	0.0468266	-2.51	-3.7522	0.373904	-0.373904	Cox5a
1369139_at	0.0468894	0.0468894	-2.5	-3.7535	0.821426	-0.821426	Pdc
1389453_at	0.046902	0.046902	-2.5	-3.7538	0.442684	-0.442684	Rdm1
1389125_at	0.0469107	0.0469107	-2.5	-3.7539	0.61965	-0.61965	Mrpl1
1372762_at	0.0469163	0.0469163	-2.5	-3.7541	0.545624	-0.545624	Hddc3
1370429_at	0.0469821	0.0469821	2.5	-3.7554		0.571097	RT1-A///RT1-EC2
1388112_at	0.0470128	0.0470128	-2.5	-3.756	0.419388	-0.419388	Slc25a4
1394213_at	0.0470213	0.0470213	2.5	-3.7562	0.433339	0.433339	Ncbp3
1369458_at	0.0471239	0.0471239	2.5	-3.7582	1.31025	1.31025	Gab2
1370070_at	0.0471275	0.0471275	2.5	-3.7583	0.395498	0.395498	Synj1
1389732_at	0.0471281	0.0471281	2.5	-3.7583	0.57565	0.57565	Dram1
1370824_at	0.047134	0.047134	-2.5	-3.7584	1.05192	-1.05192	Slc38a3
1382345_at	0.0471421	0.0471421	2.5	-3.7586	0.418824	0.418824	Cdk17
1398788_at	0.0471511	0.0471511	2.5	-3.7588	0.466958	0.466958	Pdia3
1398946_at	0.0471542	0.0471542	-2.5	-3.7589	0.46502	-0.46502	Mrps16
1388732_at	0.0472214	0.0472214	-2.5	-3.7602	0.352279	-0.352279	Slc35f5
1371437_at	0.0472954	0.0472954	2.5	-3.7617	0.574323	0.574323	Sec13
1375349_at	0.0473278	0.0473278	-2.5	-3.7623	0.407367	-0.407367	Sorbs1
1392890_at	0.0473686	0.0473686	-2.5	-3.7632	1.68478	-1.68478	Pafah1b1
1387813_at	0.047411	0.047411	-2.5	-3.764	1.33362	-1.33362	Erbb2
1375456_at	0.0474414	0.0474414	-2.5	-3.7646	0.374142	-0.374142	Abhd17b
1390160_at	0.0474474	0.0474474	-2.5	-3.7647	0.576457	-0.576457	Lyrm9
1387542_at	0.0475578	0.0475578	-2.49	-3.7669	0.481189	-0.481189	Slc9a3
1388971_s_at	0.0475651	0.0475651	-2.49	-3.7671	1.94395	-1.94395	Krtdap
1375434_at	0.0475769	0.0475769	-2.49	-3.7673	1.44667	-1.44667	F8a1
1389563_at	0.0475977	0.0475977	-2.49	-3.7677	0.405028	-0.405028	Trappc10
1375649_at	0.0477419	0.0477419	2.49	-3.7706	1.54759	1.54759	Pou2f2
1373847_at	0.047818	0.047818	2.49	-3.7721	0.485767	0.485767	Tm4sf1
1398934_at	0.047822	0.047822	2.49	-3.7722	0.38263	0.38263	Tab2
1372297_at	0.0479067	0.0479067	-2.49	-3.7739	0.451954	-0.451954	Gsta4
1372246_at	0.0479773	0.0479773	2.49	-3.7753	0.621956	0.621956	Ostf1
1399112_at	0.0479882	0.0479882	2.49	-3.7755	1.74057	1.74057	Skiv2l
1389294_at	0.0479904	0.0479904	2.49	-3.7755	0.524527	0.524527	Cyfip1
1376513_a_at	0.048071	0.048071	2.49	-3.7771	0.699276	0.699276	LOC100910286
1373516_at	0.0480764	0.0480764	-2.49	-3.7772	0.50605	-0.50605	Rrp1b
1374441_at	0.0481227	0.0481227	-2.48	-3.7781	0.374801	-0.374801	Spryd4
1388108_at	0.0481351	0.0481351	2.48	-3.7784	1.24432	1.24432	Elovl6
1392530_at	0.0482103	0.0482103	-2.48	-3.7799	0.398249	-0.398249	Ndufc1
1373791_at	0.0482434	0.0482434	2.48	-3.7805	0.359388	0.359388	RGD1359127
1373188_at	0.048282	0.048282	-2.48	-3.7813	0.596752	-0.596752	Scn4b
1367961_at	0.0482929	0.0482929	-2.48	-3.7815	0.390447	-0.390447	Klk1b3
1367655_at	0.0483057	0.0483057	2.48	-3.7817		1.13421	LOC100911590///LOC100909821///LOC100364435///LOC100361620///LOC100361596///LOC100361392///LOC100359496///LOC100359493///Tmsb10
1387950_at	0.0483313	0.0483313	2.48	-3.7822	0.519995	0.519995	Nip7
1376185_at	0.0483482	0.0483482	2.48	-3.7826	1.02445	1.02445	Kifc1
1368470_at	0.0483995	0.0483995	2.48	-3.7836	0.557653	0.557653	Ggh
1374667_at	0.0484085	0.0484085	-2.48	-3.7838	0.605358	-0.605358	Fhod3
1387070_at	0.0484086	0.0484086	2.48	-3.7838	0.982619	0.982619	Tmpo
1387442_at	0.0484369	0.0484369	-2.48	-3.7843	0.952884	-0.952884	Egr4
1390268_at	0.0484743	0.0484743	2.48	-3.785	0.394943	0.394943	Rab35
1393280_at	0.048493	0.048493	2.48	-3.7854	0.618555	0.618555	Ly86
1371564_at	0.0484944	0.0484944	-2.48	-3.7854	0.350567	-0.350567	Atp6v1e1
1389362_at	0.0485836	0.0485836	-2.48	-3.7872	0.597783	-0.597783	Ptpn3
1370069_at	0.0486203	0.0486203	2.48	-3.7879	0.677084	0.677084	Slc12a5
1389378_at	0.0486738	0.0486738	2.48	-3.7889	0.768552	0.768552	Cdc42ep5
1390486_at	0.0487287	0.0487287	-2.48	-3.79	0.881786	-0.881786	Usp32
1376098_a_at	0.048735	0.048735	2.48	-3.7901	0.657502	0.657502	LOC102547700
1399128_at	0.0487579	0.0487579	2.48	-3.7906	1.80163	1.80163	Ubl5
1370490_at	0.0487802	0.0487802	2.47	-3.791	0.658554	0.658554	Pcdhb12
1375066_at	0.0488022	0.0488022	2.47	-3.7914	0.627061	0.627061	Ifitm10
1373823_at	0.0488658	0.0488658	2.47	-3.7927	0.962532	0.962532	Cks2
1388457_at	0.0488724	0.0488724	2.47	-3.7928	0.436732	0.436732	Mvb12a
1370918_a_at	0.0488976	0.0488976	-2.47	-3.7933	0.460407	-0.460407	Atp5c1
1389330_at	0.0489535	0.0489535	2.47	-3.7944	0.626323	0.626323	RGD1310127
1372074_at	0.0489785	0.0489785	-2.47	-3.7949	0.35048	-0.35048	Nudt3
1369968_at	0.0490295	0.0490295	2.47	-3.7958	0.989168	0.989168	Ptn
1389163_at	0.0490671	0.0490671	-2.47	-3.7966	0.426263	-0.426263	Trim32
1388392_at	0.0491181	0.0491181	2.47	-3.7976	0.3793	0.3793	Tax1bp3
1388220_at	0.0491415	0.0491415	-2.47	-3.798	0.556137	-0.556137	Pou2f3
1391996_a_at	0.0491492	0.0491492	-2.47	-3.7982	1.99508	-1.99508	LOC102550403
1390103_at	0.0491708	0.0491708	-2.47	-3.7986	0.416644	-0.416644	Phf2
1375788_at	0.0492107	0.0492107	2.47	-3.7993	0.671891	0.671891	Rpl7
1390027_at	0.0492494	0.0492494	-2.47	-3.8001	0.354764	-0.354764	Usp8
1375906_at	0.0492595	0.0492595	2.47	-3.8003	0.585588	0.585588	Fam104b
1373755_at	0.0492639	0.0492639	-2.47	-3.8004	0.477894	-0.477894	Lrrc39
1369960_at	0.049285	0.049285	-2.47	-3.8008	0.403696	-0.403696	Fxyd1
1372524_at	0.0492909	0.0492909	-2.47	-3.8009	0.435291	-0.435291	Lpin1
1368971_a_at	0.0493358	0.0493358	-2.47	-3.8018	0.591684	-0.591684	Synj2
1390171_at	0.0493471	0.0493471	-2.47	-3.802	0.470081	-0.470081	Fam76a
1374937_at	0.0493503	0.0493503	2.47	-3.802	0.458981	0.458981	RGD1565222
1388776_at	0.0495436	0.0495436	2.46	-3.8057	0.446739	0.446739	Shisa5
1386915_at	0.049557	0.049557	2.46	-3.806	0.467332	0.467332	Anp32b
1386040_at	0.0495595	0.0495595	-2.46	-3.806	0.369545	-0.369545	Klf2
1367724_a_at	0.0495964	0.0495964	2.46	-3.8067	0.629713	0.629713	Atp6v0e1
1368100_at	0.0496129	0.0496129	-2.46	-3.8071	0.415939	-0.415939	Pcyt2
1390685_at	0.0496134	0.0496134	-2.46	-3.8071	1.06903	-1.06903	LOC103693948
1367596_at	0.0496995	0.0496995	2.46	-3.8087		0.360782	LOC100361854///LOC100361756///LOC100360508///LOC688948///Rps26
1387590_at	0.049711	0.049711	-2.46	-3.8089	1.03758	-1.03758	Hrh4
1373381_at	0.0497222	0.0497222	2.46	-3.8092	0.391115	0.391115	Herc4
1387660_at	0.0497443	0.0497443	-2.46	-3.8096	1.37175	-1.37175	Iapp
1368274_at	0.0498054	0.0498054	2.46	-3.8107	0.355748	0.355748	Dbnl
1374155_at	0.0498278	0.0498278	2.46	-3.8112	0.757216	0.757216	LOC688452
1398962_at	0.0498735	0.0498735	2.46	-3.812	0.371929	0.371929	Abhd17a
1387805_at	0.0498742	0.0498742	-2.46	-3.812	0.428446	-0.428446	Bnip3
1377328_at	0.0499186	0.0499186	-2.46	-3.8129	0.392039	-0.392039	Mitf
1368212_at	0.0499361	0.0499361	2.46	-3.8132	0.398841	0.398841	Srsf11
1387263_at	0.0500428	0.0500428	-2.46	-3.8152		-1.00737	Pklr
1371817_at	0.050157	0.050157	2.45	-3.8174		1.33604	Isyna1
1388768_at	0.0501626	0.0501626	-2.45	-3.8175		-0.62831	Sgsm2
1375940_a_at	0.0501731	0.0501731	2.45	-3.8177		0.459882	Kctd17
1376074_at	0.0501906	0.0501906	-2.45	-3.818		-1.41091	Rab11fip4
1388972_at	0.0502077	0.0502077	-2.45	-3.8184		-1.41486	Rtn4r
1370946_at	0.0502931	0.0502931	-2.45	-3.82		-0.398754	Nf1x
1388906_at	0.0503203	0.0503203	2.45	-3.8205		0.450696	Tns3
1398879_at	0.0503631	0.0503631	2.45	-3.8213		0.331032	Saraf
1388528_at	0.0503904	0.0503904	2.45	-3.8218		0.763279	Fbl
1388792_at	0.0504532	0.0504532	2.45	-3.823		0.760786	Gadd45g
1389092_at	0.0504986	0.0504986	2.45	-3.8238		0.574063	Il2rg
1387908_at	0.0505326	0.0505326	2.45	-3.8245		1.22744	Rasd1
1369595_at	0.0505954	0.0505954	-2.45	-3.8257		-0.385485	Fgf23
1367972_at	0.0506558	0.0506558	2.45	-3.8268		0.46971	Cand1
1371389_at	0.0507511	0.0507511	-2.45	-3.8286		-0.566494	LOC306766
1369313_at	0.0507666	0.0507666	-2.45	-3.8289		-0.367721	Fhl2
1387926_at	0.0507794	0.0507794	-2.44	-3.8291		-0.394227	Sc5d
1375987_at	0.0508634	0.0508634	2.44	-3.8307		0.546809	Cerk
1367564_at	0.0508635	0.0508635	-2.44	-3.8307		-0.750364	Nppa
1388602_at	0.0509994	0.0509994	2.44	-3.8332		0.492686	Cfd
1373016_at	0.0510158	0.0510158	-2.44	-3.8335		-0.427103	Dld
1368182_at	0.0510176	0.0510176	-2.44	-3.8335		-1.16014	Acsl6
1377367_at	0.0510341	0.0510341	2.44	-3.8338		0.374624	Kazald1
1368671_at	0.0511608	0.0511608	2.44	-3.8362		0.383735	Srpx
1372919_at	0.0512645	0.0512645	2.44	-3.8381		0.519675	Gpat4
1368308_at	0.0512737	0.0512737	2.44	-3.8383		1.25698	Myc
1387555_at	0.0513007	0.0513007	-2.44	-3.8388		-0.770321	Asic1
1368815_at	0.0513025	0.0513025	-2.44	-3.8388		-0.735132	Mpz
1371336_at	0.051316	0.051316	2.44	-3.8391		0.428071	Hn1
1372532_at	0.051333	0.051333	-2.44	-3.8394		-0.404156	Pitpnm2
1370921_at	0.0513577	0.0513577	2.44	-3.8398		0.397116	Scamp3
1369252_a_at	0.0513594	0.0513594	-2.44	-3.8399		-1.51166	Chrna4
1371537_at	0.051374	0.051374	2.44	-3.8401		0.640926	B4galt5
1370608_at	0.0513897	0.0513897	-2.44	-3.8404		-0.625778	Hmox2-ps1
1370354_at	0.051422	0.051422	2.44	-3.841		0.34917	Parg
1370196_at	0.0514521	0.0514521	2.44	-3.8416		0.386747	Pias3
1377420_at	0.0515003	0.0515003	-2.43	-3.8424		-0.616716	Ttll3
1376645_at	0.0515329	0.0515329	2.43	-3.843		0.325213	Medag
1399102_at	0.0515416	0.0515416	2.43	-3.8432		0.567493	Slc38a10
1389611_at	0.0517278	0.0517278	-2.43	-3.8466		-0.395096	Vldlr
1389726_at	0.0517437	0.0517437	-2.43	-3.8469		-0.544481	Lsm11
1374103_at	0.0517558	0.0517558	-2.43	-3.8471		-0.971934	Ncs1
1386884_at	0.0517604	0.0517604	2.43	-3.8472		0.517732	Htra1
1372407_at	0.0518609	0.0518609	-2.43	-3.8491		-0.693169	Tmod4
1390508_at	0.0519692	0.0519692	-2.43	-3.851		-0.337736	Paip2b
1388314_at	0.0519878	0.0519878	2.43	-3.8514		0.378991	LOC100911295///LOC691642///Hmgn1
1388428_at	0.0519911	0.0519911	2.43	-3.8514		0.493736	Dtd1
1389222_at	0.052	0.052	2.43	-3.8516		0.990223	LOC691143
1373682_at	0.052	0.052	2.43	-3.8516		0.532426	Ddx51
1387389_at	0.0520174	0.0520174	2.43	-3.8519		1.35193	Ramp3
1370071_at	0.0520402	0.0520402	2.43	-3.8523		0.530423	Ada
1390706_at	0.0520767	0.0520767	-2.43	-3.853		-0.496924	Sptbn1
1367688_at	0.0521229	0.0521229	2.43	-3.8538		0.518503	Scamp4
1387146_a_at	0.0521401	0.0521401	2.43	-3.8541		0.370804	Ednrb
1389660_at	0.0522172	0.0522172	2.42	-3.8555		0.402977	Amigo3
1398320_at	0.052233	0.052233	-2.42	-3.8558		-0.484051	Pfkfb2
1374129_at	0.0523441	0.0523441	-2.42	-3.8578		-0.423237	Oaz2
1373270_at	0.0523524	0.0523524	-2.42	-3.858		-0.530924	Wipi1
1399009_at	0.052368	0.052368	2.42	-3.8583		0.500555	Ints4
1372277_at	0.0524467	0.0524467	-2.42	-3.8597		-0.560539	Aldh4a1
1386957_at	0.0524581	0.0524581	2.42	-3.8599		0.732956	Pom121
1389386_at	0.0524701	0.0524701	-2.42	-3.8601		-0.367883	Tcaim
1375785_at	0.052519	0.052519	-2.42	-3.861		-0.501642	Fktn
1374124_at	0.0525413	0.0525413	-2.42	-3.8614		-0.519712	Jmjd8
1371665_at	0.0525527	0.0525527	-2.42	-3.8616		-0.340709	Smarcd3
1375085_at	0.0526029	0.0526029	-2.42	-3.8625		-1.31282	Slc25a35
1398778_at	0.0526089	0.0526089	2.42	-3.8626		0.510879	Psma1
1389533_at	0.0526342	0.0526342	2.42	-3.8631		0.527737	Fbln2
1390677_at	0.0526361	0.0526361	2.42	-3.8631		1.07947	Fibcd1
1367749_at	0.0526467	0.0526467	2.42	-3.8633		0.481815	Lum
1371961_at	0.0526982	0.0526982	2.42	-3.8642		1.13144	Pld3
1388681_at	0.0527566	0.0527566	-2.42	-3.8653		-0.408651	Sar1b
1371482_at	0.0530253	0.0530253	-2.41	-3.8701		-0.398314	Ndufs2
1371563_at	0.0530273	0.0530273	2.41	-3.8701		0.762814	Rcc2
1388156_at	0.0530482	0.0530482	2.41	-3.8705		1.25348	Plcb3
1368424_at	0.0531153	0.0531153	2.41	-3.8717		0.345925	Ikbkb
1389742_at	0.0531224	0.0531224	2.41	-3.8718		0.455423	Zfp217
1372035_at	0.053167	0.053167	2.41	-3.8726		0.649593	Ift52
1389927_at	0.0531711	0.0531711	-2.41	-3.8727		-0.417274	Zmiz1
1369786_at	0.0531724	0.0531724	2.41	-3.8727		1.58584	Chrm5
1388550_at	0.0532959	0.0532959	2.41	-3.8749		0.565722	Rad23b
1372062_at	0.0533423	0.0533423	2.41	-3.8757		0.570394	Cinp
1398244_at	0.0533711	0.0533711	-2.41	-3.8762		-0.343919	Syf2
1369796_at	0.0535277	0.0535277	-2.41	-3.879		-0.880566	Gjd2
1376751_at	0.0535434	0.0535434	2.41	-3.8793		1.45526	Stk19
1375849_at	0.0535501	0.0535501	-2.41	-3.8794		-0.40899	Rgma
1367587_at	0.0537326	0.0537326	-2.4	-3.8826		-0.909549	Prl3d4
1377379_at	0.053807	0.053807	-2.4	-3.8839		-0.375549	Irf6
1388934_at	0.0538429	0.0538429	-2.4	-3.8846		-0.425413	Vps16
1371786_at	0.0539245	0.0539245	-2.4	-3.886		-0.38446	Trim35
1370344_at	0.0539445	0.0539445	-2.4	-3.8864		-0.540296	Hspa4
1368298_at	0.0539624	0.0539624	-2.4	-3.8867		-0.409954	Adcy5
1389961_at	0.0540093	0.0540093	2.4	-3.8875		1.77142	LOC683605///Sdccag3
1368017_at	0.0540279	0.0540279	-2.4	-3.8878		-1.3707	Lgals7
1367918_at	0.0540362	0.0540362	2.4	-3.888		0.479452	Fez1
1368927_at	0.0540612	0.0540612	2.4	-3.8884		0.665373	Esyt1
1368294_at	0.0540679	0.0540679	-2.4	-3.8885		-0.356749	Dnase1l3
1370422_at	0.0540769	0.0540769	2.4	-3.8887		0.650903	Ripk3
1392996_at	0.0541256	0.0541256	-2.4	-3.8895		-0.719239	Cpeb1
1398378_at	0.054179	0.054179	-2.4	-3.8905		-0.521806	Gstk1
1387380_at	0.0542004	0.0542004	-2.4	-3.8908		-0.397506	Slc32a1
1372752_at	0.0542319	0.0542319	2.4	-3.8914		0.886917	LOC100911766///Tspan4
1389807_at	0.0542464	0.0542464	2.4	-3.8916		0.591432	RGD1308065
1368482_at	0.0543011	0.0543011	2.4	-3.8926		0.876375	Bcl2a1
1371299_at	0.0543475	0.0543475	2.39	-3.8934		0.348738	Rps3
1388403_at	0.0543511	0.0543511	-2.39	-3.8935		-0.383231	Idh2
1371970_at	0.0543968	0.0543968	2.39	-3.8943		0.902462	Fam111a
1386473_at	0.0544849	0.0544849	-2.39	-3.8958		-0.563495	Dcaf6
1367991_at	0.0545019	0.0545019	2.39	-3.8961		0.485232	Gcs1
1375727_at	0.054507	0.054507	-2.39	-3.8962		-0.961374	Kctd13
1373186_at	0.0545569	0.0545569	-2.39	-3.897		-0.34766	Slain2
1370910_at	0.0545701	0.0545701	2.39	-3.8973		0.364655	Rfc2
1367589_at	0.0545966	0.0545966	-2.39	-3.8977		-0.453086	Aco2
1373195_at	0.0546706	0.0546706	2.39	-3.899		0.414358	RGD1566093///Fus
1389689_at	0.0546754	0.0546754	-2.39	-3.8991		-0.659981	Vars2
1389936_at	0.0546778	0.0546778	-2.39	-3.8991		-1.49327	LOC687035
1369608_at	0.0547263	0.0547263	-2.39	-3.9		-0.970963	Fgf16
1370299_at	0.0547697	0.0547697	-2.39	-3.9007		-1.48249	Aldob
1375033_at	0.0547944	0.0547944	-2.39	-3.9011		-1.31203	Cpt1c
1367604_at	0.0547974	0.0547974	-2.39	-3.9012		-0.347636	Crip2
1372886_at	0.0549013	0.0549013	2.39	-3.903		0.612982	Tacc3
1389825_at	0.0550315	0.0550315	-2.39	-3.9052		-1.37642	Tlx2
1373760_at	0.0550504	0.0550504	-2.39	-3.9055		-0.3636	Tars2
1374902_at	0.055064	0.055064	2.38	-3.9058		0.648366	Iqgap3
1368856_at	0.055065	0.055065	2.38	-3.9058		0.726257	Jak2
1373371_a_at	0.0550786	0.0550786	-2.38	-3.906		-0.436064	Fmc1
1387508_at	0.0550966	0.0550966	-2.38	-3.9063		-0.874238	Baat
1388323_at	0.0551905	0.0551905	-2.38	-3.908		-0.344001	Ndufa9
1374838_at	0.0551999	0.0551999	2.38	-3.9081		0.481192	Sp140
1389016_at	0.0552196	0.0552196	-2.38	-3.9085		-0.36212	Usp4
1390329_at	0.0552577	0.0552577	-2.38	-3.9091		-1.30819	Mfap3
1368407_at	0.0552758	0.0552758	2.38	-3.9094		0.722979	Hpse
1388628_at	0.0553076	0.0553076	2.38	-3.91		0.791062	Tmed3
1371347_at	0.0553168	0.0553168	-2.38	-3.9101		-0.429406	Tmem50b
1367776_at	0.0553674	0.0553674	2.38	-3.911		0.922147	Cdk1
1371827_at	0.0553689	0.0553689	2.38	-3.911		0.533189	LOC100910831///Syvn1
1398796_at	0.0553706	0.0553706	2.38	-3.911		0.469769	Tmed10
1367881_at	0.0553814	0.0553814	2.38	-3.9112		0.572087	Sirpa
1369340_at	0.0553939	0.0553939	-2.38	-3.9114		-0.51129	Srcin1
1376766_at	0.0554093	0.0554093	2.38	-3.9117		0.586379	Fmnl1
1374457_at	0.0554855	0.0554855	2.38	-3.913		0.504125	Sptlc2
1374828_at	0.0555128	0.0555128	2.38	-3.9135		1.66772	Pdia5
1376585_at	0.0555203	0.0555203	-2.38	-3.9136		-0.349263	Mrpl50
1373466_at	0.0555328	0.0555328	2.38	-3.9138		0.479393	Cast
1372328_at	0.0555387	0.0555387	-2.38	-3.9139		-0.560971	Klc4
1368655_at	0.0555887	0.0555887	2.38	-3.9148		0.710765	Srgn
1370707_at	0.0557173	0.0557173	-2.38	-3.9169		-0.502439	Fev
1372729_at	0.0557217	0.0557217	2.38	-3.917		0.723845	Procr
1369205_at	0.0557389	0.0557389	-2.38	-3.9173		-0.832596	Neurog1
1372503_at	0.0557522	0.0557522	2.38	-3.9175		0.582933	Tnfsf12
1367930_at	0.0557624	0.0557624	2.38	-3.9177		0.663933	Gap43
1369984_at	0.0557785	0.0557785	-2.38	-3.918		-0.334722	Cox17
1380854_at	0.0557848	0.0557848	-2.38	-3.9181		-0.536881	Vegfb
1388986_at	0.0558267	0.0558267	2.37	-3.9188		0.393442	Klf6
1376588_at	0.0558615	0.0558615	2.37	-3.9194		0.607968	Mtmr12
1374921_at	0.0558993	0.0558993	2.37	-3.92		0.57714	Rtel1
1368110_a_at	0.0559323	0.0559323	-2.37	-3.9206		-1.10256	Syngap1
1368143_at	0.0559355	0.0559355	2.37	-3.9206		0.489673	Anxa7
1374653_at	0.0559751	0.0559751	-2.37	-3.9213		-0.39504	Miga2
1375615_at	0.0559838	0.0559838	-2.37	-3.9214		-1.81218	Ntrk1
1373953_at	0.0560061	0.0560061	-2.37	-3.9218		-0.396506	Slc4a1ap
1370534_at	0.0560849	0.0560849	-2.37	-3.9232		-0.647144	Acvr1c
1374993_at	0.0561549	0.0561549	-2.37	-3.9243		-0.503464	Rpusd1
1376831_at	0.056155	0.056155	2.37	-3.9243		1.09376	Fam64a
1376787_at	0.05617	0.05617	-2.37	-3.9246		-0.577422	Lingo2
1373233_at	0.0561971	0.0561971	2.37	-3.925		0.634064	Lhfpl2
1373291_at	0.0564112	0.0564112	-2.37	-3.9286		-0.443719	Dlc1
1375480_at	0.0564588	0.0564588	-2.37	-3.9294		-0.787558	Kat6b
1371592_at	0.0564652	0.0564652	2.37	-3.9295		0.604418	Csk
1374765_at	0.0565219	0.0565219	-2.37	-3.9305		-0.77758	Bdh1
1388898_at	0.0565515	0.0565515	2.37	-3.931		0.417706	Hsph1
1389282_at	0.0565626	0.0565626	2.37	-3.9312		0.409679	Itga3
1389118_s_at	0.0565752	0.0565752	-2.36	-3.9314		-0.950138	S100a14
1375027_at	0.0566186	0.0566186	-2.36	-3.9321		-0.409541	Ccpg1
1386891_at	0.0566656	0.0566656	-2.36	-3.9329		-0.380761	Pebp1
1377563_at	0.0566738	0.0566738	-2.36	-3.933		-0.558868	Lmod3
1372290_at	0.0566996	0.0566996	2.36	-3.9335		0.626539	Nelfe
1372862_at	0.0568121	0.0568121	-2.36	-3.9353		-0.85986	Rab22a
1370454_at	0.056823	0.056823	-2.36	-3.9355		-0.616634	Homer1
1392057_at	0.05683	0.05683	-2.36	-3.9356		-0.672256	LOC100911986///Gli4
1367895_at	0.0568526	0.0568526	2.36	-3.936		0.470038	LOC100363335///Hnrnpk
1368571_at	0.0568605	0.0568605	2.36	-3.9361		0.583631	Clip2
1389494_at	0.0569697	0.0569697	2.36	-3.9379		0.363769	Rps6ka4
1376572_a_at	0.0570311	0.0570311	-2.36	-3.939		-0.357729	Svil
1368404_at	0.057043	0.057043	2.36	-3.9392		0.755325	Dbn1
1370054_at	0.057123	0.057123	2.36	-3.9405		0.515868	Cdkn2c
1371712_at	0.0571294	0.0571294	2.36	-3.9406		0.423596	Lsm2
1369859_at	0.0571812	0.0571812	-2.36	-3.9414		-1.36461	Nr5a1
1371525_at	0.0571869	0.0571869	-2.36	-3.9415		-0.423665	Slc12a7
1369288_at	0.0571877	0.0571877	-2.36	-3.9416		-1.09511	Pitx1
1371040_at	0.057198	0.057198	2.36	-3.9417		1.02701	Slc1a5
1387372_at	0.0572089	0.0572089	-2.36	-3.9419		-1.56989	Slc6a13
1376990_at	0.057235	0.057235	-2.36	-3.9423		-0.31528	Khnyn
1373104_at	0.0572411	0.0572411	-2.36	-3.9424		-0.717167	Specc1l
1368533_at	0.0572418	0.0572418	2.36	-3.9424		0.45473	Heph
1389175_at	0.0572519	0.0572519	2.36	-3.9426		0.532179	Nelfa
1388506_at	0.0572599	0.0572599	-2.36	-3.9427		-0.404503	Dsp
1367735_at	0.0572966	0.0572966	-2.36	-3.9434		-0.347699	Acadl
1376267_at	0.0573185	0.0573185	-2.36	-3.9437		-0.659557	Slc16a6
1389210_at	0.057322	0.057322	2.36	-3.9438		0.836588	Lcp1
1370037_at	0.0573367	0.0573367	-2.36	-3.944		-0.588017	Fbn2
1370061_at	0.0573761	0.0573761	-2.35	-3.9447		-0.521224	Rab3b
1370887_at	0.0574738	0.0574738	2.35	-3.9463		0.355405	Tgfb1i1
1376646_at	0.0574933	0.0574933	-2.35	-3.9466		-0.412923	Popdc2
1382944_at	0.0574935	0.0574935	2.35	-3.9466		1.42571	Ero1b
1389525_at	0.0576694	0.0576694	2.35	-3.9495		0.490557	Rnf149
1375322_at	0.0576702	0.0576702	-2.35	-3.9495		-1.43641	Sema6c
1377116_at	0.0577036	0.0577036	2.35	-3.95		0.468222	Rnasel
1373697_at	0.0577146	0.0577146	2.35	-3.9502		0.573492	Mybpc2
1370334_at	0.0577663	0.0577663	-2.35	-3.9511		-0.391369	Plekhb1
AFFX_Rat_GAPDH_M_at	0.0578098	0.0578098	-2.35	-3.9518		-0.397966	Gapdh
1368844_at	0.0579268	0.0579268	2.35	-3.9537		0.456687	Hspa13
1372270_at	0.057931	0.057931	2.35	-3.9538		0.353539	Dpagt1
1371861_at	0.0579319	0.0579319	2.35	-3.9538		0.383495	Sfrp1
1389200_at	0.057943	0.057943	2.35	-3.954		0.530918	Bysl
1368249_at	0.0580234	0.0580234	-2.35	-3.9553		-0.667079	Klf15
1387027_a_at	0.0580239	0.0580239	2.35	-3.9553		0.402708	Lgals9
1370844_at	0.0580391	0.0580391	2.35	-3.9555		0.48318	Hnrnpf
1390200_at	0.0580422	0.0580422	2.35	-3.9556		0.518272	Fkbp15
1389308_at	0.0580707	0.0580707	2.35	-3.956		0.504719	Dnajb11
1374510_at	0.0582045	0.0582045	-2.34	-3.9582		-0.596993	Ppp1r3f
1369712_at	0.0582092	0.0582092	2.34	-3.9583		0.459939	Stk3
1387544_at	0.0582535	0.0582535	-2.34	-3.959		-0.854678	Mk1
1374082_at	0.0582999	0.0582999	-2.34	-3.9598		-0.306782	Ndufaf7
1388864_at	0.0584285	0.0584285	2.34	-3.9618		0.359637	Ddx54
1369478_at	0.0585254	0.0585254	-2.34	-3.9634		-0.83056	Nr0b1
1374661_at	0.0585485	0.0585485	2.34	-3.9638		0.338599	Aldh16a1
1388361_at	0.0585969	0.0585969	-2.34	-3.9645		-0.407099	Ndufb10
1369591_at	0.058775	0.058775	-2.34	-3.9674		-0.498748	Csn3
1386114_at	0.0589243	0.0589243	-2.33	-3.9698		-0.539201	Ints6l
1372242_at	0.0589601	0.0589601	2.33	-3.9704		0.387147	Ddx3x
1373020_at	0.0589674	0.0589674	-2.33	-3.9705		-0.341526	Pam16
1370400_at	0.0590174	0.0590174	2.33	-3.9713		0.762107	RT1-N3
1372422_at	0.0590274	0.0590274	-2.33	-3.9715		-0.501143	Mmp24
1371839_at	0.059114	0.059114	2.33	-3.9728		0.541232	Srsf2
1375714_at	0.0591724	0.0591724	2.33	-3.9738		0.469319	Erbin
1376606_a_at	0.059247	0.059247	2.33	-3.975		0.492456	Eny2
1371312_at	0.0593322	0.0593322	-2.33	-3.9763		-0.346318	Chchd2
1369310_at	0.0594022	0.0594022	2.33	-3.9774		2.41645	Basp1
1367460_at	0.0594521	0.0594521	2.33	-3.9782		0.388729	Gdi2
1372880_at	0.0594604	0.0594604	2.33	-3.9784		1.87446	Zbtb17
1369622_at	0.0594796	0.0594796	2.33	-3.9787		1.77738	Prok2
1370292_a_at	0.059483	0.059483	2.33	-3.9787		1.10475	Crygc
1368645_at	0.0594979	0.0594979	-2.33	-3.979		-0.41309	Ptpn1
1388658_at	0.0595054	0.0595054	-2.33	-3.9791		-0.373934	LOC100912042///Surf2
1387130_at	0.0595372	0.0595372	2.33	-3.9796		0.719588	LOC100911874///Slc40a1
1388345_at	0.0595563	0.0595563	2.33	-3.9799		0.480627	Pak2
1388177_at	0.0595634	0.0595634	-2.33	-3.98		-0.636459	Ddn
1389808_at	0.0595679	0.0595679	-2.33	-3.9801		-0.456573	Prcd
1372067_at	0.0595747	0.0595747	2.33	-3.9802		0.410253	Tmx1
1368281_at	0.0595877	0.0595877	-2.33	-3.9804		-0.348812	Dpep1
1373378_at	0.0596135	0.0596135	-2.33	-3.9808		-0.386843	Agtpbp1
1376627_at	0.0596202	0.0596202	2.33	-3.9809		0.558217	C1galt1
1369632_a_at	0.0596257	0.0596257	-2.33	-3.981		-0.494662	Abcc8
1387396_at	0.0597096	0.0597096	2.33	-3.9823		1.06506	Hamp
1387047_at	0.0597118	0.0597118	-2.33	-3.9823		-0.390924	Hspb3
1372486_at	0.0597253	0.0597253	-2.32	-3.9826		-0.350062	Cul5
1370985_at	0.0598321	0.0598321	2.32	-3.9842		0.720718	LOC100912585///Mapk7
1389050_at	0.0598439	0.0598439	-2.32	-3.9844		-0.384137	LOC100365414///Dusp3
1388397_at	0.0598722	0.0598722	2.32	-3.9849		0.630357	LOC100912375///Ebna1bp2
1370295_at	0.0598725	0.0598725	2.32	-3.9849		0.609286	Nme1
1398896_at	0.0598957	0.0598957	2.32	-3.9852		0.320909	Arcn1
1370631_at	0.0599321	0.0599321	2.32	-3.9858		1.28307	Reg3g
1369798_at	0.0599549	0.0599549	-2.32	-3.9862		-1.1689	Atp1b2
1389548_at	0.0599865	0.0599865	-2.32	-3.9867		-0.501629	Adhfe1
1372589_at	0.0599975	0.0599975	-2.32	-3.9868		-0.354501	Uqcc1
1374925_at	0.0600117	0.0600117	2.32	-3.9871		0.345772	Nab2
1368801_at	0.0600629	0.0600629	2.32	-3.9879		0.531206	Cxxc4
1373420_at	0.0600642	0.0600642	-2.32	-3.9879		-0.452129	Ecsit
1391518_at	0.06014	0.06014	2.32	-3.9891		0.46315	Cenpw
1390501_at	0.0601933	0.0601933	-2.32	-3.9899		-0.404085	Scrn3
1388622_at	0.0602045	0.0602045	2.32	-3.9901		0.606787	Nop56
1371634_at	0.0602528	0.0602528	-2.32	-3.9909		-0.38295	Tmem126a
1398614_at	0.0602808	0.0602808	-2.32	-3.9913		-1.562	Ptch1
1370404_at	0.0602925	0.0602925	2.32	-3.9915		0.833916	Cst12
1376003_at	0.0603026	0.0603026	-2.32	-3.9916		-1.13281	Ankle2
1371661_at	0.0603063	0.0603063	-2.32	-3.9917		-0.41208	Mrps23
1389334_at	0.0603938	0.0603938	-2.32	-3.9931		-0.392361	Ndufa10///Ndufa10l1
1372380_at	0.0604109	0.0604109	-2.32	-3.9933		-0.396888	Rbpms
1376381_at	0.060421	0.060421	-2.32	-3.9935		-0.552043	Xkr5
1369575_at	0.0604334	0.0604334	2.32	-3.9937		1.50836	Tas2r114
1375559_at	0.0604365	0.0604365	2.32	-3.9937		0.497615	Trip6
1369163_at	0.0604372	0.0604372	2.32	-3.9937		1.82363	Grik4
1374355_at	0.0604762	0.0604762	2.32	-3.9943		0.387745	Pced1b
1374972_at	0.0604879	0.0604879	2.32	-3.9945		0.631699	Tbc1d2
1370690_at	0.0604915	0.0604915	-2.32	-3.9946		-0.351402	LOC100912578///Hspa9
1368370_at	0.0605197	0.0605197	2.32	-3.995		0.558134	Adcy4
1388507_at	0.0605364	0.0605364	2.32	-3.9953		0.323614	Eif6
1372365_at	0.0605602	0.0605602	2.31	-3.9957		0.423952	Rin2
1376684_at	0.0606015	0.0606015	2.31	-3.9963		0.540361	Dlgap5
1369828_at	0.0606648	0.0606648	2.31	-3.9973		0.732014	Csf2rb
1373137_at	0.0606718	0.0606718	2.31	-3.9974		0.495998	Xxylt1
1390129_at	0.0608732	0.0608732	2.31	-4.0005		0.377052	Lats1
1374423_at	0.0608973	0.0608973	2.31	-4.0009		0.448784	Mfsd14a
1388223_at	0.0609109	0.0609109	-2.31	-4.0011		-2.09242	Gnat3
1375298_at	0.060917	0.060917	-2.31	-4.0012		-0.352486	Ppp2r5c
1386987_at	0.0609813	0.0609813	2.31	-4.0022		0.517535	Il6r
1371527_at	0.0610698	0.0610698	2.31	-4.0036		0.538128	Emp1
1390178_at	0.0611011	0.0611011	2.31	-4.004		0.39042	Srprb
1373822_at	0.0611216	0.0611216	2.31	-4.0044		0.43991	RGD1565363
1374438_at	0.0611252	0.0611252	-2.31	-4.0044		-0.416108	Otud4
1372092_at	0.0611485	0.0611485	-2.31	-4.0048		-0.368494	Trak2
1375303_at	0.0611633	0.0611633	-2.31	-4.005		-0.459697	Ldb3
1374063_at	0.0612269	0.0612269	2.31	-4.006		0.382698	LOC100910660///Srsf3
1369421_at	0.0612274	0.0612274	2.31	-4.006		0.420186	Top1
1372720_at	0.0612391	0.0612391	-2.31	-4.0062		-0.443818	Btbd1
1369527_at	0.0612739	0.0612739	2.31	-4.0067		0.466426	Cx3cr1
1374476_at	0.0613014	0.0613014	-2.31	-4.0071		-0.299361	Fxr1
1398773_at	0.0613739	0.0613739	2.3	-4.0082		0.317622	Khdrbs1
1373130_at	0.0614113	0.0614113	-2.3	-4.0088		-0.375469	Myom2
1373901_at	0.0614398	0.0614398	2.3	-4.0092		0.341923	Cdk2ap2
1387435_at	0.0614895	0.0614895	-2.3	-4.01		-0.410348	St8sia3
1390525_a_at	0.0615669	0.0615669	2.3	-4.0112		1.71762	Stra6
1389758_at	0.0616816	0.0616816	-2.3	-4.013		-0.756943	Tada2a
1371948_at	0.0616879	0.0616879	-2.3	-4.013		-0.373823	Pigp
1372582_at	0.0617016	0.0617016	2.3	-4.0133		0.371727	Csnk1g3
1388948_at	0.0617077	0.0617077	-2.3	-4.0134		-0.422633	Stard10
1371731_at	0.061726	0.061726	2.3	-4.0136		0.476405	Mest
1373105_at	0.0619353	0.0619353	-2.3	-4.0168		-0.332534	Tmed1
1390947_at	0.0619447	0.0619447	2.3	-4.017		0.447077	Heatr5a
1369242_at	0.0619506	0.0619506	-2.3	-4.0171		-0.563217	Pax6
1386880_at	0.0620204	0.0620204	-2.3	-4.0181		-0.51252	Acaa2
1374194_at	0.0620519	0.0620519	2.3	-4.0186		0.449102	Slc39a11
1375174_at	0.0621184	0.0621184	2.3	-4.0196		0.568024	Dpy19l1
1371093_at	0.0621757	0.0621757	-2.3	-4.0205		-1.78932	Scaper
1370156_at	0.0621873	0.0621873	-2.3	-4.0206		-0.444157	Prnp
1376652_at	0.0622011	0.0622011	2.3	-4.0209		0.447524	C1qa
1374695_at	0.062239	0.062239	2.29	-4.0214		0.541858	Cbx1
1387001_at	0.0622504	0.0622504	2.29	-4.0216		0.414272	Ralb
1372084_at	0.0622732	0.0622732	-2.29	-4.0219		-0.406107	Ptp4a3
1373652_at	0.0623178	0.0623178	-2.29	-4.0226		-0.348306	Cnst
1375197_at	0.0623281	0.0623281	-2.29	-4.0228		-0.338468	Uqcr11///LOC686442
1372288_at	0.0623317	0.0623317	-2.29	-4.0228		-0.330398	Zmiz2
1372091_at	0.0623723	0.0623723	-2.29	-4.0234		-0.343111	Mid1ip1
1388605_at	0.062375	0.062375	-2.29	-4.0235		-1.77815	Wfdc3
1389253_at	0.0623763	0.0623763	-2.29	-4.0235		-0.345849	Vnn1
1371796_at	0.062377	0.062377	-2.29	-4.0235		-0.428512	Tmx2
1375769_at	0.0624141	0.0624141	2.29	-4.0241		0.445607	Trim41
1390666_at	0.0624867	0.0624867	-2.29	-4.0252		-0.61007	Tex19.2
1371424_at	0.0624941	0.0624941	-2.29	-4.0253		-0.431303	Kdm8
1369083_at	0.0625081	0.0625081	-2.29	-4.0255		-0.439628	Cirbp
1398377_at	0.0625346	0.0625346	-2.29	-4.0259		-0.362841	Zfp672
1372447_at	0.0627012	0.0627012	2.29	-4.0284		0.372305	Fgfr1
1368109_at	0.0627114	0.0627114	-2.29	-4.0286		-0.399844	St3gal5
1368429_at	0.0627492	0.0627492	-2.29	-4.0291		-0.461134	Taf9b
1374973_at	0.0628697	0.0628697	-2.29	-4.0309		-0.922827	Med25
1370935_at	0.0629262	0.0629262	2.29	-4.0318		0.577759	Slc44a1
1389914_at	0.0629401	0.0629401	-2.29	-4.032		-1.74235	Casz1
1398540_at	0.0629924	0.0629924	2.29	-4.0328		0.664557	Rgs1
1386954_at	0.0630368	0.0630368	-2.29	-4.0334		-0.35095	Ak2
1376501_at	0.0630371	0.0630371	-2.29	-4.0334		-1.80346	Arhgap8
1374107_at	0.0630898	0.0630898	2.28	-4.0342		0.503061	Elac2
1372910_at	0.0631288	0.0631288	2.28	-4.0348		0.458964	Usp37
1398800_at	0.0631658	0.0631658	2.28	-4.0354		0.336596	Ywhab
1370278_at	0.0631881	0.0631881	-2.28	-4.0357		-0.407137	Atp5d
1372914_at	0.0632083	0.0632083	2.28	-4.036		0.605372	Ltbr
1377311_at	0.0633137	0.0633137	2.28	-4.0376		2.20229	Emx2
1389064_at	0.0633233	0.0633233	-2.28	-4.0377		-0.345333	Fem1c
1390281_a_at	0.0633518	0.0633518	-2.28	-4.0381		-0.540043	Coq10a
1372461_at	0.0634564	0.0634564	2.28	-4.0397		0.387637	Set
1373230_at	0.0634659	0.0634659	-2.28	-4.0398		-0.518579	Nudt18
1368189_at	0.0635048	0.0635048	2.28	-4.0404		0.385528	Dhcr7
1371657_at	0.063515	0.063515	2.28	-4.0406		0.467603	Uba2
1368890_at	0.0635471	0.0635471	-2.28	-4.041		-0.414886	Gnpat
1370312_at	0.063607	0.063607	2.28	-4.0419		0.35821	Spon1
1372396_at	0.0636105	0.0636105	-2.28	-4.042		-0.487383	Swsap1
1370314_at	0.0637472	0.0637472	2.28	-4.044		0.515018	Slc20a1
1377498_at	0.0637888	0.0637888	2.28	-4.0446		1.12862	Ampd2
1376010_at	0.0637996	0.0637996	2.28	-4.0448		0.440122	Prpf4b
1376035_at	0.0638551	0.0638551	-2.28	-4.0456		-0.558284	Ttc7b
1367670_at	0.0639112	0.0639112	-2.28	-4.0464		-0.417808	Fh
1387825_at	0.0639849	0.0639849	-2.27	-4.0475		-1.97059	Ugt2b
1389704_at	0.0640034	0.0640034	-2.27	-4.0478		-0.543622	Prob1
1375958_at	0.0640257	0.0640257	-2.27	-4.0481		-0.43442	Tsc22d4
1371335_at	0.064037	0.064037	-2.27	-4.0483		-0.426634	Atp5l
1370265_at	0.0640686	0.0640686	2.27	-4.0487		1.59084	Arrb2
1373281_at	0.0640897	0.0640897	-2.27	-4.049		-0.535264	Lmf1
1370868_at	0.0641072	0.0641072	2.27	-4.0493		0.709111	Krt1
1369725_at	0.0641243	0.0641243	2.27	-4.0495		1.48391	Adap2
1389133_at	0.0642118	0.0642118	2.27	-4.0508		0.604292	Slc30a6
1374861_at	0.0642345	0.0642345	-2.27	-4.0512		-0.389818	Tle2
1375063_at	0.0642515	0.0642515	2.27	-4.0514		0.724271	RGD1565166
1369742_at	0.0643291	0.0643291	-2.27	-4.0525		-1.03282	Herc1
1370567_at	0.0643608	0.0643608	-2.27	-4.053		-1.51968	Adra2b
1388908_at	0.0643917	0.0643917	-2.27	-4.0535		-0.464335	Eci2
1371315_at	0.0644047	0.0644047	-2.27	-4.0537		-0.80557	Myl7
1387696_a_at	0.0644071	0.0644071	-2.27	-4.0537		-0.718343	Glra2
1369011_at	0.0644485	0.0644485	-2.27	-4.0543		-0.469254	Apoa5
1387366_at	0.0644815	0.0644815	2.27	-4.0548		0.398799	Ilf3
1367690_at	0.0645028	0.0645028	2.27	-4.0551		0.339492	Ssr4
1375997_at	0.06458	0.06458	-2.27	-4.0562		-0.306861	RGD1311756
1388458_at	0.0646288	0.0646288	2.27	-4.0569		0.50416	Rfc4
1367939_at	0.0646314	0.0646314	2.27	-4.057		0.812689	Rbp1
1373509_at	0.0646445	0.0646445	-2.27	-4.0572		-0.382773	Nsun4
1373167_at	0.0646655	0.0646655	-2.27	-4.0575		-0.373472	Lrrc20
1388530_at	0.0646853	0.0646853	2.27	-4.0577		0.462946	Cdc42se1
1368617_at	0.064693	0.064693	-2.27	-4.0579		-0.617127	Serpina5
1387373_at	0.0648537	0.0648537	-2.26	-4.0602		-0.420752	Pde4dip
1373118_at	0.0648578	0.0648578	-2.26	-4.0603		-0.81257	Camsap3
1388666_at	0.0648717	0.0648717	2.26	-4.0605		0.442313	Enc1
1375058_at	0.0648783	0.0648783	2.26	-4.0605		2.01157	Zrsr2
1370532_at	0.0649757	0.0649757	-2.26	-4.062		-1.27277	Pld1
1371728_at	0.0650516	0.0650516	-2.26	-4.0631		-0.434715	Ube3b
1375852_at	0.0650662	0.0650662	2.26	-4.0633		0.63989	Hmgcr
1375803_at	0.0651491	0.0651491	2.26	-4.0645		0.715417	Ptger1
1374393_at	0.0651853	0.0651853	2.26	-4.065		0.475121	Hacd2
1367643_at	0.065222	0.065222	-2.26	-4.0655		-0.424293	Bsg
1374265_at	0.065265	0.065265	-2.26	-4.0661		-0.352878	Nceh1
1371737_at	0.0653469	0.0653469	2.26	-4.0673		0.339469	Trim27
1371793_at	0.0653521	0.0653521	-2.26	-4.0674		-0.451069	Ufsp1
1376616_at	0.0653578	0.0653578	-2.26	-4.0675		-0.565527	Csnk2a1
1367763_at	0.0653721	0.0653721	-2.26	-4.0677		-0.376059	Acat1
1389003_at	0.0653891	0.0653891	2.26	-4.0679		0.422276	Rhobtb3
1376495_at	0.0654269	0.0654269	-2.26	-4.0685		-0.746159	Sptb
1373538_at	0.0654324	0.0654324	2.26	-4.0686		0.539443	Usp1
1379703_at	0.0654689	0.0654689	2.26	-4.0691		0.366212	Dennd3
1373834_at	0.0655853	0.0655853	2.26	-4.0707		0.418268	Borcs8
1374839_at	0.0656312	0.0656312	-2.26	-4.0714		-0.394155	Spg7
1375763_at	0.0656482	0.0656482	-2.26	-4.0716		-0.385385	Heatr6
1373590_at	0.065655	0.065655	2.26	-4.0717		0.785903	Stom
1374343_at	0.0656904	0.0656904	2.26	-4.0723		0.753116	Pgap3
1370725_a_at	0.0657259	0.0657259	-2.25	-4.0728		-0.511197	Psme3///Aoc3///G6pc
1372416_at	0.0657544	0.0657544	2.25	-4.0732		1.57362	Nr2c1
1370250_at	0.0657546	0.0657546	2.25	-4.0732		0.290553	LOC102553386///Tmem215///Ube2i
1374450_at	0.0657908	0.0657908	2.25	-4.0737		1.24152	Ino80b
1398750_at	0.065797	0.065797	2.25	-4.0738		0.371212	Calr
1367660_at	0.0658479	0.0658479	-2.25	-4.0745		-0.428064	Fabp3
1387109_at	0.0658595	0.0658595	2.25	-4.0747		0.38741	Por
1374044_at	0.0658693	0.0658693	2.25	-4.0748		0.450968	Stra13
1398353_at	0.065877	0.065877	2.25	-4.0749		0.501902	Sar1a
1370356_at	0.0659311	0.0659311	2.25	-4.0757		0.336722	Rbm10
1367938_at	0.065994	0.065994	2.25	-4.0766		0.603906	Ugdh
1388301_at	0.0660172	0.0660172	-2.25	-4.0769		-0.382534	Uqcrc1
1387059_at	0.0660338	0.0660338	-2.25	-4.0772		-0.398262	Stk39
1375532_at	0.0660994	0.0660994	2.25	-4.0781		0.359943	Id2
[truncated: 9,106 more rows]

## Sheet: up
ID	adj.P.Val	P.Value	t	B	abslogFC	logFC	Gene.symbol	IGFBP2		IGFBP2
1367648_at	3.36e-05	3.36e-05	11.2	2.0403	1.734	1.734	Igfbp2	PMF1		PMF1
1374961_at	4.78e-05	4.78e-05	10.5	1.8522	2.21911	2.21911	Pmf1	THOC3		THOC3
1379849_at	4.94e-05	4.94e-05	10.5	1.8337	1.78005	1.78005	Thoc3	FOS		FOS
1375043_at	6.19e-05	6.19e-05	10.1	1.7064	2.35236	2.35236	Fos	TNIK		TNIK
1376562_at	6.49e-05	6.49e-05	9.97	1.6798	2.00683	2.00683	Tnik	HAVCR1		HAVCR1
1387965_at	7.35e-05	7.35e-05	9.75	1.6068	2.45776	2.45776	Havcr1	ANGPTL4		ANGPTL4
1388924_at	0.0001065	0.0001065	9.13	1.3803	2.12009	2.12009	Angptl4	LILRB4		LILRB4
1375917_at	0.0001066	0.0001066	9.13	1.38	3.54982	3.54982	Lilrb4	ZFP455		ZFP455
1370577_at	0.0001151	0.0001151	9	1.3313	2.86692	2.86692	Zfp455	ARHGAP25		ARHGAP25
1388940_at	0.0001378	0.0001378	8.71	1.2157	2.74386	2.74386	Arhgap25	SRPX2		SRPX2
1373000_at	0.0001748	0.0001748	8.35	1.0583	1.25632	1.25632	Srpx2	TNC		TNC
1373401_at	0.0001963	0.0001963	8.17	0.9795	2.23899	2.23899	Tnc	CXCL1		CXCL1
1387316_at	0.0002138	0.0002138	8.04	0.9208	2.92466	2.92466	Cxcl1	CASP1		CASP1
1369186_at	0.0002478	0.0002478	7.83	0.8176	1.04042	1.04042	Casp1	SDC1		SDC1
1367849_at	0.0002586	0.0002586	7.77	0.7875	1.63218	1.63218	Sdc1	CD53		CD53
1368518_at	0.0003683	0.0003683	7.28	0.5314	1.87673	1.87673	Cd53	PRR36		PRR36
1374211_at	0.0004789	0.0004789	6.93	0.3342	2.26404	2.26404	Prr36	TNFRSF11B		TNFRSF11B
1369407_at	0.0005217	0.0005217	6.82	0.2686	1.45831	1.45831	Tnfrsf11b	IL1R2		IL1R2
1387180_at	0.0005246	0.0005246	6.81	0.2644	3.05011	3.05011	Il1r2	LGALS3		LGALS3
1386879_at	0.0005332	0.0005332	6.79	0.2519	1.67803	1.67803	Lgals3	JAKMIP1		JAKMIP1
1389605_at	0.0005359	0.0005359	6.79	0.2481	1.45484	1.45484	Jakmip1	LOC686151		LOC686151
1389440_at	0.0005818	0.0005818	6.68	0.1844	2.97817	2.97817	LOC686151	IL18		IL18
1369665_a_at	0.0006074	0.0006074	6.63	0.1509	0.976981	0.976981	Il18	CGREF1		CGREF1
1370361_at	0.0007658	0.0007658	6.34	-0.0321	1.54708	1.54708	Cgref1	STX3		STX3
1390447_at	0.0007728	0.0007728	6.33	-0.0393	1.94606	1.94606	Stx3	CALD1		CALD1
1368823_at	0.0008085	0.0008085	6.28	-0.0756	2.09179	2.09179	Cald1	DEPDC1		DEPDC1
1376914_at	0.0008127	0.0008127	6.27	-0.0797	1.2391	1.2391	Depdc1	RGS14		RGS14
1369045_at	0.0008504	0.0008504	6.22	-0.1162	1.19541	1.19541	Rgs14	PSPH		PSPH
1375964_at	0.0008925	0.0008925	6.16	-0.1552	1.20087	1.20087	Psph	SIPA1		SIPA1
1375709_at	0.0010039	0.0010039	6.02	-0.2509	1.43773	1.43773	Sipa1	GLIPR1		GLIPR1
1373504_at	0.0010253	0.0010253	6	-0.2683	1.16652	1.16652	Glipr1	HMOX1		HMOX1
1370080_at	0.001048	0.001048	5.97	-0.2863	2.10193	2.10193	Hmox1	TMEM189		TMEM189
1375341_at	0.0010967	0.0010967	5.92	-0.3236	1.03228	1.03228	Tmem189	GPNMB		GPNMB
1368187_at	0.0011053	0.0011053	5.91	-0.3301	2.03589	2.03589	Gpnmb	SNRPA		SNRPA
1388436_at	0.0011168	0.0011168	5.9	-0.3386	2.7071	2.7071	Snrpa	RRBP1		RRBP1
1383500_at	0.001118	0.001118	5.9	-0.3395	2.69146	2.69146	Rrbp1	TEKT1		TEKT1
1368250_at	0.00117	0.00117	5.84	-0.3771	2.58343	2.58343	Tekt1	CPS1		CPS1
1384334_at	0.001227	0.001227	5.79	-0.4166	2.04264	2.04264	Cps1	TPM4		TPM4
1368838_at	0.0012345	0.0012345	5.78	-0.4217	1.40546	1.40546	Tpm4	FN1		FN1
1370234_at	0.0012501	0.0012501	5.77	-0.4322	1.44942	1.44942	Fn1	TUBB2B		TUBB2B
1388131_at	0.0013233	0.0013233	5.71	-0.4797	1.25031	1.25031	Tubb2b	EMB		EMB
1368541_at	0.0013345	0.0013345	5.7	-0.4868	1.24473	1.24473	Emb	SERPINB1A		SERPINB1A
1377034_at	0.0013518	0.0013518	5.68	-0.4976	1.36202	1.36202	Serpinb1a	CDK5RAP3		CDK5RAP3
1367879_at	0.0013561	0.0013561	5.68	-0.5003	1.7194	1.7194	Cdk5rap3	SOAT1		SOAT1
1369002_at	0.0013776	0.0013776	5.66	-0.5135	2.1315	2.1315	Soat1	TRPV2		TRPV2
1368735_a_at	0.0013947	0.0013947	5.65	-0.5239	2.96918	2.96918	Trpv2	B3GALNT1		B3GALNT1
1398373_at	0.0013977	0.0013977	5.65	-0.5257	1.36218	1.36218	B3galnt1	NS5ATP9		NS5ATP9
1388340_at	0.0014003	0.0014003	5.64	-0.5273	1.55794	1.55794	Ns5atp9	SYT17		SYT17
1398305_at	0.0014525	0.0014525	5.6	-0.5581	1.95903	1.95903	Syt17	GUSB		GUSB
1367901_at	0.0014756	0.0014756	5.59	-0.5714	0.738762	0.738762	Gusb	NAV1		NAV1
1373972_at	0.0015386	0.0015386	5.54	-0.6068	0.82754	0.82754	Nav1	RT1-DB1		RT1-DB1
1370382_at	0.0016701	0.0016701	5.45	-0.6765	3.18687	3.18687	RT1-Db1	ARG1		ARG1
1368266_at	0.0016763	0.0016763	5.45	-0.6797	1.75113	1.75113	Arg1	GPN2		GPN2
1374922_at	0.001686	0.001686	5.44	-0.6846	1.17179	1.17179	Gpn2	MCM2		MCM2
1374036_at	0.0017054	0.0017054	5.43	-0.6944	1.18883	1.18883	Mcm2	KIF20A		KIF20A
1373722_at	0.0017069	0.0017069	5.43	-0.6951	2.51304	2.51304	Kif20a	DDIAS		DDIAS
1378906_at	0.0017121	0.0017121	5.42	-0.6977	1.8165	1.8165	Ddias	ERAP1		ERAP1
1368356_a_at	0.0017382	0.0017382	5.41	-0.7106	1.02921	1.02921	Erap1	SAT1		SAT1
1371774_at	0.0017866	0.0017866	5.38	-0.7341	1.26814	1.26814	Sat1	ARPC1B		ARPC1B
1386925_at	0.0018807	0.0018807	5.32	-0.7782	1.0859	1.0859	Arpc1b	NIPSNAP3B		NIPSNAP3B
1371782_at	0.0019147	0.0019147	5.3	-0.7937	1.10391	1.10391	Nipsnap3b	PLOD2		PLOD2
1372897_at	0.0019439	0.0019439	5.29	-0.8067	1.24505	1.24505	Plod2	SGK1		SGK1
1367802_at	0.0019688	0.0019688	5.27	-0.8177	1.04667	1.04667	Sgk1	GPSM3		GPSM3
1372200_at	0.0019869	0.0019869	5.27	-0.8256	1.84962	1.84962	Gpsm3	PLS3		PLS3
1371139_at	0.0020154	0.0020154	5.25	-0.8379	1.95873	1.95873	Pls3	RNF165		RNF165
1390584_at	0.0020424	0.0020424	5.24	-0.8494	2.32578	2.32578	Rnf165	ACSL4		ACSL4
1387101_at	0.0020554	0.0020554	5.23	-0.8549	1.28708	1.28708	Acsl4	SEPHS1		SEPHS1
1389215_at	0.0020783	0.0020783	5.22	-0.8645	0.756198	0.756198	Sephs1	DDX39A		DDX39A
1387048_at	0.0020968	0.0020968	5.21	-0.8722	1.16204	1.16204	Ddx39a	MMP14		MMP14
1367860_a_at	0.0020988	0.0020988	5.21	-0.873	1.38766	1.38766	Mmp14	LOC100910669		LOC100910669
1376688_a_at	0.0021048	0.0021048	5.2	-0.8755	1.31814	1.31814	LOC100910669	CORO1A		CORO1A
1369964_at	0.002115	0.002115	5.2	-0.8797	1.30657	1.30657	Coro1a	ELFN2		ELFN2
1376902_x_at	0.0021214	0.0021214	5.2	-0.8823	1.25022	1.25022	Elfn2	ST8SIA1		ST8SIA1
1369867_at	0.0021939	0.0021939	5.16	-0.9115	1.06922	1.06922	St8sia1	MYRF		MYRF
1373321_at	0.0022094	0.0022094	5.15	-0.9176	2.58373	2.58373	Myrf	TYROBP		TYROBP
1374730_at	0.0022242	0.0022242	5.15	-0.9234	1.3806	1.3806	Tyrobp	FCRL6		FCRL6
1385245_at	0.0022388	0.0022388	5.14	-0.9291	1.92573	1.92573	Fcrl6	CDH11		CDH11
1388936_at	0.0022688	0.0022688	5.13	-0.9407	1.01312	1.01312	Cdh11	ANPEP		ANPEP
1386938_at	0.0022689	0.0022689	5.13	-0.9407	1.36848	1.36848	Anpep	ASNS		ASNS
1387925_at	0.0022761	0.0022761	5.12	-0.9435	0.818346	0.818346	Asns	PTPN18		PTPN18
1373065_at	0.0022956	0.0022956	5.11	-0.9509	1.05955	1.05955	Ptpn18	PRPF18		PRPF18
1388005_at	0.0023045	0.0023045	5.11	-0.9543	2.13591	2.13591	Prpf18	CCL2		CCL2
1367973_at	0.0023904	0.0023904	5.07	-0.9863	1.88981	1.88981	Ccl2	TPM3		TPM3
1398303_s_at	0.0024086	0.0024086	5.06	-0.9929	1.41278	1.41278	Tpm3	IL6		IL6
1369191_at	0.0024157	0.0024157	5.06	-0.9955	3.23186	3.23186	Il6	ZFP746		ZFP746
1389627_at	0.0024906	0.0024906	5.03	-1.0223	1.90333	1.90333	Zfp746	ACLY		ACLY
1367854_at	0.0026896	0.0026896	4.95	-1.0898	0.786603	0.786603	Acly	FABP5		FABP5
1370281_at	0.0026922	0.0026922	4.95	-1.0907	1.14057	1.14057	Fabp5	PLIN2		PLIN2
1390383_at	0.0026942	0.0026942	4.95	-1.0913	1.29068	1.29068	Plin2	RGD1561778		RGD1561778
1373889_at	0.0029018	0.0029018	4.88	-1.1569	1.96027	1.96027	RGD1561778	MAP3K9		MAP3K9
1382406_at	0.0029831	0.0029831	4.85	-1.1814	1.40668	1.40668	Map3k9	ALOX5AP		ALOX5AP
1369672_at	0.0029892	0.0029892	4.85	-1.1832	0.98993	0.98993	Alox5ap	GLRX		GLRX
1367705_at	0.0030307	0.0030307	4.83	-1.1954	1.30763	1.30763	Glrx	TUBB3		TUBB3
1371618_s_at	0.0030351	0.0030351	4.83	-1.1967	1.06967	1.06967	Tubb3	ACTN1		ACTN1
1389189_at	0.0030706	0.0030706	4.82	-1.2071	1.25521	1.25521	Actn1	CD14		CD14
1368490_at	0.0030798	0.0030798	4.82	-1.2097	1.4596	1.4596	Cd14	PTBP1		PTBP1
1367931_a_at	0.0031327	0.0031327	4.8	-1.2248	1.01435	1.01435	Ptbp1	MARCKS		MARCKS
1375523_at	0.0031841	0.0031841	4.78	-1.2393	0.989104	0.989104	Marcks	TWF1		TWF1
1371644_at	0.003197	0.003197	4.78	-1.2429	1.18752	1.18752	Twf1	CERS6		CERS6
1373207_at	0.0032302	0.0032302	4.77	-1.2521	1.16437	1.16437	Cers6	LEPROTL1		LEPROTL1
1374876_at	0.0032456	0.0032456	4.76	-1.2564	0.947238	0.947238	Leprotl1	VAV1		VAV1
1369387_at	0.0032569	0.0032569	4.76	-1.2595	0.721356	0.721356	Vav1	KLHL6		KLHL6
1377153_a_at	0.0033019	0.0033019	4.75	-1.2717	0.854406	0.854406	Klhl6	DNPH1		DNPH1
1368226_at	0.0033074	0.0033074	4.75	-1.2732	1.84034	1.84034	Dnph1	CTSZ		CTSZ
1370885_at	0.0033127	0.0033127	4.74	-1.2746	1.72256	1.72256	Ctsz	SLPI		SLPI
1367998_at	0.0033171	0.0033171	4.74	-1.2758	1.48003	1.48003	Slpi	PDPN		PDPN
1386913_at	0.0034249	0.0034249	4.71	-1.3044	1.24271	1.24271	Pdpn	RBM3		RBM3
1371583_at	0.0034429	0.0034429	4.71	-1.3091	0.992155	0.992155	Rbm3	RGD1311946		RGD1311946
1390232_at	0.0035574	0.0035574	4.68	-1.3383	1.15435	1.15435	RGD1311946	BCL2L15		BCL2L15
1392694_at	0.0035651	0.0035651	4.67	-1.3403	0.99037	0.99037	Bcl2l15	HS1BP3		HS1BP3
1389591_at	0.003585	0.003585	4.67	-1.3453	0.680128	0.680128	Hs1bp3	BCAT1		BCAT1
1370869_at	0.0036056	0.0036056	4.66	-1.3504	1.67368	1.67368	Bcat1	TMEM97		TMEM97
1372156_at	0.0036429	0.0036429	4.65	-1.3596	1.37011	1.37011	Tmem97	FCGR2B		FCGR2B
1371079_at	0.0036487	0.0036487	4.65	-1.361	1.90854	1.90854	Fcgr2b	TFPI2		TFPI2
1377340_at	0.003691	0.003691	4.64	-1.3714	0.951923	0.951923	Tfpi2	TUBB2A		TUBB2A
1373718_at	0.0037074	0.0037074	4.63	-1.3754	1.25319	1.25319	Tubb2a	PDK3		PDK3
1372229_at	0.003716	0.003716	4.63	-1.3775	0.690632	0.690632	Pdk3	EMP3		EMP3
1367914_at	0.0037939	0.0037939	4.61	-1.3961	1.12432	1.12432	Emp3	SH3BP5L		SH3BP5L
1389203_at	0.0038094	0.0038094	4.61	-1.3998	0.827337	0.827337	Sh3bp5l	CYBA		CYBA
1370219_at	0.0038885	0.0038885	4.59	-1.4183	1.03204	1.03204	Cyba	MEX3C		MEX3C
1389860_at	0.003915	0.003915	4.58	-1.4244	2.4958	2.4958	Mex3c	FBN1		FBN1
1368829_at	0.0040461	0.0040461	4.55	-1.4541	1.22019	1.22019	Fbn1	FCER1G		FCER1G
1373575_at	0.0040558	0.0040558	4.55	-1.4562	1.04971	1.04971	Fcer1g	PSAT1		PSAT1
1372665_at	0.0040678	0.0040678	4.55	-1.4589	2.68877	2.68877	Psat1	POLR1E		POLR1E
1376001_at	0.004081	0.004081	4.54	-1.4618	0.817356	0.817356	Polr1e	MMP7		MMP7
1368766_at	0.0041353	0.0041353	4.53	-1.4738	0.668631	0.668631	Mmp7	COL5A2		COL5A2
1370895_at	0.0041685	0.0041685	4.52	-1.481	0.839024	0.839024	Col5a2	PLAU		PLAU
1387675_at	0.0041923	0.0041923	4.52	-1.4861	1.40635	1.40635	Plau	REG3A		REG3A
1387930_at	0.0042087	0.0042087	4.51	-1.4896	0.909425	0.909425	Reg3a	PPP2R1B		PPP2R1B
1373959_at	0.0042374	0.0042374	4.51	-1.4958	0.933251	0.933251	Ppp2r1b	S100A11		S100A11
1375170_at	0.0042434	0.0042434	4.51	-1.4971	0.946836	0.946836	S100a11	CAPZA1		CAPZA1
1392900_at	0.0042498	0.0042498	4.5	-1.4984	0.716093	0.716093	Capza1	S100A8		S100A8
1368494_at	0.0043721	0.0043721	4.48	-1.5241	1.61785	1.61785	S100a8	TSPAN5		TSPAN5
1377089_a_at	0.0043764	0.0043764	4.48	-1.525	0.883416	0.883416	Tspan5	ELOVL1		ELOVL1
1398360_at	0.0045439	0.0045439	4.44	-1.5591	0.874814	0.874814	Elovl1	TKT		TKT
1386859_at	0.0045737	0.0045737	4.43	-1.565	1.21814	1.21814	Tkt	RBPJ		RBPJ
1379302_at	0.0045977	0.0045977	4.43	-1.5697	0.864884	0.864884	Rbpj	DPM2		DPM2
1367751_at	0.0046477	0.0046477	4.42	-1.5796	0.660197	0.660197	Dpm2	DAB2		DAB2
1368202_a_at	0.0046498	0.0046498	4.42	-1.58	0.95773	0.95773	Dab2	ZBTB34		ZBTB34
1373771_at	0.0046516	0.0046516	4.42	-1.5803	0.970216	0.970216	Zbtb34	PARP16		PARP16
1374693_at	0.0046693	0.0046693	4.41	-1.5838	0.757047	0.757047	Parp16	BUD13		BUD13
1377480_at	0.0046806	0.0046806	4.41	-1.586	0.906617	0.906617	Bud13	KPNB1		KPNB1
1368573_at	0.0047047	0.0047047	4.41	-1.5907	0.983069	0.983069	Kpnb1	G6PD		G6PD
1367856_at	0.0047066	0.0047066	4.41	-1.591	1.44468	1.44468	G6pd	CD300A		CD300A
1376675_at	0.0047192	0.0047192	4.4	-1.5935	1.48591	1.48591	Cd300a	DCHS1		DCHS1
1386422_at	0.0048232	0.0048232	4.38	-1.6133	2.47485	2.47485	Dchs1	PLPP5		PLPP5
1373160_at	0.0048388	0.0048388	4.38	-1.6162	0.858498	0.858498	Plpp5	GCH1		GCH1
1387221_at	0.0048927	0.0048927	4.37	-1.6263	0.680701	0.680701	Gch1	LTA4H		LTA4H
1389010_at	0.0049252	0.0049252	4.36	-1.6323	0.694223	0.694223	Lta4h	SRSF9		SRSF9
1374442_at	0.0050143	0.0050143	4.35	-1.6487	0.798171	0.798171	Srsf9	LITAF		LITAF
1370928_at	0.0051103	0.0051103	4.33	-1.666	1.24515	1.24515	Litaf	SPP1		SPP1
1367581_a_at	0.0052103	0.0052103	4.31	-1.6837	1.75695	1.75695	Spp1	REEP4		REEP4
1389073_at	0.0052288	0.0052288	4.31	-1.6869	0.572693	0.572693	Reep4	IQGAP1		IQGAP1
1388762_at	0.0052774	0.0052774	4.3	-1.6954	0.803617	0.803617	Iqgap1	SMARCB1		SMARCB1
1371914_at	0.0053461	0.0053461	4.29	-1.7072	0.863811	0.863811	Smarcb1	CDC123		CDC123
1388105_at	0.005348	0.005348	4.29	-1.7075	0.978003	0.978003	Cdc123	LIG3		LIG3
1392807_at	0.0053829	0.0053829	4.28	-1.7135	0.677862	0.677862	Lig3	GALK1		GALK1
1389248_at	0.0053942	0.0053942	4.28	-1.7154	2.7177	2.7177	Galk1	PDLIM7		PDLIM7
1370347_at	0.0055284	0.0055284	4.26	-1.7379	1.28669	1.28669	Pdlim7	RHOA		RHOA
1399027_at	0.0055302	0.0055302	4.26	-1.7382	0.951144	0.951144	Rhoa	ST3GAL4		ST3GAL4
1373224_at	0.0056304	0.0056304	4.24	-1.7547	2.60933	2.60933	St3gal4	PRIM2		PRIM2
1388911_at	0.0056692	0.0056692	4.23	-1.7609	1.72718	1.72718	Prim2	POSTN		POSTN
1373911_at	0.0056948	0.0056948	4.23	-1.7651	1.19704	1.19704	Postn	TYMS		TYMS
1369499_at	0.0057547	0.0057547	4.22	-1.7747	2.19508	2.19508	Tyms	RGS16		RGS16
1373777_at	0.0057642	0.0057642	4.22	-1.7762	1.28703	1.28703	Rgs16	SELL		SELL
1369801_at	0.0057671	0.0057671	4.22	-1.7767	0.893861	0.893861	Sell	COL1A1		COL1A1
1388116_at	0.0058211	0.0058211	4.21	-1.7852	0.968454	0.968454	Col1a1	PF4		PF4
1371250_at	0.0058422	0.0058422	4.21	-1.7885	0.947713	0.947713	Pf4	S100A9		S100A9
1387125_at	0.005855	0.005855	4.21	-1.7905	1.42369	1.42369	S100a9	TUBB6		TUBB6
1376100_at	0.0058586	0.0058586	4.2	-1.7911	1.74316	1.74316	Tubb6	CDCA3		CDCA3
1374449_at	0.0058702	0.0058702	4.2	-1.7929	1.14903	1.14903	Cdca3	CTSL		CTSL
1370245_at	0.0058892	0.0058892	4.2	-1.7959	0.81117	0.81117	Ctsl	WDPCP		WDPCP
1386143_at	0.005928	0.005928	4.19	-1.8019	0.650446	0.650446	Wdpcp	LCP2		LCP2
1390797_at	0.005939	0.005939	4.19	-1.8036	2.02364	2.02364	Lcp2	COMMD7		COMMD7
1377126_at	0.0059531	0.0059531	4.19	-1.8058	0.806825	0.806825	Commd7	LASP1		LASP1
1387844_at	0.0060129	0.0060129	4.18	-1.815	0.834496	0.834496	Lasp1	MFAP5		MFAP5
1373674_at	0.0060468	0.0060468	4.18	-1.8202	0.999506	0.999506	Mfap5	SFRP2		SFRP2
1390119_at	0.0060705	0.0060705	4.17	-1.8238	1.02719	1.02719	Sfrp2	FSTL1		FSTL1
1368822_at	0.0061257	0.0061257	4.16	-1.8321	0.826406	0.826406	Fstl1	STK17B		STK17B
1387502_at	0.0061798	0.0061798	4.16	-1.8402	0.762865	0.762865	Stk17b	VCAN		VCAN
1388142_at	0.0062068	0.0062068	4.15	-1.8442	1.08601	1.08601	Vcan	NPDC1		NPDC1
1372773_at	0.006389	0.006389	4.13	-1.8709	0.598373	0.598373	Npdc1	KIF22		KIF22
1372516_at	0.0063907	0.0063907	4.13	-1.8711	1.28612	1.28612	Kif22	SSR2		SSR2
1373185_at	0.0063993	0.0063993	4.12	-1.8723	0.737268	0.737268	Ssr2	ARPC5		ARPC5
1390022_at	0.0064605	0.0064605	4.12	-1.8811	0.830585	0.830585	Arpc5	PTPRCAP		PTPRCAP
1372852_at	0.0064837	0.0064837	4.11	-1.8844	1.36636	1.36636	Ptprcap	ACAT2		ACAT2
1372462_at	0.0064885	0.0064885	4.11	-1.8851	0.892243	0.892243	Acat2	SRC		SRC
1389030_a_at	0.006629	0.006629	4.09	-1.9049	1.55802	1.55802	Src	POU3F1		POU3F1
1370432_at	0.0066927	0.0066927	4.08	-1.9137	0.747891	0.747891	Pou3f1	GM2A		GM2A
1371803_at	0.0066932	0.0066932	4.08	-1.9138	1.02375	1.02375	Gm2a	AKR1B8		AKR1B8
1370902_at	0.0067525	0.0067525	4.08	-1.9219	1.49561	1.49561	Akr1b8	P3H1		P3H1
1367967_at	0.0068138	0.0068138	4.07	-1.9303	0.755202	0.755202	P3h1	S100A10		S100A10
1386890_at	0.0068727	0.0068727	4.06	-1.9382	0.705949	0.705949	S100a10	FXYD2		FXYD2
1387799_at	0.006951	0.006951	4.05	-1.9487	1.23731	1.23731	Fxyd2	GPR176		GPR176
1388243_at	0.0069717	0.0069717	4.05	-1.9515	0.658124	0.658124	Gpr176	TIMP1		TIMP1
1367712_at	0.0069826	0.0069826	4.05	-1.9529	1.35305	1.35305	Timp1	PCP4		PCP4
1368145_at	0.0069915	0.0069915	4.04	-1.9541	1.71592	1.71592	Pcp4	FAM129B		FAM129B
1388482_at	0.0070031	0.0070031	4.04	-1.9556	1.05914	1.05914	Fam129b	GBA		GBA
1373491_at	0.0070251	0.0070251	4.04	-1.9585	0.654196	0.654196	Gba	TP53		TP53
1367831_at	0.00703	0.00703	4.04	-1.9592	0.603505	0.603505	Tp53	CHRNA5		CHRNA5
1369019_at	0.0070866	0.0070866	4.03	-1.9666	1.5648	1.5648	Chrna5	MILR1		MILR1
1368610_at	0.0071038	0.0071038	4.03	-1.9688	1.28639	1.28639	Milr1	SDC4		SDC4
1367721_at	0.0072041	0.0072041	4.02	-1.9818	0.911081	0.911081	Sdc4	CTSS		CTSS
1387005_at	0.0072053	0.0072053	4.02	-1.982	1.35014	1.35014	Ctss	TMOD2		TMOD2
1390482_at	0.007214	0.007214	4.02	-1.9831	2.06309	2.06309	Tmod2	PHGDH		PHGDH
1367811_at	0.0072145	0.0072145	4.02	-1.9832	0.765292	0.765292	Phgdh	CLEC4A3		CLEC4A3
1389553_at	0.0072644	0.0072644	4.01	-1.9895	1.6583	1.6583	Clec4a3	LIMA1		LIMA1
1376700_at	0.0074072	0.0074072	3.99	-2.0076	0.711262	0.711262	Lima1	MYOF		MYOF
1375857_at	0.0074135	0.0074135	3.99	-2.0084	0.940015	0.940015	Myof	PRELID1		PRELID1
1371620_at	0.0074203	0.0074203	3.99	-2.0092	1.10347	1.10347	Prelid1	AHCY		AHCY
1367798_at	0.0074583	0.0074583	3.99	-2.014	0.631995	0.631995	Ahcy	PTPRC		PTPRC
1390798_at	0.0075014	0.0075014	3.98	-2.0193	1.25414	1.25414	Ptprc	CAPG		CAPG
1388460_at	0.0075115	0.0075115	3.98	-2.0205	0.985353	0.985353	Capg	TCF19		TCF19
1389555_at	0.0075146	0.0075146	3.98	-2.0209	1.19254	1.19254	Tcf19	COTL1		COTL1
1388596_at	0.0075178	0.0075178	3.98	-2.0213	1.58848	1.58848	Cotl1	C1QTNF6		C1QTNF6
1372410_at	0.0075453	0.0075453	3.98	-2.0247	0.788401	0.788401	C1qtnf6	PHF19		PHF19
1374354_at	0.0075497	0.0075497	3.98	-2.0253	1.96681	1.96681	Phf19	TMEM37		TMEM37
1388103_at	0.0075638	0.0075638	3.98	-2.027	1.08518	1.08518	Tmem37	CD44		CD44
1387952_a_at	0.0075943	0.0075943	3.97	-2.0307	0.858764	0.858764	Cd44	SERP1		SERP1
1386900_at	0.0076328	0.0076328	3.97	-2.0354	1.06851	1.06851	Serp1	CRYBB2		CRYBB2
1367684_at	0.0076801	0.0076801	3.96	-2.0412	1.5957	1.5957	Crybb2	ADCYAP1R1		ADCYAP1R1
1368730_a_at	0.0077001	0.0077001	3.96	-2.0436	1.06215	1.06215	Adcyap1r1	MSN		MSN
1371575_at	0.0077949	0.0077949	3.95	-2.0549	0.905109	0.905109	Msn	IGSF6		IGSF6
1387687_at	0.0078048	0.0078048	3.95	-2.0561	1.01337	1.01337	Igsf6	LMF2		LMF2
1389209_at	0.0078592	0.0078592	3.94	-2.0626	0.606165	0.606165	Lmf2	FCNB		FCNB
1387378_at	0.0080234	0.0080234	3.92	-2.0818	1.60367	1.60367	Fcnb	COL8A1		COL8A1
1393891_at	0.0080655	0.0080655	3.92	-2.0867	1.02699	1.02699	Col8a1	CCL6		CCL6
1389123_at	0.0080657	0.0080657	3.92	-2.0867	1.23602	1.23602	Ccl6	SH3BGRL3		SH3BGRL3
1371487_at	0.0080827	0.0080827	3.92	-2.0886	0.870886	0.870886	Sh3bgrl3	ATP6V1B2		ATP6V1B2
1387664_at	0.0081159	0.0081159	3.91	-2.0925	0.648666	0.648666	Atp6v1b2	GNB1		GNB1
1367732_at	0.0081747	0.0081747	3.91	-2.0992	0.686867	0.686867	Gnb1	PRAF2		PRAF2
1372931_at	0.0082699	0.0082699	3.9	-2.1099	0.822172	0.822172	Praf2	SLC7A8		SLC7A8
1387057_at	0.0082756	0.0082756	3.9	-2.1106	2.88694	2.88694	Slc7a8	GABRA6		GABRA6
1369861_at	0.0083202	0.0083202	3.89	-2.1156	1.67883	1.67883	Gabra6	CSF1R		CSF1R
1388784_at	0.0083614	0.0083614	3.89	-2.1202	0.862015	0.862015	Csf1r	HN1L		HN1L
1373447_at	0.0083783	0.0083783	3.89	-2.1221	0.841759	0.841759	Hn1l	ASB9		ASB9
1384283_at	0.008379	0.008379	3.88	-2.1222	1.18118	1.18118	Asb9	FGR		FGR
1368693_at	0.0084368	0.0084368	3.88	-2.1286	1.3787	1.3787	Fgr	HCK		HCK
1369204_at	0.0084647	0.0084647	3.88	-2.1316	1.23002	1.23002	Hck	HIP1		HIP1
1392941_at	0.0084823	0.0084823	3.87	-2.1336	0.751331	0.751331	Hip1	GLMP		GLMP
1371946_at	0.0085303	0.0085303	3.87	-2.1388	0.974125	0.974125	Glmp	NOC2L		NOC2L
1389983_at	0.0085674	0.0085674	3.87	-2.1429	0.689034	0.689034	Noc2l	CNOT4		CNOT4
1373190_at	0.0085812	0.0085812	3.86	-2.1444	0.557615	0.557615	Cnot4	MYD88		MYD88
1374468_at	0.008665	0.008665	3.86	-2.1534	0.57156	0.57156	Myd88	MCRS1		MCRS1
1372413_at	0.0086943	0.0086943	3.85	-2.1566	0.544474	0.544474	Mcrs1	MCM4		MCM4
1373557_at	0.0087612	0.0087612	3.85	-2.1637	1.08426	1.08426	Mcm4	ARPC3		ARPC3
1371977_at	0.0088594	0.0088594	3.84	-2.1741	0.892396	0.892396	Arpc3	EVI2A		EVI2A
1389413_at	0.0088765	0.0088765	3.83	-2.1759	1.09094	1.09094	Evi2a	GTPBP4		GTPBP4
1372869_at	0.0089196	0.0089196	3.83	-2.1805	0.55085	0.55085	Gtpbp4	CCR2		CCR2
1387742_at	0.0089491	0.0089491	3.83	-2.1835	0.91813	0.91813	Ccr2	TTC9		TTC9
1376013_at	0.0089668	0.0089668	3.83	-2.1854	1.49532	1.49532	Ttc9	NADK		NADK
1371559_at	0.0089733	0.0089733	3.83	-2.1861	0.60518	0.60518	Nadk	FOXC1		FOXC1
1389877_at	0.0090029	0.0090029	3.82	-2.1891	0.728674	0.728674	Foxc1	FAM212A		FAM212A
1372622_at	0.0090104	0.0090104	3.82	-2.1899	0.96787	0.96787	Fam212a	ATP1B3		ATP1B3
1398300_at	0.0090696	0.0090696	3.82	-2.196	0.657745	0.657745	Atp1b3	TNFAIP6		TNFAIP6
1371194_at	0.0091001	0.0091001	3.81	-2.1992	1.31789	1.31789	Tnfaip6	TMEM229B		TMEM229B
1377185_at	0.0091197	0.0091197	3.81	-2.2012	2.01009	2.01009	Tmem229b	GPR161		GPR161
1384546_at	0.0092263	0.0092263	3.8	-2.212	1.04537	1.04537	Gpr161	PLXNB2		PLXNB2
1371411_at	0.0092465	0.0092465	3.8	-2.2141	0.833468	0.833468	Plxnb2	ANXA1		ANXA1
1367614_at	0.009368	0.009368	3.79	-2.2263	0.735675	0.735675	Anxa1	EDEM2		EDEM2
1376315_at	0.0094163	0.0094163	3.78	-2.2311	0.694001	0.694001	Edem2	PLEK		PLEK
1390687_at	0.0094605	0.0094605	3.78	-2.2355	2.94549	2.94549	Plek	ADSS		ADSS
1399050_at	0.0094651	0.0094651	3.78	-2.2359	1.03154	1.03154	Adss	RAP1B		RAP1B
1387806_at	0.0096004	0.0096004	3.77	-2.2492	0.857471	0.857471	Rap1b	PXDN		PXDN
1372294_at	0.0096203	0.0096203	3.77	-2.2511	0.535454	0.535454	Pxdn	RASSF5		RASSF5
1370415_at	0.0096366	0.0096366	3.76	-2.2527	0.73703	0.73703	Rassf5	LYZ2		LYZ2
1370154_at	0.0097043	0.0097043	3.76	-2.2593	0.84216	0.84216	Lyz2	SMPDL3A		SMPDL3A
1388809_at	0.0098411	0.0098411	3.75	-2.2724	0.959514	0.959514	Smpdl3a	SBF1		SBF1
1390143_at	0.0098804	0.0098804	3.74	-2.2761	1.94359	1.94359	Sbf1	HSD17B12		HSD17B12
1368051_at	0.0099215	0.0099215	3.74	-2.28	0.582291	0.582291	Hsd17b12	MELK		MELK
1389756_at	0.0099484	0.0099484	3.74	-2.2825	1.14365	1.14365	Melk	CDC20		CDC20
1370294_a_at	0.009955	0.009955	3.74	-2.2832	0.920929	0.920929	Cdc20	HTATIP2		HTATIP2
1390208_at	0.0100157	0.0100157	3.73	-2.2889	0.574304	0.574304	Htatip2	MARS		MARS
1389733_at	0.0100242	0.0100242	3.73	-2.2897	0.642105	0.642105	Mars	ARHGAP30		ARHGAP30
1392407_at	0.0101186	0.0101186	3.72	-2.2984	0.772452	0.772452	Arhgap30	INO80C		INO80C
1389302_at	0.0101489	0.0101489	3.72	-2.3012	0.513851	0.513851	Ino80c	OGFR		OGFR
1386986_at	0.0102324	0.0102324	3.71	-2.3089	1.19203	1.19203	Ogfr	RGS10		RGS10
1390707_at	0.0102495	0.0102495	3.71	-2.3105	0.857243	0.857243	Rgs10	LRRC59		LRRC59
1371445_at	0.0103007	0.0103007	3.71	-2.3152	0.784075	0.784075	Lrrc59	TUBB5		TUBB5
1370290_at	0.0103137	0.0103137	3.71	-2.3163	0.788883	0.788883	Tubb5	SPC24		SPC24
1373026_at	0.0103148	0.0103148	3.71	-2.3164	1.45433	1.45433	Spc24	PLK1		PLK1
1370297_at	0.0103447	0.0103447	3.7	-2.3192	0.912827	0.912827	Plk1	ICOS		ICOS
1368783_at	0.0103735	0.0103735	3.7	-2.3218	0.857128	0.857128	Icos	ZMYM3		ZMYM3
1380517_at	0.0103936	0.0103936	3.7	-2.3236	1.72692	1.72692	Zmym3	CAMLG		CAMLG
1387086_at	0.0104654	0.0104654	3.69	-2.33	0.631219	0.631219	Camlg	FOSL1		FOSL1
1368489_at	0.0104841	0.0104841	3.69	-2.3317	0.79313	0.79313	Fosl1	GNB4		GNB4
1371071_at	0.0105906	0.0105906	3.68	-2.3412	0.935564	0.935564	Gnb4	SFXN1		SFXN1
1372715_at	0.0107426	0.0107426	3.67	-2.3546	0.638178	0.638178	Sfxn1	S100A4		S100A4
1367846_at	0.0107528	0.0107528	3.67	-2.3555	1.00398	1.00398	S100a4	PEMT		PEMT
1369581_at	0.0107647	0.0107647	3.67	-2.3565	0.948195	0.948195	Pemt	HNRNPA1		HNRNPA1
1375612_at	0.0109007	0.0109007	3.66	-2.3683	0.52055	0.52055	Hnrnpa1	RNF4		RNF4
1388089_a_at	0.0109155	0.0109155	3.66	-2.3696	0.510673	0.510673	Rnf4	CHAF1A		CHAF1A
1373489_at	0.0110009	0.0110009	3.65	-2.3769	1.60213	1.60213	Chaf1a	CTGF		CTGF
1367631_at	0.0110257	0.0110257	3.65	-2.379	0.803601	0.803601	Ctgf	PQLC2		PQLC2
1377179_at	0.0111562	0.0111562	3.64	-2.3901	0.856616	0.856616	Pqlc2	PABPC1		PABPC1
1369952_at	0.0111595	0.0111595	3.64	-2.3903	0.623146	0.623146	Pabpc1	MCM6		MCM6
1371074_a_at	0.0113233	0.0113233	3.63	-2.404	1.3609	1.3609	Mcm6	CBLB		CBLB
1371027_at	0.0114763	0.0114763	3.61	-2.4166	0.607501	0.607501	Cblb	MOB3A		MOB3A
1372904_at	0.0115286	0.0115286	3.61	-2.4209	0.538326	0.538326	Mob3a	PA2G4		PA2G4
1388353_at	0.0115734	0.0115734	3.61	-2.4246	0.530574	0.530574	Pa2g4	SPINT2		SPINT2
1388320_at	0.0116475	0.0116475	3.6	-2.4306	1.25476	1.25476	Spint2	FXYD5		FXYD5
1368207_at	0.0116669	0.0116669	3.6	-2.4321	1.13233	1.13233	Fxyd5	GABRA3		GABRA3
1369844_at	0.0117981	0.0117981	3.59	-2.4427	1.18095	1.18095	Gabra3	APBB1IP		APBB1IP
1377239_at	0.0119464	0.0119464	3.58	-2.4544	0.837731	0.837731	Apbb1ip	ERRFI1		ERRFI1
1373093_at	0.0121265	0.0121265	3.57	-2.4685	1.12241	1.12241	Errfi1	DRD1		DRD1
1368479_at	0.012136	0.012136	3.57	-2.4693	0.969692	0.969692	Drd1	LOX		LOX
1368172_a_at	0.0121367	0.0121367	3.57	-2.4693	1.39783	1.39783	Lox	PTPRO		PTPRO
1368412_a_at	0.0121397	0.0121397	3.57	-2.4695	0.831461	0.831461	Ptpro	CDKN3		CDKN3
1372685_at	0.0121418	0.0121418	3.57	-2.4697	1.2677	1.2677	Cdkn3	TCEB3		TCEB3
1389778_a_at	0.012169	0.012169	3.57	-2.4718	0.730687	0.730687	Tceb3	RNH1		RNH1
1370880_at	0.0121759	0.0121759	3.56	-2.4724	0.953874	0.953874	Rnh1	SCAMP2		SCAMP2
1371090_at	0.0122136	0.0122136	3.56	-2.4753	0.566371	0.566371	Scamp2	ACTR2		ACTR2
1389904_at	0.0122375	0.0122375	3.56	-2.4771	0.607128	0.607128	Actr2	CTRC		CTRC
1384778_at	0.0122996	0.0122996	3.56	-2.4819	0.56747	0.56747	Ctrc	ZFP518B		ZFP518B
1373583_at	0.0123112	0.0123112	3.56	-2.4828	0.799633	0.799633	Zfp518b	CCL4		CCL4
1370832_at	0.0123643	0.0123643	3.55	-2.4868	0.607084	0.607084	Ccl4	PTER		PTER
1387851_at	0.0123719	0.0123719	3.55	-2.4874	0.905544	0.905544	Pter	RAC2		RAC2
1372404_at	0.0123944	0.0123944	3.55	-2.4891	0.990056	0.990056	Rac2	IKBIP		IKBIP
1376689_at	0.0125383	0.0125383	3.54	-2.5	0.674513	0.674513	Ikbip	GAR1		GAR1
1374857_at	0.0125427	0.0125427	3.54	-2.5003	2.18719	2.18719	Gar1	TK1		TK1
1389858_at	0.0125711	0.0125711	3.54	-2.5025	0.515714	0.515714	Tk1	BAZ1A		BAZ1A
1374113_at	0.0126776	0.0126776	3.53	-2.5104	0.70837	0.70837	Baz1a	MPG		MPG
1368410_at	0.0126809	0.0126809	3.53	-2.5107	0.776703	0.776703	Mpg	NECAP2		NECAP2
1372082_at	0.0126999	0.0126999	3.53	-2.5121	0.893414	0.893414	Necap2	SEC23B		SEC23B
1388857_at	0.0127432	0.0127432	3.53	-2.5153	0.945657	0.945657	Sec23b	TRAM1		TRAM1
1371688_at	0.012811	0.012811	3.52	-2.5203	0.673685	0.673685	Tram1	CTSB		CTSB
1367646_at	0.012826	0.012826	3.52	-2.5214	0.602534	0.602534	Ctsb	CMTM7		CMTM7
1372478_at	0.012845	0.012845	3.52	-2.5228	1.05436	1.05436	Cmtm7	ADAMTS1		ADAMTS1
1368223_at	0.0129111	0.0129111	3.52	-2.5276	0.779105	0.779105	Adamts1	DUSP6		DUSP6
1387024_at	0.0130075	0.0130075	3.51	-2.5346	1.08705	1.08705	Dusp6	DERL2		DERL2
1376437_at	0.0130222	0.0130222	3.51	-2.5357	0.50703	0.50703	Derl2	ARHGDIB		ARHGDIB
1373881_at	0.0130555	0.0130555	3.51	-2.5381	0.687369	0.687369	Arhgdib	DNAJC3		DNAJC3
1370073_at	0.0131888	0.0131888	3.5	-2.5477	1.04581	1.04581	Dnajc3	APOE		APOE
1370862_at	0.0132363	0.0132363	3.5	-2.5511	0.980347	0.980347	Apoe	CEBPA		CEBPA
1369658_at	0.0133424	0.0133424	3.49	-2.5586	1.81827	1.81827	Cebpa	ACTG1		ACTG1
1371327_a_at	0.0133661	0.0133661	3.49	-2.5603	0.513484	0.513484	Actg1	VSIR		VSIR
1374544_at	0.0133731	0.0133731	3.49	-2.5608	1.06094	1.06094	Vsir	PGLYRP1		PGLYRP1
1387422_at	0.0134033	0.0134033	3.48	-2.5629	1.75658	1.75658	Pglyrp1	SLCO2A1		SLCO2A1
1372889_at	0.0134716	0.0134716	3.48	-2.5677	0.985884	0.985884	Slco2a1	SLC25A48		SLC25A48
1389678_at	0.0135143	0.0135143	3.48	-2.5707	1.15401	1.15401	Slc25a48	MAPRE1		MAPRE1
1373397_at	0.0135175	0.0135175	3.48	-2.5709	0.611276	0.611276	Mapre1	CNTN5		CNTN5
1369366_at	0.0135201	0.0135201	3.48	-2.5711	1.77666	1.77666	Cntn5	CNIH4		CNIH4
1389980_at	0.0135652	0.0135652	3.47	-2.5743	0.69563	0.69563	Cnih4	XPO1		XPO1
1388150_at	0.0135982	0.0135982	3.47	-2.5766	0.82926	0.82926	Xpo1	RHNO1		RHNO1
1376701_a_at	0.0136897	0.0136897	3.47	-2.5829	0.539052	0.539052	Rhno1	MCAM		MCAM
1374933_at	0.0136933	0.0136933	3.47	-2.5832	0.89668	0.89668	Mcam	CERS4		CERS4
1389741_at	0.0137079	0.0137079	3.47	-2.5842	1.92094	1.92094	Cers4	RACGAP1		RACGAP1
1373658_at	0.0137534	0.0137534	3.46	-2.5873	0.991542	0.991542	Racgap1	GMFG		GMFG
1373490_at	0.0138336	0.0138336	3.46	-2.5928	1.16806	1.16806	Gmfg	METRNL		METRNL
1389911_at	0.0138969	0.0138969	3.45	-2.5971	1.10612	1.10612	Metrnl	NR2F2		NR2F2
1389554_at	0.0139204	0.0139204	3.45	-2.5987	0.878733	0.878733	Nr2f2	MS4A6A		MS4A6A
1376390_at	0.0140176	0.0140176	3.45	-2.6053	0.883049	0.883049	Ms4a6a	RAC1		RAC1
1372513_at	0.0140335	0.0140335	3.45	-2.6064	0.60127	0.60127	Rac1	NXN		NXN
1375980_at	0.0140966	0.0140966	3.44	-2.6106	0.518773	0.518773	Nxn	SIN3B		SIN3B
1371521_at	0.014101	0.014101	3.44	-2.6109	0.540349	0.540349	Sin3b	LMNB1		LMNB1
1373897_at	0.0141269	0.0141269	3.44	-2.6126	0.808855	0.808855	Lmnb1	HHEX		HHEX
1387270_at	0.0141358	0.0141358	3.44	-2.6132	0.881379	0.881379	Hhex	JUNB		JUNB
1387788_at	0.0141745	0.0141745	3.44	-2.6158	0.526749	0.526749	Junb	CCSAP		CCSAP
1377201_at	0.0143029	0.0143029	3.43	-2.6243	0.719846	0.719846	Ccsap	VAT1		VAT1
1371432_at	0.0143405	0.0143405	3.43	-2.6268	1.0815	1.0815	Vat1	APPL1		APPL1
1389539_at	0.0143467	0.0143467	3.43	-2.6272	0.517116	0.517116	Appl1	CFP		CFP
1393411_at	0.0143604	0.0143604	3.43	-2.6281	2.49757	2.49757	Cfp	ALYREF		ALYREF
1374897_at	0.0143794	0.0143794	3.43	-2.6294	0.819243	0.819243	Alyref	SEC61A1		SEC61A1
1371368_at	0.0144503	0.0144503	3.42	-2.634	0.984111	0.984111	Sec61a1	STK10		STK10
1367936_at	0.0144706	0.0144706	3.42	-2.6353	0.859015	0.859015	Stk10	HM13		HM13
1389902_at	0.0145236	0.0145236	3.42	-2.6388	0.574596	0.574596	Hm13	FBXL6		FBXL6
1389078_at	0.0145369	0.0145369	3.42	-2.6397	0.569	0.569	Fbxl6	TMBIM1		TMBIM1
1376102_at	0.0146217	0.0146217	3.41	-2.6452	0.770356	0.770356	Tmbim1	EGR1		EGR1
1368321_at	0.0146433	0.0146433	3.41	-2.6466	0.979422	0.979422	Egr1	POU1F1		POU1F1
1369762_at	0.0147836	0.0147836	3.4	-2.6556	1.10023	1.10023	Pou1f1	FOLR2		FOLR2
1390348_at	0.0147958	0.0147958	3.4	-2.6564	0.820492	0.820492	Folr2	FPGS		FPGS
1389380_at	0.014879	0.014879	3.4	-2.6617	0.716848	0.716848	Fpgs	RRP1		RRP1
1372932_at	0.0149075	0.0149075	3.4	-2.6635	0.697354	0.697354	Rrp1	ACD		ACD
1372429_at	0.0149187	0.0149187	3.4	-2.6642	0.641507	0.641507	Acd	LAPTM5		LAPTM5
1368006_at	0.014928	0.014928	3.4	-2.6648	1.01578	1.01578	Laptm5	KLF13		KLF13
1383013_at	0.0149483	0.0149483	3.39	-2.6661	0.555166	0.555166	Klf13	PALB2		PALB2
1376695_at	0.0149588	0.0149588	3.39	-2.6667	0.839634	0.839634	Palb2	TMEM123		TMEM123
1388930_at	0.0151067	0.0151067	3.39	-2.6761	0.673633	0.673633	Tmem123	COL18A1		COL18A1
1388459_at	0.0152208	0.0152208	3.38	-2.6832	0.897156	0.897156	Col18a1	KNSTRN		KNSTRN
1390137_at	0.0152424	0.0152424	3.38	-2.6845	1.35428	1.35428	Knstrn	IFNAR1		IFNAR1
1375696_at	0.0152759	0.0152759	3.38	-2.6866	0.545689	0.545689	Ifnar1	PNP		PNP
1388337_at	0.0152821	0.0152821	3.38	-2.687	0.707817	0.707817	Pnp	RBM14		RBM14
1374844_at	0.0154054	0.0154054	3.37	-2.6946	0.766909	0.766909	Rbm14	TMEM167A		TMEM167A
1376272_s_at	0.0154802	0.0154802	3.37	-2.6992	0.630859	0.630859	Tmem167a	DYNLT1		DYNLT1
1386882_at	0.0155355	0.0155355	3.36	-2.7026	0.800134	0.800134	Dynlt1	UBE2C		UBE2C
1388484_at	0.0156571	0.0156571	3.36	-2.7099	0.98843	0.98843	Ube2c	P2RY6		P2RY6
1368754_at	0.0157773	0.0157773	3.35	-2.7172	0.835337	0.835337	P2ry6	S100A6		S100A6
1367661_at	0.0157793	0.0157793	3.35	-2.7173	0.677017	0.677017	S100a6	GDPD5		GDPD5
1377356_at	0.0158553	0.0158553	3.35	-2.7219	0.802439	0.802439	Gdpd5	CAP1		CAP1
1368808_at	0.0159092	0.0159092	3.34	-2.7251	0.8486	0.8486	Cap1	HNRNPA3		HNRNPA3
1370871_at	0.015911	0.015911	3.34	-2.7252	0.694697	0.694697	Hnrnpa3	PLAUR		PLAUR
1387269_s_at	0.0159596	0.0159596	3.34	-2.7281	2.46935	2.46935	Plaur	IL4R		IL4R
1368134_a_at	0.01601	0.01601	3.34	-2.7311	0.527269	0.527269	Il4r	BMP2		BMP2
1398270_at	0.0160219	0.0160219	3.34	-2.7318	0.623027	0.623027	Bmp2	OLR1		OLR1
1368683_at	0.0162095	0.0162095	3.33	-2.7428	2.11661	2.11661	Olr1	SERPINB9		SERPINB9
1373672_at	0.016243	0.016243	3.33	-2.7448	0.684118	0.684118	Serpinb9	SENP1		SENP1
1373522_at	0.0162615	0.0162615	3.33	-2.7458	0.66465	0.66465	Senp1	SNX2		SNX2
1374401_at	0.0162639	0.0162639	3.33	-2.746	0.921087	0.921087	Snx2	PIK3R2		PIK3R2
1376190_at	0.0163493	0.0163493	3.32	-2.7509	0.723345	0.723345	Pik3r2	PDIA4		PDIA4
1370007_at	0.0163887	0.0163887	3.32	-2.7532	0.943856	0.943856	Pdia4	IL24		IL24
1368210_at	0.0164842	0.0164842	3.32	-2.7587	0.652957	0.652957	Il24	LOC619574		LOC619574
1373831_at	0.016709	0.016709	3.3	-2.7716	0.931171	0.931171	LOC619574	GNG10		GNG10
1388455_at	0.0167471	0.0167471	3.3	-2.7737	0.801081	0.801081	Gng10	TFE3		TFE3
1389985_at	0.0167837	0.0167837	3.3	-2.7758	2.18201	2.18201	Tfe3	PLPP2		PLPP2
1388913_at	0.0167841	0.0167841	3.3	-2.7758	1.52627	1.52627	Plpp2	IFITM1		IFITM1
1372013_at	0.0168972	0.0168972	3.29	-2.7822	0.933022	0.933022	Ifitm1	TNFRSF1A		TNFRSF1A
1367715_at	0.0170238	0.0170238	3.29	-2.7893	0.640319	0.640319	Tnfrsf1a	PAIP1		PAIP1
1379335_at	0.0170911	0.0170911	3.29	-2.793	0.67336	0.67336	Paip1	ATF3		ATF3
1369268_at	0.0171239	0.0171239	3.28	-2.7949	2.00379	2.00379	Atf3	NCL		NCL
1398832_at	0.0172604	0.0172604	3.28	-2.8024	0.570635	0.570635	Ncl	CNN2		CNN2
1388763_at	0.0173498	0.0173498	3.27	-2.8073	0.728128	0.728128	Cnn2	HIF1A		HIF1A
1387076_at	0.0173888	0.0173888	3.27	-2.8094	0.757787	0.757787	Hif1a	PHF20		PHF20
1384019_a_at	0.0175223	0.0175223	3.27	-2.8167	0.874229	0.874229	Phf20	CR1L		CR1L
1387798_a_at	0.0175639	0.0175639	3.26	-2.8189	0.529359	0.529359	Cr1l	CD200		CD200
1369670_at	0.017677	0.017677	3.26	-2.825	0.504279	0.504279	Cd200	ATP13A2		ATP13A2
1373949_at	0.0177035	0.0177035	3.26	-2.8264	0.673539	0.673539	Atp13a2	FGA		FGA
1371258_at	0.0178133	0.0178133	3.25	-2.8323	1.25417	1.25417	Fga	PRR13		PRR13
1388408_at	0.0181139	0.0181139	3.24	-2.8482	0.704375	0.704375	Prr13	MPHOSPH10		MPHOSPH10
1375442_at	0.0181229	0.0181229	3.24	-2.8487	2.37142	2.37142	Mphosph10	CSRP1		CSRP1
1370057_at	0.0182285	0.0182285	3.23	-2.8542	0.541242	0.541242	Csrp1	CD38		CD38
1368975_at	0.0184637	0.0184637	3.22	-2.8664	0.817301	0.817301	Cd38	MSMB		MSMB
1387251_at	0.0185455	0.0185455	3.22	-2.8706	1.37998	1.37998	Msmb	NINJ1		NINJ1
1370348_at	0.0186211	0.0186211	3.22	-2.8744	0.568185	0.568185	Ninj1	MFSD14B		MFSD14B
1376793_at	0.0187169	0.0187169	3.21	-2.8793	0.866601	0.866601	Mfsd14b	EIF2S1		EIF2S1
1367713_at	0.0187279	0.0187279	3.21	-2.8799	0.519603	0.519603	Eif2s1	BRAT1		BRAT1
1390197_at	0.0187755	0.0187755	3.21	-2.8823	0.505337	0.505337	Brat1	PGF		PGF
1368919_at	0.0190526	0.0190526	3.2	-2.8962	1.21121	1.21121	Pgf	HOGA1		HOGA1
1390421_at	0.0190619	0.0190619	3.2	-2.8967	2.41895	2.41895	Hoga1	TRADD		TRADD
1390434_at	0.0190807	0.0190807	3.2	-2.8976	0.601841	0.601841	Tradd	ZFAND2A		ZFAND2A
1373767_at	0.0192096	0.0192096	3.19	-2.904	0.903545	0.903545	Zfand2a	MMP12		MMP12
1368530_at	0.0192915	0.0192915	3.19	-2.908	2.5114	2.5114	Mmp12	ICAM1		ICAM1
1387202_at	0.0192917	0.0192917	3.19	-2.908	1.13381	1.13381	Icam1	RBM47		RBM47
1376728_at	0.0193054	0.0193054	3.19	-2.9087	0.663371	0.663371	Rbm47	TPSAB1		TPSAB1
1387162_at	0.0195045	0.0195045	3.18	-2.9185	1.31649	1.31649	Tpsab1	ART2B		ART2B
1370629_at	0.0195599	0.0195599	3.18	-2.9212	0.94865	0.94865	Art2b	DEDD		DEDD
1369003_at	0.0196588	0.0196588	3.17	-2.926	1.45614	1.45614	Dedd	RAN		RAN
1367590_at	0.0196707	0.0196707	3.17	-2.9265	0.645874	0.645874	Ran	CADPS2		CADPS2
1390865_at	0.0196887	0.0196887	3.17	-2.9274	1.50453	1.50453	Cadps2	MAN2B1		MAN2B1
1388699_at	0.0197162	0.0197162	3.17	-2.9287	0.568588	0.568588	Man2b1	GAK		GAK
1367875_at	0.0197489	0.0197489	3.17	-2.9303	0.525263	0.525263	Gak	PIEZO1		PIEZO1
1376321_at	0.0197638	0.0197638	3.17	-2.931	0.782213	0.782213	Piezo1	RAB9A		RAB9A
1387186_at	0.0198704	0.0198704	3.16	-2.9361	0.590878	0.590878	Rab9a	CCR1		CCR1
1370083_at	0.0198749	0.0198749	3.16	-2.9364	1.11481	1.11481	Ccr1	HILPDA		HILPDA
1376076_at	0.0198803	0.0198803	3.16	-2.9366	0.584573	0.584573	Hilpda	EDEM1		EDEM1
1372533_at	0.0199698	0.0199698	3.16	-2.9409	1.17174	1.17174	Edem1	BRD2		BRD2
1389843_at	0.0199971	0.0199971	3.16	-2.9422	0.798539	0.798539	Brd2	EFHD2		EFHD2
1374388_at	0.0200337	0.0200337	3.16	-2.9439	0.802138	0.802138	Efhd2	TNF		TNF
1391384_at	0.020104	0.020104	3.16	-2.9473	1.96359	1.96359	Tnf	NANS		NANS
1372402_at	0.0203269	0.0203269	3.15	-2.9577	0.525422	0.525422	Nans	NHP2		NHP2
1371539_at	0.020357	0.020357	3.15	-2.9592	0.794407	0.794407	Nhp2	DNAAF1		DNAAF1
1382932_at	0.0205964	0.0205964	3.14	-2.9703	1.02992	1.02992	Dnaaf1	LPCAT1		LPCAT1
1371923_at	0.0205992	0.0205992	3.14	-2.9704	0.592048	0.592048	Lpcat1	SLC52A2		SLC52A2
1389451_at	0.0206373	0.0206373	3.13	-2.9722	0.919912	0.919912	Slc52a2	IFI35		IFI35
1374551_at	0.0206927	0.0206927	3.13	-2.9747	0.581687	0.581687	Ifi35	PGRMC1		PGRMC1
1367619_at	0.0208257	0.0208257	3.13	-2.9808	0.590816	0.590816	Pgrmc1	MAK16		MAK16
1377656_at	0.0208956	0.0208956	3.12	-2.984	0.823584	0.823584	Mak16	SLC39A7		SLC39A7
1389089_at	0.0209078	0.0209078	3.12	-2.9845	0.732266	0.732266	Slc39a7	SMS		SMS
1375889_at	0.0209264	0.0209264	3.12	-2.9854	0.787068	0.787068	Sms	MADD		MADD
1372580_at	0.0209598	0.0209598	3.12	-2.9869	0.722327	0.722327	Madd	COL1A2		COL1A2
1370155_at	0.0211211	0.0211211	3.12	-2.9942	0.818513	0.818513	Col1a2	C5AR1		C5AR1
1368742_at	0.0211405	0.0211405	3.12	-2.9951	0.808161	0.808161	C5ar1	INHBB		INHBB
1377163_at	0.0211547	0.0211547	3.11	-2.9957	0.745425	0.745425	Inhbb	MAF		MAF
1385243_at	0.0214264	0.0214264	3.1	-3.0079	0.850905	0.850905	Maf	IFRD1		IFRD1
1367795_at	0.0214316	0.0214316	3.1	-3.0081	0.660224	0.660224	Ifrd1	ABRACL		ABRACL
1383912_at	0.0215081	0.0215081	3.1	-3.0115	0.819128	0.819128	Abracl	DRAM2		DRAM2
1374518_at	0.0215514	0.0215514	3.1	-3.0134	0.593679	0.593679	Dram2	B4GALT6		B4GALT6
1387206_at	0.021658	0.021658	3.1	-3.0181	0.664629	0.664629	B4galt6	PYCR2		PYCR2
1373640_at	0.0216626	0.0216626	3.1	-3.0183	0.818692	0.818692	Pycr2	VMP1		VMP1
1370807_at	0.021699	0.021699	3.09	-3.0199	0.724601	0.724601	Vmp1	LOC100912851		LOC100912851
1376419_at	0.021706	0.021706	3.09	-3.0202	1.34382	1.34382	LOC100912851	MPEG1		MPEG1
1389006_at	0.0217818	0.0217818	3.09	-3.0235	1.32089	1.32089	Mpeg1	UBASH3B		UBASH3B
1373298_at	0.0217891	0.0217891	3.09	-3.0238	0.808405	0.808405	Ubash3b	SLC16A12		SLC16A12
1393516_at	0.021977	0.021977	3.08	-3.032	0.871204	0.871204	Slc16a12	CCR5		CCR5
1369290_at	0.022117	0.022117	3.08	-3.0381	0.887491	0.887491	Ccr5	GAS5		GAS5
1373499_at	0.0221815	0.0221815	3.08	-3.0408	0.616468	0.616468	Gas5	ARF4		ARF4
1398758_at	0.0222415	0.0222415	3.08	-3.0434	0.570004	0.570004	Arf4	RCE1		RCE1
1376949_at	0.0224381	0.0224381	3.07	-3.0518	0.716312	0.716312	Rce1	RPN1		RPN1
1398766_at	0.0225072	0.0225072	3.07	-3.0547	0.547101	0.547101	Rpn1	ADCY3		ADCY3
1387128_at	0.0225536	0.0225536	3.06	-3.0567	0.72614	0.72614	Adcy3	FCHSD2		FCHSD2
1389074_at	0.0226331	0.0226331	3.06	-3.06	0.608087	0.608087	Fchsd2	CDK4		CDK4
1369950_at	0.0226889	0.0226889	3.06	-3.0624	0.60309	0.60309	Cdk4	RGD1307235		RGD1307235
1375679_at	0.0228705	0.0228705	3.05	-3.0699	0.879474	0.879474	RGD1307235	NUCB2		NUCB2
1370000_at	0.0229551	0.0229551	3.05	-3.0735	0.627811	0.627811	Nucb2	PIP4K2A		PIP4K2A
1389109_at	0.0230441	0.0230441	3.05	-3.0771	0.712534	0.712534	Pip4k2a	TMEM8A		TMEM8A
1390292_at	0.0230617	0.0230617	3.05	-3.0779	0.754653	0.754653	Tmem8a	SKAP2		SKAP2
1369979_at	0.0230826	0.0230826	3.05	-3.0787	0.720311	0.720311	Skap2	CAR1		CAR1
1372374_at	0.0231484	0.0231484	3.04	-3.0814	2.16173	2.16173	Car1	GADD45B		GADD45B
1372016_at	0.0232899	0.0232899	3.04	-3.0873	0.619864	0.619864	Gadd45b	COL4A1		COL4A1
1373245_at	0.0233129	0.0233129	3.04	-3.0882	0.507652	0.507652	Col4a1	ASIC5		ASIC5
1369842_at	0.0234935	0.0234935	3.03	-3.0955	2.36412	2.36412	Asic5	ZFP36L2		ZFP36L2
1373106_at	0.023496	0.023496	3.03	-3.0956	0.627699	0.627699	Zfp36l2	SLC26A8		SLC26A8
1389747_at	0.0236018	0.0236018	3.03	-3.0999	0.542393	0.542393	Slc26a8	RIPK1		RIPK1
1371529_at	0.0236414	0.0236414	3.03	-3.1015	1.98423	1.98423	Ripk1	PLCG2		PLCG2
1387483_at	0.0237846	0.0237846	3.02	-3.1073	0.652368	0.652368	Plcg2	TOP2A		TOP2A
1372186_a_at	0.0238847	0.0238847	3.02	-3.1113	0.638696	0.638696	Top2a	TGFB2		TGFB2
1387172_a_at	0.0239223	0.0239223	3.02	-3.1128	0.630116	0.630116	Tgfb2	CCNB1		CCNB1
1370346_at	0.0241698	0.0241698	3.01	-3.1226	0.615357	0.615357	Ccnb1	IL17RA		IL17RA
1373611_at	0.0243141	0.0243141	3.01	-3.1282	0.749664	0.749664	Il17ra	TAGLN2		TAGLN2
1388335_at	0.0243428	0.0243428	3	-3.1294	0.519682	0.519682	Tagln2	PSCA		PSCA
1374345_at	0.0243515	0.0243515	3	-3.1297	2.24061	2.24061	Psca	CLEC11A		CLEC11A
1373914_at	0.0247324	0.0247324	2.99	-3.1445	0.584042	0.584042	Clec11a	TMED7		TMED7
1390152_at	0.0247357	0.0247357	2.99	-3.1446	0.628951	0.628951	Tmed7	RNF138		RNF138
1387201_at	0.0248305	0.0248305	2.99	-3.1483	0.761874	0.761874	Rnf138	RAB31		RAB31
1373894_at	0.0251177	0.0251177	2.98	-3.1592	0.552885	0.552885	Rab31	AIF1		AIF1
1368558_s_at	0.0252247	0.0252247	2.98	-3.1633	1.29391	1.29391	Aif1	HNRNPU		HNRNPU
1370170_at	0.0255769	0.0255769	2.97	-3.1765	0.544328	0.544328	Hnrnpu	PTBP3		PTBP3
1382005_at	0.02558	0.02558	2.97	-3.1766	0.608529	0.608529	Ptbp3	PTPRJ		PTPRJ
1368589_at	0.0256169	0.0256169	2.96	-3.178	1.19715	1.19715	Ptprj	HEBP1		HEBP1
1372004_at	0.0257802	0.0257802	2.96	-3.184	0.755222	0.755222	Hebp1	SPPL2B		SPPL2B
1374229_at	0.025853	0.025853	2.96	-3.1867	1.3484	1.3484	Sppl2b	OLR1867		OLR1867
1388081_at	0.0258646	0.0258646	2.96	-3.1871	1.29171	1.29171	Olr1867	44448		44448
1367698_a_at	0.0259544	0.0259544	2.95	-3.1904	0.583297	0.583297	2021-09-09	EGR2		EGR2
1387306_a_at	0.0260566	0.0260566	2.95	-3.1942	0.730481	0.730481	Egr2	NDFIP2		NDFIP2
1389364_at	0.0261746	0.0261746	2.95	-3.1985	0.543156	0.543156	Ndfip2	IL1RL1		IL1RL1
1370692_at	0.0261881	0.0261881	2.95	-3.199	1.67311	1.67311	Il1rl1	HAUS1		HAUS1
1370393_at	0.0264166	0.0264166	2.94	-3.2073	2.31922	2.31922	Haus1	NLN		NLN
1369669_at	0.0264193	0.0264193	2.94	-3.2074	0.955759	0.955759	Nln	COL5A1		COL5A1
1376099_at	0.0264358	0.0264358	2.94	-3.208	0.994871	0.994871	Col5a1	CAPRIN1		CAPRIN1
1371939_at	0.0265007	0.0265007	2.94	-3.2103	0.567497	0.567497	Caprin1	SCARB2		SCARB2
1368379_at	0.0267596	0.0267596	2.93	-3.2196	0.898273	0.898273	Scarb2	GEMIN4		GEMIN4
1374665_at	0.0267677	0.0267677	2.93	-3.2198	0.540315	0.540315	Gemin4	PLD4		PLD4
1373785_at	0.0269789	0.0269789	2.92	-3.2273	0.849008	0.849008	Pld4	RPS6KC1		RPS6KC1
1390689_at	0.0270782	0.0270782	2.92	-3.2308	0.621998	0.621998	Rps6kc1	ACSL5		ACSL5
1386926_at	0.0271154	0.0271154	2.92	-3.2321	0.652937	0.652937	Acsl5	TOMM40L		TOMM40L
1385473_x_at	0.0273488	0.0273488	2.91	-3.2403	1.78937	1.78937	Tomm40l	NAP1L1		NAP1L1
1371872_at	0.0274311	0.0274311	2.91	-3.2432	0.579801	0.579801	Nap1l1	RHOG		RHOG
1389227_at	0.027437	0.027437	2.91	-3.2434	0.525154	0.525154	Rhog	AQP4		AQP4
1368981_at	0.0275157	0.0275157	2.91	-3.2461	1.19009	1.19009	Aqp4	ECE1		ECE1
1367801_at	0.0275501	0.0275501	2.91	-3.2473	0.538352	0.538352	Ece1	UBIAD1		UBIAD1
1399076_at	0.0276374	0.0276374	2.91	-3.2503	0.711953	0.711953	Ubiad1	LHX1		LHX1
1377206_at	0.0278359	0.0278359	2.9	-3.2571	1.02906	1.02906	Lhx1	FGF7		FGF7
1369884_at	0.0280056	0.0280056	2.9	-3.2629	1.36579	1.36579	Fgf7	BCL9		BCL9
1388418_at	0.02814	0.02814	2.89	-3.2675	0.676964	0.676964	Bcl9	MED7		MED7
1377263_at	0.028176	0.028176	2.89	-3.2687	0.550678	0.550678	Med7	ATP6V1A		ATP6V1A
1382048_at	0.0282455	0.0282455	2.89	-3.2711	0.63758	0.63758	Atp6v1a	STK24		STK24
1374584_at	0.0282583	0.0282583	2.89	-3.2715	0.503959	0.503959	Stk24	LIMD2		LIMD2
1389885_at	0.0282733	0.0282733	2.89	-3.272	0.593226	0.593226	Limd2	METTL26		METTL26
1377524_at	0.0283027	0.0283027	2.89	-3.273	0.877323	0.877323	Mettl26	NOP58		NOP58
1368173_at	0.0283314	0.0283314	2.89	-3.2739	0.621834	0.621834	Nop58	PLD2		PLD2
1368954_at	0.0284242	0.0284242	2.88	-3.2771	1.05477	1.05477	Pld2	C3		C3
1368000_at	0.0284767	0.0284767	2.88	-3.2788	0.667055	0.667055	C3	LRGUK		LRGUK
1376439_at	0.0285196	0.0285196	2.88	-3.2803	1.22147	1.22147	Lrguk	KLF10		KLF10
1368650_at	0.0286565	0.0286565	2.88	-3.2848	1.06949	1.06949	Klf10	DIAPH3		DIAPH3
1376377_at	0.0286838	0.0286838	2.88	-3.2857	1.94827	1.94827	Diaph3	WSB1		WSB1
1374204_at	0.0287915	0.0287915	2.87	-3.2893	0.998832	0.998832	Wsb1	RT1-DA		RT1-DA
1370883_at	0.0287923	0.0287923	2.87	-3.2893	1.01885	1.01885	RT1-Da	TNFRSF12A		TNFRSF12A
1371785_at	0.0290952	0.0290952	2.87	-3.2993	0.878966	0.878966	Tnfrsf12a	ELK3		ELK3
1389617_at	0.0291006	0.0291006	2.87	-3.2995	0.637329	0.637329	Elk3	TRA2B		TRA2B
1370189_at	0.0291627	0.0291627	2.86	-3.3015	0.515759	0.515759	Tra2b	ASGR2		ASGR2
1368362_a_at	0.0292666	0.0292666	2.86	-3.3049	0.624043	0.624043	Asgr2	CLEC10A		CLEC10A
1368464_at	0.0292667	0.0292667	2.86	-3.3049	0.888611	0.888611	Clec10a	MX2		MX2
1387283_at	0.0292752	0.0292752	2.86	-3.3052	1.34838	1.34838	Mx2	ENPP3		ENPP3
1367905_at	0.0292788	0.0292788	2.86	-3.3053	0.898281	0.898281	Enpp3	LYL1		LYL1
1372321_at	0.0293569	0.0293569	2.86	-3.3078	1.87377	1.87377	Lyl1	YWHAZ		YWHAZ
1372249_at	0.0293671	0.0293671	2.86	-3.3082	0.574285	0.574285	Ywhaz	LOC100365921		LOC100365921
1398376_at	0.0295289	0.0295289	2.85	-3.3134	1.06884	1.06884	LOC100365921	MTFR1		MTFR1
1393239_at	0.0295375	0.0295375	2.85	-3.3137	0.573694	0.573694	Mtfr1	LYST		LYST
1369325_at	0.0296641	0.0296641	2.85	-3.3178	0.899183	0.899183	Lyst	CDR2		CDR2
1374139_at	0.0297359	0.0297359	2.85	-3.3201	0.968529	0.968529	Cdr2	ANP32E		ANP32E
1372620_at	0.0297384	0.0297384	2.85	-3.3201	0.841873	0.841873	Anp32e	RGS8		RGS8
1387403_at	0.0298743	0.0298743	2.85	-3.3245	1.77494	1.77494	Rgs8	TMEM121		TMEM121
1375799_at	0.0298896	0.0298896	2.85	-3.325	0.657192	0.657192	Tmem121	LYN		LYN
1368679_a_at	0.0298965	0.0298965	2.84	-3.3252	0.767702	0.767702	Lyn	RAB8A		RAB8A
1370001_at	0.0298971	0.0298971	2.84	-3.3252	0.501503	0.501503	Rab8a	TCN2		TCN2
1367765_at	0.0299664	0.0299664	2.84	-3.3274	0.551904	0.551904	Tcn2	LOC683071		LOC683071
1399061_at	0.0299871	0.0299871	2.84	-3.3281	0.555106	0.555106	LOC683071	FAM219B		FAM219B
1393062_at	0.0300196	0.0300196	2.84	-3.3291	1.04378	1.04378	Fam219b	MDFIC		MDFIC
1374752_at	0.0303692	0.0303692	2.83	-3.3401	0.532996	0.532996	Mdfic	CASC4		CASC4
1374081_at	0.0303846	0.0303846	2.83	-3.3406	0.639346	0.639346	Casc4	TRAF3IP2		TRAF3IP2
1374671_at	0.0303977	0.0303977	2.83	-3.341	1.03417	1.03417	Traf3ip2	CORO1C		CORO1C
1371632_at	0.0304718	0.0304718	2.83	-3.3434	0.803123	0.803123	Coro1c	PRDM4		PRDM4
1369236_at	0.0305302	0.0305302	2.83	-3.3452	0.526209	0.526209	Prdm4	IFI30		IFI30
1372070_at	0.0306735	0.0306735	2.83	-3.3496	0.546275	0.546275	Ifi30	GATM		GATM
1367627_at	0.0307151	0.0307151	2.82	-3.3509	0.514274	0.514274	Gatm	ARL11		ARL11
1378140_at	0.0307332	0.0307332	2.82	-3.3515	1.18241	1.18241	Arl11	NUP85		NUP85
1390650_at	0.0309195	0.0309195	2.82	-3.3573	0.80261	0.80261	Nup85	CD93		CD93
1368393_at	0.0309522	0.0309522	2.82	-3.3583	1.7668	1.7668	Cd93	DNASE2		DNASE2
1370443_at	0.0309887	0.0309887	2.82	-3.3594	0.946563	0.946563	Dnase2	FER		FER
1382672_a_at	0.0312588	0.0312588	2.81	-3.3677	1.61834	1.61834	Fer	EXOSC1		EXOSC1
1375432_at	0.0313779	0.0313779	2.81	-3.3713	0.508927	0.508927	Exosc1	DTX4		DTX4
1373114_at	0.0313902	0.0313902	2.81	-3.3717	0.544267	0.544267	Dtx4	RRM1		RRM1
1371862_at	0.0314194	0.0314194	2.81	-3.3725	0.59923	0.59923	Rrm1	FOXM1		FOXM1
1369018_at	0.0314696	0.0314696	2.81	-3.3741	1.71287	1.71287	Foxm1	SLC1A6		SLC1A6
1387161_at	0.0317471	0.0317471	2.8	-3.3824	1.52164	1.52164	Slc1a6	PDLIM5		PDLIM5
1368703_at	0.0318279	0.0318279	2.8	-3.3849	0.789172	0.789172	Pdlim5	P4HA1		P4HA1
1370954_at	0.0318338	0.0318338	2.8	-3.385	0.535387	0.535387	P4ha1	PRIM1		PRIM1
1388182_at	0.0319236	0.0319236	2.79	-3.3877	0.944799	0.944799	Prim1	CDCA4		CDCA4
1374739_at	0.032082	0.032082	2.79	-3.3924	0.643482	0.643482	Cdca4	DUSP14		DUSP14
1373324_at	0.0321266	0.0321266	2.79	-3.3938	0.606263	0.606263	Dusp14	ALDH18A1		ALDH18A1
1388521_at	0.0321444	0.0321444	2.79	-3.3943	0.60037	0.60037	Aldh18a1	MTPN		MTPN
1387785_at	0.032173	0.032173	2.79	-3.3951	0.504658	0.504658	Mtpn	LOC246267		LOC246267
1388098_at	0.0322053	0.0322053	2.79	-3.3961	0.619175	0.619175	LOC246267	SLC3A2		SLC3A2
1398771_at	0.032207	0.032207	2.79	-3.3961	0.598429	0.598429	Slc3a2	TSPAN2		TSPAN2
1368104_at	0.0322092	0.0322092	2.79	-3.3962	0.720377	0.720377	Tspan2	ACTA2		ACTA2
1370857_at	0.0324343	0.0324343	2.78	-3.4028	0.762102	0.762102	Acta2	CELA1		CELA1
1387819_at	0.0325228	0.0325228	2.78	-3.4054	0.908078	0.908078	Cela1	LYVE1		LYVE1
1382732_at	0.0326622	0.0326622	2.78	-3.4095	0.944286	0.944286	Lyve1	MAD2L1		MAD2L1
1376951_at	0.0326958	0.0326958	2.78	-3.4105	0.675117	0.675117	Mad2l1	IL1B		IL1B
1398256_at	0.0327003	0.0327003	2.78	-3.4106	0.780871	0.780871	Il1b	RASA3		RASA3
1370942_at	0.0327163	0.0327163	2.78	-3.4111	0.821576	0.821576	Rasa3	SLC15A1		SLC15A1
1369381_a_at	0.0327376	0.0327376	2.78	-3.4117	1.48392	1.48392	Slc15a1	TEX2		TEX2
1376038_at	0.0327894	0.0327894	2.77	-3.4132	0.51485	0.51485	Tex2	GRK6		GRK6
1388066_a_at	0.0330402	0.0330402	2.77	-3.4205	0.817895	0.817895	Grk6	PCOLCE		PCOLCE
1386912_at	0.0334173	0.0334173	2.76	-3.4313	0.554479	0.554479	Pcolce	TGFB1		TGFB1
1370082_at	0.0334801	0.0334801	2.76	-3.4331	1.13561	1.13561	Tgfb1	NDNL2		NDNL2
1376704_a_at	0.0336426	0.0336426	2.75	-3.4377	1.36702	1.36702	Ndnl2	ERH		ERH
1371544_at	0.0337093	0.0337093	2.75	-3.4396	0.666687	0.666687	Erh	RCL1		RCL1
1373452_at	0.0338091	0.0338091	2.75	-3.4424	0.529143	0.529143	Rcl1	PRPS2		PRPS2
1375932_at	0.0339969	0.0339969	2.75	-3.4477	1.07204	1.07204	Prps2	RGS18		RGS18
1379387_at	0.0340205	0.0340205	2.75	-3.4483	0.868745	0.868745	Rgs18	DNAJB1		DNAJB1
1388722_at	0.0342652	0.0342652	2.74	-3.4552	0.593101	0.593101	Dnajb1	TES		TES
1389409_at	0.0342741	0.0342741	2.74	-3.4554	2.06879	2.06879	Tes	GLTSCR1		GLTSCR1
1390519_at	0.0343813	0.0343813	2.74	-3.4584	1.27206	1.27206	Gltscr1	SF3A1		SF3A1
1374668_at	0.0345864	0.0345864	2.73	-3.464	1.11936	1.11936	Sf3a1	CTSE		CTSE
1368167_at	0.0345931	0.0345931	2.73	-3.4642	0.619636	0.619636	Ctse	SERPINE1		SERPINE1
1368519_at	0.0346505	0.0346505	2.73	-3.4658	2.4712	2.4712	Serpine1	GPR137B		GPR137B
1374126_at	0.0347632	0.0347632	2.73	-3.4689	0.562527	0.562527	Gpr137b	NEO1		NEO1
1371056_at	0.0348676	0.0348676	2.73	-3.4718	1.41601	1.41601	Neo1	FARSA		FARSA
1374255_at	0.0349996	0.0349996	2.72	-3.4754	0.516757	0.516757	Farsa	MDC1		MDC1
1375382_at	0.0350827	0.0350827	2.72	-3.4776	1.05733	1.05733	Mdc1	CYP1B1		CYP1B1
1368990_at	0.0351162	0.0351162	2.72	-3.4785	0.54492	0.54492	Cyp1b1	PARP2		PARP2
1383251_at	0.0351896	0.0351896	2.72	-3.4805	0.560583	0.560583	Parp2	CD52		CD52
1368338_at	0.0353297	0.0353297	2.72	-3.4843	1.50426	1.50426	Cd52	FERMT3		FERMT3
1388740_at	0.0354879	0.0354879	2.71	-3.4886	0.952132	0.952132	Fermt3	HTR2B		HTR2B
1369456_at	0.0356157	0.0356157	2.71	-3.492	0.665445	0.665445	Htr2b	SLC39A8		SLC39A8
1376709_at	0.0356216	0.0356216	2.71	-3.4921	0.974401	0.974401	Slc39a8	CD82		CD82
1386976_at	0.035653	0.035653	2.71	-3.493	0.7626	0.7626	Cd82	TNFSF13		TNFSF13
1377353_a_at	0.0356564	0.0356564	2.71	-3.4931	0.785835	0.785835	Tnfsf13	PDE7A		PDE7A
1371044_at	0.0358737	0.0358737	2.71	-3.4989	0.73559	0.73559	Pde7a	FLRT2		FLRT2
1390306_at	0.0359445	0.0359445	2.7	-3.5007	0.679288	0.679288	Flrt2	TGM1		TGM1
1370051_at	0.0360571	0.0360571	2.7	-3.5037	1.15099	1.15099	Tgm1	TAF13		TAF13
1374177_at	0.0361069	0.0361069	2.7	-3.505	0.570172	0.570172	Taf13	RGS3		RGS3
1376803_at	0.0361403	0.0361403	2.7	-3.5059	0.627624	0.627624	Rgs3	RAD51C		RAD51C
1390542_at	0.0362668	0.0362668	2.7	-3.5092	0.917977	0.917977	Rad51c	IL17B		IL17B
1376445_at	0.0362769	0.0362769	2.7	-3.5095	2.18377	2.18377	Il17b	ASS1		ASS1
1370964_at	0.0363242	0.0363242	2.7	-3.5107	0.714906	0.714906	Ass1	ANKRD44		ANKRD44
1374615_at	0.036382	0.036382	2.69	-3.5123	0.56115	0.56115	Ankrd44	PTPRF		PTPRF
1368035_a_at	0.0363978	0.0363978	2.69	-3.5127	0.530708	0.530708	Ptprf	KDELR3		KDELR3
1372870_at	0.0364358	0.0364358	2.69	-3.5137	0.726684	0.726684	Kdelr3	B4GALT1		B4GALT1
1371073_at	0.0366065	0.0366065	2.69	-3.5181	0.643392	0.643392	B4galt1	LOC685849		LOC685849
1375083_at	0.0366259	0.0366259	2.69	-3.5186	1.2054	1.2054	LOC685849	SLC6A9		SLC6A9
1369772_at	0.0367154	0.0367154	2.69	-3.5209	0.859513	0.859513	Slc6a9	SSR1		SSR1
1373090_at	0.0367432	0.0367432	2.69	-3.5217	0.659933	0.659933	Ssr1	PCGF6		PCGF6
1389760_at	0.0368214	0.0368214	2.69	-3.5237	0.500354	0.500354	Pcgf6	SPG21		SPG21
1388565_at	0.0368365	0.0368365	2.69	-3.5241	0.593842	0.593842	Spg21	DGAT2		DGAT2
1371615_at	0.0368973	0.0368973	2.68	-3.5256	0.571734	0.571734	Dgat2	CGM4		CGM4
1382690_at	0.0369	0.0369	2.68	-3.5257	0.580975	0.580975	Cgm4	RNF25		RNF25
1398336_at	0.0369147	0.0369147	2.68	-3.5261	1.63077	1.63077	Rnf25	ARHGDIA		ARHGDIA
1371366_at	0.0369823	0.0369823	2.68	-3.5278	0.527508	0.527508	Arhgdia	GBGT1		GBGT1
1387335_s_at	0.0370935	0.0370935	2.68	-3.5307	1.5538	1.5538	Gbgt1	MAN2A1		MAN2A1
1388667_at	0.0371635	0.0371635	2.68	-3.5325	1.11378	1.11378	Man2a1	PHF21A		PHF21A
1374078_at	0.0371769	0.0371769	2.68	-3.5328	0.574225	0.574225	Phf21a	LGMN		LGMN
1368430_at	0.0373981	0.0373981	2.67	-3.5385	0.838663	0.838663	Lgmn	MRTO4		MRTO4
1372043_at	0.0375162	0.0375162	2.67	-3.5415	0.762614	0.762614	Mrto4	SUDS3		SUDS3
1373954_at	0.0375351	0.0375351	2.67	-3.542	0.687017	0.687017	Suds3	PSEN1		PSEN1
1376075_at	0.0375828	0.0375828	2.67	-3.5432	0.581576	0.581576	Psen1	SOCS3		SOCS3
1369584_at	0.0376291	0.0376291	2.67	-3.5443	0.660779	0.660779	Socs3	ADAM15		ADAM15
1387135_at	0.0377167	0.0377167	2.67	-3.5466	0.75299	0.75299	Adam15	FST		FST
1372750_at	0.0377672	0.0377672	2.67	-3.5478	0.818649	0.818649	Fst	ACAP1		ACAP1
1376030_at	0.0379375	0.0379375	2.66	-3.5521	1.33641	1.33641	Acap1	TGFBI		TGFBI
1371913_at	0.038027	0.038027	2.66	-3.5544	0.940981	0.940981	Tgfbi	FAM57A		FAM57A
1375972_at	0.0380384	0.0380384	2.66	-3.5546	1.33746	1.33746	Fam57a	CNP		CNP
1387897_at	0.0380536	0.0380536	2.66	-3.555	0.592012	0.592012	Cnp	KDELR2		KDELR2
1371780_at	0.0382549	0.0382549	2.66	-3.56	0.525159	0.525159	Kdelr2	SLC6A17		SLC6A17
1370654_at	0.0383577	0.0383577	2.65	-3.5626	1.32305	1.32305	Slc6a17	PTGIS		PTGIS
1370012_at	0.0383963	0.0383963	2.65	-3.5636	1.33279	1.33279	Ptgis	LOC100912310		LOC100912310
1389630_at	0.038473	0.038473	2.65	-3.5655	0.657307	0.657307	LOC100912310	NXPH3		NXPH3
1374818_at	0.038619	0.038619	2.65	-3.5691	1.54855	1.54855	Nxph3	PDE3B		PDE3B
1369157_at	0.0388739	0.0388739	2.64	-3.5753	0.503716	0.503716	Pde3b	COLEC12		COLEC12
1372818_at	0.0389757	0.0389757	2.64	-3.5778	0.571473	0.571473	Colec12	PRSS35		PRSS35
1379747_at	0.0389981	0.0389981	2.64	-3.5784	0.877582	0.877582	Prss35	CD8A		CD8A
1369877_at	0.0391514	0.0391514	2.64	-3.5821	1.56111	1.56111	Cd8a	CKAP4		CKAP4
1375654_at	0.0393127	0.0393127	2.64	-3.586	1.32178	1.32178	Ckap4	TSSC4		TSSC4
1382841_at	0.0393601	0.0393601	2.64	-3.5871	0.593959	0.593959	Tssc4	EXT1		EXT1
1373393_at	0.0397561	0.0397561	2.63	-3.5967	0.519002	0.519002	Ext1	NECTIN2		NECTIN2
1375216_at	0.0398679	0.0398679	2.63	-3.5993	1.93109	1.93109	Nectin2	PAX8		PAX8
1387730_at	0.0398836	0.0398836	2.63	-3.5997	0.874096	0.874096	Pax8	FNIP2		FNIP2
1373986_at	0.0398855	0.0398855	2.63	-3.5998	0.576554	0.576554	Fnip2	BCLAF1		BCLAF1
1373868_at	0.0398912	0.0398912	2.63	-3.5999	0.634103	0.634103	Bclaf1	RGD1564450		RGD1564450
1376801_at	0.0399232	0.0399232	2.62	-3.6007	1.83439	1.83439	RGD1564450	FAM49B		FAM49B
1372303_at	0.0399623	0.0399623	2.62	-3.6016	0.729007	0.729007	Fam49b	NDRG1		NDRG1
1371360_at	0.0404543	0.0404543	2.61	-3.6132	0.671237	0.671237	Ndrg1	RPS4Y2		RPS4Y2
1388398_at	0.0405715	0.0405715	2.61	-3.616	0.507541	0.507541	Rps4y2	GRB10		GRB10
1371517_at	0.0407059	0.0407059	2.61	-3.6191	0.706969	0.706969	Grb10	IDI1		IDI1
1368878_at	0.0407221	0.0407221	2.61	-3.6195	0.706656	0.706656	Idi1	RAI14		RAI14
1389263_at	0.0410971	0.0410971	2.6	-3.6282	0.645141	0.645141	Rai14	PURB		PURB
1375114_at	0.0411584	0.0411584	2.6	-3.6296	0.964329	0.964329	Purb	SCNN1G		SCNN1G
1370481_at	0.0412243	0.0412243	2.6	-3.6312	1.73747	1.73747	Scnn1g	GUCY1B3		GUCY1B3
1374389_at	0.0416542	0.0416542	2.59	-3.641	0.694859	0.694859	Gucy1b3	CTSA		CTSA
1371325_at	0.0417197	0.0417197	2.59	-3.6425	0.590777	0.590777	Ctsa	FLNA		FLNA
1371382_at	0.0417397	0.0417397	2.59	-3.643	0.615364	0.615364	Flna	CCL27		CCL27
1376850_a_at	0.0417512	0.0417512	2.59	-3.6432	0.570527	0.570527	Ccl27	AP3S1		AP3S1
1373024_at	0.041945	0.041945	2.59	-3.6476	0.58898	0.58898	Ap3s1	LPCAT4		LPCAT4
1373971_at	0.0423527	0.0423527	2.58	-3.6568	1.41365	1.41365	Lpcat4	CRELD2		CRELD2
1377016_at	0.0424367	0.0424367	2.58	-3.6587	0.840777	0.840777	Creld2	FGL2		FGL2
1370623_at	0.0424753	0.0424753	2.58	-3.6596	0.778872	0.778872	Fgl2	ANXA4		ANXA4
1368908_at	0.0425934	0.0425934	2.58	-3.6622	0.730205	0.730205	Anxa4	SLC50A1		SLC50A1
1389705_at	0.0428587	0.0428587	2.57	-3.6681	0.506657	0.506657	Slc50a1	PPP1R12C		PPP1R12C
1372625_at	0.0429485	0.0429485	2.57	-3.6701	0.518422	0.518422	Ppp1r12c	KCTD3		KCTD3
1373119_at	0.043122	0.043122	2.57	-3.674	1.69375	1.69375	Kctd3	HBZ		HBZ
1371294_at	0.0435249	0.0435249	2.56	-3.6828	0.538463	0.538463	Hbz	RFC3		RFC3
1389326_at	0.0436727	0.0436727	2.56	-3.686	0.701351	0.701351	Rfc3	TBC1D13		TBC1D13
1389642_at	0.0438633	0.0438633	2.55	-3.6902	0.568229	0.568229	Tbc1d13	GRN		GRN
1386893_at	0.0439096	0.0439096	2.55	-3.6912	0.580512	0.580512	Grn	HMGCS1		HMGCS1
1367932_at	0.0440916	0.0440916	2.55	-3.6951	0.505232	0.505232	Hmgcs1	XBP1		XBP1
1371249_at	0.044306	0.044306	2.55	-3.6997	0.517065	0.517065	Xbp1	RIN3		RIN3
1375020_at	0.0443397	0.0443397	2.55	-3.7004	0.513918	0.513918	Rin3	PTTG1		PTTG1
1367780_at	0.0443463	0.0443463	2.55	-3.7006	0.785384	0.785384	Pttg1	LAMP2		LAMP2
1370010_at	0.0445686	0.0445686	2.54	-3.7053	0.569047	0.569047	Lamp2	HSD17B7		HSD17B7
1389430_at	0.0447322	0.0447322	2.54	-3.7088	1.59432	1.59432	Hsd17b7	CACNA1F		CACNA1F
1387846_at	0.0447824	0.0447824	2.54	-3.7099	1.19692	1.19692	Cacna1f	ERP29		ERP29
1387031_at	0.0448193	0.0448193	2.54	-3.7106	0.525758	0.525758	Erp29	AGA		AGA
1372421_at	0.0448377	0.0448377	2.54	-3.711	0.554666	0.554666	Aga	ALDH1A2		ALDH1A2
1368003_at	0.0449671	0.0449671	2.54	-3.7138	0.802459	0.802459	Aldh1a2	RNASET2		RNASET2
1375211_at	0.0450249	0.0450249	2.53	-3.715	0.638789	0.638789	Rnaset2	DOCK8		DOCK8
1377835_at	0.0450347	0.0450347	2.53	-3.7152	0.833915	0.833915	Dock8	SLC22A2		SLC22A2
1387303_at	0.0456958	0.0456958	2.52	-3.729	1.37282	1.37282	Slc22a2	XPO6		XPO6
1389063_at	0.0457315	0.0457315	2.52	-3.7298	0.605326	0.605326	Xpo6	CSTB		CSTB
1370226_at	0.0458718	0.0458718	2.52	-3.7327	0.559203	0.559203	Cstb	SSBP3		SSBP3
1368517_at	0.046105	0.046105	2.52	-3.7375	1.39958	1.39958	Ssbp3	PFN1		PFN1
1367605_at	0.0461967	0.0461967	2.52	-3.7394	0.553368	0.553368	Pfn1	NEGR1		NEGR1
1387204_at	0.0462309	0.0462309	2.51	-3.7401	1.13907	1.13907	Negr1	BLVRA		BLVRA
1368164_at	0.0465062	0.0465062	2.51	-3.7457	0.612423	0.612423	Blvra	CASP8		CASP8
1369262_at	0.0466534	0.0466534	2.51	-3.7487	1.52327	1.52327	Casp8	CD86		CD86
1387627_at	0.0466847	0.0466847	2.51	-3.7494	0.574457	0.574457	Cd86	SLC35A4		SLC35A4
1370303_at	0.0466969	0.0466969	2.51	-3.7496	0.510441	0.510441	Slc35a4	LRWD1		LRWD1
1373715_at	0.0467648	0.0467648	2.51	-3.751	0.682266	0.682266	Lrwd1	GAB2		GAB2
1369458_at	0.0471239	0.0471239	2.5	-3.7582	1.31025	1.31025	Gab2	DRAM1		DRAM1
1389732_at	0.0471281	0.0471281	2.5	-3.7583	0.57565	0.57565	Dram1	SEC13		SEC13
1371437_at	0.0472954	0.0472954	2.5	-3.7617	0.574323	0.574323	Sec13	POU2F2		POU2F2
1375649_at	0.0477419	0.0477419	2.49	-3.7706	1.54759	1.54759	Pou2f2	OSTF1		OSTF1
1372246_at	0.0479773	0.0479773	2.49	-3.7753	0.621956	0.621956	Ostf1	SKIV2L		SKIV2L
1399112_at	0.0479882	0.0479882	2.49	-3.7755	1.74057	1.74057	Skiv2l	CYFIP1		CYFIP1
1389294_at	0.0479904	0.0479904	2.49	-3.7755	0.524527	0.524527	Cyfip1	LOC100910286		LOC100910286
1376513_a_at	0.048071	0.048071	2.49	-3.7771	0.699276	0.699276	LOC100910286	ELOVL6		ELOVL6
1388108_at	0.0481351	0.0481351	2.48	-3.7784	1.24432	1.24432	Elovl6	NIP7		NIP7
1387950_at	0.0483313	0.0483313	2.48	-3.7822	0.519995	0.519995	Nip7	KIFC1		KIFC1
1376185_at	0.0483482	0.0483482	2.48	-3.7826	1.02445	1.02445	Kifc1	GGH		GGH
1368470_at	0.0483995	0.0483995	2.48	-3.7836	0.557653	0.557653	Ggh	TMPO		TMPO
1387070_at	0.0484086	0.0484086	2.48	-3.7838	0.982619	0.982619	Tmpo	LY86		LY86
1393280_at	0.048493	0.048493	2.48	-3.7854	0.618555	0.618555	Ly86	SLC12A5		SLC12A5
1370069_at	0.0486203	0.0486203	2.48	-3.7879	0.677084	0.677084	Slc12a5	CDC42EP5		CDC42EP5
1389378_at	0.0486738	0.0486738	2.48	-3.7889	0.768552	0.768552	Cdc42ep5	LOC102547700		LOC102547700
1376098_a_at	0.048735	0.048735	2.48	-3.7901	0.657502	0.657502	LOC102547700	UBL5		UBL5
1399128_at	0.0487579	0.0487579	2.48	-3.7906	1.80163	1.80163	Ubl5	PCDHB12		PCDHB12
1370490_at	0.0487802	0.0487802	2.47	-3.791	0.658554	0.658554	Pcdhb12	IFITM10		IFITM10
1375066_at	0.0488022	0.0488022	2.47	-3.7914	0.627061	0.627061	Ifitm10	CKS2		CKS2
1373823_at	0.0488658	0.0488658	2.47	-3.7927	0.962532	0.962532	Cks2	RGD1310127		RGD1310127
1389330_at	0.0489535	0.0489535	2.47	-3.7944	0.626323	0.626323	RGD1310127	PTN		PTN
1369968_at	0.0490295	0.0490295	2.47	-3.7958	0.989168	0.989168	Ptn	RPL7		RPL7
1375788_at	0.0492107	0.0492107	2.47	-3.7993	0.671891	0.671891	Rpl7	FAM104B		FAM104B
1375906_at	0.0492595	0.0492595	2.47	-3.8003	0.585588	0.585588	Fam104b	ATP6V0E1		ATP6V0E1
1367724_a_at	0.0495964	0.0495964	2.46	-3.8067	0.629713	0.629713	Atp6v0e1	LOC688452		LOC688452
1374155_at	0.0498278	0.0498278	2.46	-3.8112	0.757216	0.757216	LOC688452

## Sheet: down
ID	adj.P.Val	P.Value	t	B	abslogFC	logFC	Gene.symbol	CAMK1G			CAMK1G
1377518_at	1.13e-05	1.13e-05	-13.6	2.5464	1.95076	-1.95076	Camk1g	TM7SF2			TM7SF2
1389725_at	7.31e-05	7.31e-05	-9.76	1.6096	2.62866	-2.62866	Tm7sf2	TMEM70			TMEM70
1389829_at	0.0001768	0.0001768	-8.33	1.0505	1.39862	-1.39862	Tmem70	PALMD			PALMD
1376925_at	0.000316	0.000316	-7.49	0.6436	2.64381	-2.64381	Palmd	SLC6A15			SLC6A15
1387968_at	0.0004014	0.0004014	-7.16	0.4674	1.69824	-1.69824	Slc6a15	RAB3A			RAB3A
1369816_at	0.0004962	0.0004962	-6.88	0.3072	1.24852	-1.24852	Rab3a	RPL37A			RPL37A
1371504_at	0.0005087	0.0005087	-6.85	0.2881	1.31331	-1.31331	Rpl37a	SERPINA6			SERPINA6
1373686_at	0.0005473	0.0005473	-6.76	0.2318	3.84513	-3.84513	Serpina6	BMPR1A			BMPR1A
1368899_at	0.0006518	0.0006518	-6.54	0.0956	0.963508	-0.963508	Bmpr1a	LNX1			LNX1
1389464_at	0.0008979	0.0008979	-6.15	-0.1601	1.12897	-1.12897	Lnx1	GAS1			GAS1
1398419_at	0.0010057	0.0010057	-6.02	-0.2524	2.27467	-2.27467	Gas1	AKAP1			AKAP1
1388070_a_at	0.0011633	0.0011633	-5.85	-0.3724	1.11471	-1.11471	Akap1	OCLN			OCLN
1398281_at	0.0011661	0.0011661	-5.85	-0.3743	2.42287	-2.42287	Ocln	B4GALNT4			B4GALNT4
1375691_at	0.0011896	0.0011896	-5.83	-0.3909	1.08918	-1.08918	B4galnt4	NUDT8			NUDT8
1389834_at	0.001303	0.001303	-5.72	-0.4668	1.92285	-1.92285	Nudt8	GUCY2D			GUCY2D
1369223_at	0.0013241	0.0013241	-5.71	-0.4803	1.70162	-1.70162	Gucy2d	PRPF3			PRPF3
1393985_at	0.0013404	0.0013404	-5.69	-0.4905	2.06407	-2.06407	Prpf3	SLC13A4			SLC13A4
1390532_at	0.0013866	0.0013866	-5.65	-0.519	2.11907	-2.11907	Slc13a4	AATK			AATK
1385333_at	0.0013937	0.0013937	-5.65	-0.5233	1.25422	-1.25422	Aatk	KCNE2			KCNE2
1386770_x_at	0.0014338	0.0014338	-5.62	-0.5471	1.79775	-1.79775	Kcne2	MAPK8IP2			MAPK8IP2
1377488_at	0.0014774	0.0014774	-5.58	-0.5724	0.947003	-0.947003	Mapk8ip2	APOB			APOB
1388190_at	0.001577	0.001577	-5.51	-0.6277	1.19809	-1.19809	Apob	NR2F6			NR2F6
1375112_at	0.0016082	0.0016082	-5.49	-0.6444	1.29451	-1.29451	Nr2f6	RABGAP1			RABGAP1
1367545_at	0.0016601	0.0016601	-5.46	-0.6714	0.746906	-0.746906	Rabgap1	FLYWCH1			FLYWCH1
1386618_at	0.0016865	0.0016865	-5.44	-0.6849	1.20312	-1.20312	Flywch1	LRFN2			LRFN2
1376961_at	0.0018896	0.0018896	-5.32	-0.7823	1.93082	-1.93082	Lrfn2	U2AF1L4			U2AF1L4
1373205_at	0.001958	0.001958	-5.28	-0.8129	0.76839	-0.76839	U2af1l4	SOST			SOST
1368969_at	0.0020199	0.0020199	-5.25	-0.8398	1.81123	-1.81123	Sost	FGFBP1			FGFBP1
1368349_at	0.0022009	0.0022009	-5.16	-0.9143	1.564	-1.564	Fgfbp1	FGF18			FGF18
1370106_at	0.002298	0.002298	-5.11	-0.9519	1.77777	-1.77777	Fgf18	IL2RA			IL2RA
1387591_at	0.0023273	0.0023273	-5.1	-0.9629	1.09612	-1.09612	Il2ra	ART1			ART1
1377275_at	0.0023278	0.0023278	-5.1	-0.9631	0.965354	-0.965354	Art1	GRB2			GRB2
1370617_at	0.002414	0.002414	-5.06	-0.9949	0.984635	-0.984635	Grb2	BAZ2B			BAZ2B
1376533_at	0.0024421	0.0024421	-5.05	-1.005	1.43461	-1.43461	Baz2b	RGD1311251			RGD1311251
1393464_at	0.0029193	0.0029193	-4.87	-1.1622	0.653038	-0.653038	RGD1311251	IQSEC1			IQSEC1
1372358_at	0.0034367	0.0034367	-4.71	-1.3074	0.719552	-0.719552	Iqsec1	ZFAND4			ZFAND4
1388029_at	0.0036096	0.0036096	-4.66	-1.3514	2.0698	-2.0698	Zfand4	ST3GAL3			ST3GAL3
1369539_at	0.0038152	0.0038152	-4.61	-1.4011	0.698794	-0.698794	St3gal3	FLAD1			FLAD1
1373758_at	0.0038799	0.0038799	-4.59	-1.4163	0.673274	-0.673274	Flad1	ADRA1B			ADRA1B
1368574_at	0.0041769	0.0041769	-4.52	-1.4828	0.668795	-0.668795	Adra1b	HDAC4			HDAC4
1376761_at	0.0044743	0.0044743	-4.46	-1.5451	0.854298	-0.854298	Hdac4	LSAMP			LSAMP
1370550_at	0.0045613	0.0045613	-4.44	-1.5625	0.803965	-0.803965	Lsamp	CREBBP			CREBBP
1387619_at	0.0046105	0.0046105	-4.43	-1.5723	1.30058	-1.30058	Crebbp	NUP58			NUP58
1388073_a_at	0.0049153	0.0049153	-4.37	-1.6305	0.89871	-0.89871	Nup58	PLPP7			PLPP7
1371897_at	0.0049465	0.0049465	-4.36	-1.6363	0.612537	-0.612537	Plpp7	LAMA2			LAMA2
1390404_at	0.0049974	0.0049974	-4.35	-1.6456	0.653773	-0.653773	Lama2	FCGBPL1			FCGBPL1
1375039_x_at	0.0050513	0.0050513	-4.34	-1.6554	2.12159	-2.12159	Fcgbpl1	ZFP956			ZFP956
1390625_at	0.0051084	0.0051084	-4.33	-1.6657	1.69038	-1.69038	Zfp956	RSPH1			RSPH1
1391228_at	0.0053157	0.0053157	-4.29	-1.702	2.1527	-2.1527	Rsph1	PITX3			PITX3
1370222_at	0.0053991	0.0053991	-4.28	-1.7162	1.34701	-1.34701	Pitx3	MCPT2			MCPT2
1371260_at	0.0054078	0.0054078	-4.28	-1.7177	2.59001	-2.59001	Mcpt2	ECHDC2			ECHDC2
1374527_at	0.0054203	0.0054203	-4.28	-1.7198	0.661431	-0.661431	Echdc2	PRKAB2			PRKAB2
1369271_at	0.0054664	0.0054664	-4.27	-1.7276	0.595177	-0.595177	Prkab2	KCNK4			KCNK4
1370110_at	0.0055858	0.0055858	-4.25	-1.7474	2.19129	-2.19129	Kcnk4	SLC4A4			SLC4A4
1369756_a_at	0.0056368	0.0056368	-4.24	-1.7557	1.62537	-1.62537	Slc4a4	LOC102551541			LOC102551541
1374801_at	0.005767	0.005767	-4.22	-1.7766	1.63287	-1.63287	LOC102551541	BEX1			BEX1
1388802_at	0.0059382	0.0059382	-4.19	-1.8035	0.841673	-0.841673	Bex1	SULT2A2			SULT2A2
1387936_at	0.0060175	0.0060175	-4.18	-1.8157	3.18113	-3.18113	Sult2a2	DMTN			DMTN
1388998_at	0.0060676	0.0060676	-4.17	-1.8233	1.19986	-1.19986	Dmtn	PMF31			PMF31
1387929_at	0.0062293	0.0062293	-4.15	-1.8475	0.675879	-0.675879	Pmf31	PPARD			PPARD
1387684_at	0.0064718	0.0064718	-4.11	-1.8827	0.667289	-0.667289	Ppard	MICU2			MICU2
1372105_at	0.0065983	0.0065983	-4.1	-1.9006	0.565342	-0.565342	Micu2	MYF6			MYF6
1387181_at	0.0066768	0.0066768	-4.09	-1.9115	1.15633	-1.15633	Myf6	SULT1E1			SULT1E1
1368733_at	0.0067538	0.0067538	-4.08	-1.9221	0.673467	-0.673467	Sult1e1	IMMT			IMMT
1372080_at	0.006964	0.006964	-4.05	-1.9504	0.585605	-0.585605	Immt	MAPRE3			MAPRE3
1374062_x_at	0.0070232	0.0070232	-4.04	-1.9583	0.619624	-0.619624	Mapre3	ISCA1			ISCA1
1388613_at	0.0072894	0.0072894	-4.01	-1.9927	0.564853	-0.564853	Isca1	RREB1			RREB1
1388710_at	0.0074043	0.0074043	-3.99	-2.0072	0.646222	-0.646222	Rreb1	GATA6			GATA6
1368827_at	0.007587	0.007587	-3.97	-2.0298	0.697445	-0.697445	Gata6	SHROOM1			SHROOM1
1374373_at	0.0078339	0.0078339	-3.94	-2.0596	2.05475	-2.05475	Shroom1	CHMP2B			CHMP2B
1375764_at	0.008078	0.008078	-3.92	-2.0881	2.21393	-2.21393	Chmp2b	LRRC4B			LRRC4B
1375149_at	0.0082611	0.0082611	-3.9	-2.109	0.858019	-0.858019	Lrrc4b	USP2			USP2
1375549_at	0.008405	0.008405	-3.88	-2.125	0.78951	-0.78951	Usp2	EHD4			EHD4
1374399_at	0.0084667	0.0084667	-3.88	-2.1319	0.602114	-0.602114	Ehd4	LAD1			LAD1
1374195_at	0.0084822	0.0084822	-3.87	-2.1336	1.07796	-1.07796	Lad1	DHRS7C			DHRS7C
1389079_at	0.0085228	0.0085228	-3.87	-2.138	0.871133	-0.871133	Dhrs7c	MAPT			MAPT
1387071_a_at	0.0085493	0.0085493	-3.87	-2.1409	0.762712	-0.762712	Mapt	SERPINA11			SERPINA11
1376174_at	0.0087373	0.0087373	-3.85	-2.1612	1.62428	-1.62428	Serpina11	VIPR2			VIPR2
1387177_at	0.0088684	0.0088684	-3.84	-2.1751	0.816128	-0.816128	Vipr2	44257			44257
1389870_at	0.0089039	0.0089039	-3.83	-2.1788	0.964142	-0.964142	2021-03-02	FITM2			FITM2
1374278_at	0.0089512	0.0089512	-3.83	-2.1838	1.02314	-1.02314	Fitm2	MYH7			MYH7
1367928_at	0.0089826	0.0089826	-3.82	-2.187	0.736053	-0.736053	Myh7	TLX3			TLX3
1390479_at	0.009092	0.009092	-3.81	-2.1983	0.797768	-0.797768	Tlx3	EHD1			EHD1
1388623_at	0.0091642	0.0091642	-3.81	-2.2057	0.727608	-0.727608	Ehd1	TIMM44			TIMM44
1398261_at	0.0092445	0.0092445	-3.8	-2.2139	0.572731	-0.572731	Timm44	TANGO2			TANGO2
1372044_at	0.0092622	0.0092622	-3.8	-2.2157	0.610729	-0.610729	Tango2	GYS1			GYS1
1374541_at	0.009284	0.009284	-3.8	-2.2179	0.635951	-0.635951	Gys1	TMED4			TMED4
1376161_at	0.0093307	0.0093307	-3.79	-2.2225	0.657168	-0.657168	Tmed4	SLC23A3			SLC23A3
1386454_at	0.0094154	0.0094154	-3.78	-2.231	0.795655	-0.795655	Slc23a3	RNMT			RNMT
1398572_at	0.0094751	0.0094751	-3.78	-2.2369	0.549576	-0.549576	Rnmt	ASTN1			ASTN1
1388963_at	0.0096424	0.0096424	-3.76	-2.2533	0.798275	-0.798275	Astn1	ADSSL1			ADSSL1
1374677_at	0.0097018	0.0097018	-3.76	-2.259	0.781785	-0.781785	Adssl1	MYH13			MYH13
1371075_at	0.00971	0.00971	-3.76	-2.2598	1.0696	-1.0696	Myh13	SPARCL1			SPARCL1
1386865_at	0.0097558	0.0097558	-3.75	-2.2642	0.797258	-0.797258	Sparcl1	SLC41A3			SLC41A3
1392939_at	0.0100311	0.0100311	-3.73	-2.2903	0.66148	-0.66148	Slc41a3	GSTA3			GSTA3
1371089_at	0.0101415	0.0101415	-3.72	-2.3005	2.80415	-2.80415	Gsta3	NME4			NME4
1372959_at	0.0101666	0.0101666	-3.72	-2.3029	0.623635	-0.623635	Nme4	DSC2			DSC2
1375936_at	0.0101687	0.0101687	-3.72	-2.3031	0.672849	-0.672849	Dsc2	NDUFS1			NDUFS1
1371577_at	0.0101812	0.0101812	-3.72	-2.3042	0.54397	-0.54397	Ndufs1	MRPL44			MRPL44
1383157_at	0.0102269	0.0102269	-3.71	-2.3084	0.602519	-0.602519	Mrpl44	LDHD			LDHD
1382061_at	0.0102319	0.0102319	-3.71	-2.3089	0.615266	-0.615266	Ldhd	UBAC1			UBAC1
1388387_at	0.0102686	0.0102686	-3.71	-2.3122	0.566561	-0.566561	Ubac1	KIF3C			KIF3C
1387657_at	0.0103663	0.0103663	-3.7	-2.3211	1.11647	-1.11647	Kif3c	PPCDC			PPCDC
1373236_at	0.0103987	0.0103987	-3.7	-2.324	1.99411	-1.99411	Ppcdc	ZFPM1			ZFPM1
1375148_at	0.0104034	0.0104034	-3.7	-2.3245	1.28092	-1.28092	Zfpm1	KLHL31			KLHL31
1373684_at	0.0105652	0.0105652	-3.68	-2.3389	0.7412	-0.7412	Klhl31	DDAH2			DDAH2
1371436_at	0.0105945	0.0105945	-3.68	-2.3415	0.976117	-0.976117	Ddah2	EHHADH			EHHADH
1368283_at	0.0108578	0.0108578	-3.66	-2.3646	0.761942	-0.761942	Ehhadh	GYS2			GYS2
1368328_at	0.0110002	0.0110002	-3.65	-2.3768	2.27544	-2.27544	Gys2	GPSM1			GPSM1
1372383_at	0.0110025	0.0110025	-3.65	-2.377	0.614219	-0.614219	Gpsm1	FEM1A			FEM1A
1398417_at	0.0110067	0.0110067	-3.65	-2.3774	0.559062	-0.559062	Fem1a	CNR1			CNR1
1369677_at	0.0110379	0.0110379	-3.65	-2.38	0.850688	-0.850688	Cnr1	DYNLL2			DYNLL2
1372612_at	0.0111676	0.0111676	-3.64	-2.391	0.546444	-0.546444	Dynll2	KIT			KIT
1369822_at	0.0112007	0.0112007	-3.64	-2.3938	0.863605	-0.863605	Kit	NPTXR			NPTXR
1387481_at	0.0113067	0.0113067	-3.63	-2.4026	2.16934	-2.16934	Nptxr	PDP1			PDP1
1368910_at	0.0114032	0.0114032	-3.62	-2.4106	0.595262	-0.595262	Pdp1	IL7R			IL7R
1386052_at	0.0114193	0.0114193	-3.62	-2.412	0.834397	-0.834397	Il7r	CAP2			CAP2
1368893_at	0.0114385	0.0114385	-3.62	-2.4136	0.75552	-0.75552	Cap2	VEPH1			VEPH1
1377437_at	0.0116194	0.0116194	-3.6	-2.4283	0.757375	-0.757375	Veph1	PPP2R3A			PPP2R3A
1375990_a_at	0.0117247	0.0117247	-3.6	-2.4368	0.607985	-0.607985	Ppp2r3a	DUSP23			DUSP23
1374379_at	0.0117378	0.0117378	-3.6	-2.4379	1.34179	-1.34179	Dusp23	ELMOD1			ELMOD1
1389781_at	0.0117493	0.0117493	-3.59	-2.4388	2.17348	-2.17348	Elmod1	MBP			MBP
1387341_a_at	0.0118004	0.0118004	-3.59	-2.4429	0.804077	-0.804077	Mbp	LRRC14B			LRRC14B
1376927_at	0.0118347	0.0118347	-3.59	-2.4456	0.60144	-0.60144	Lrrc14b	MFN1			MFN1
1371717_at	0.0119033	0.0119033	-3.58	-2.451	0.528912	-0.528912	Mfn1	CTNNAL1			CTNNAL1
1398354_at	0.0119966	0.0119966	-3.58	-2.4584	0.518409	-0.518409	Ctnnal1	ARFRP1			ARFRP1
1389158_at	0.0122609	0.0122609	-3.56	-2.4789	0.617021	-0.617021	Arfrp1	NEU3			NEU3
1369420_at	0.0127886	0.0127886	-3.52	-2.5186	0.571	-0.571	Neu3	CYP4A8			CYP4A8
1393894_at	0.0128254	0.0128254	-3.52	-2.5213	1.42998	-1.42998	Cyp4a8	SLC25A29			SLC25A29
1390483_at	0.0129343	0.0129343	-3.51	-2.5293	0.598013	-0.598013	Slc25a29	MPP4			MPP4
1369260_a_at	0.0129718	0.0129718	-3.51	-2.5321	0.61223	-0.61223	Mpp4	WDR92			WDR92
1390163_at	0.0129723	0.0129723	-3.51	-2.5321	0.729284	-0.729284	Wdr92	ANK1			ANK1
1389398_at	0.0129795	0.0129795	-3.51	-2.5326	0.712676	-0.712676	Ank1	PGAM2			PGAM2
1367951_at	0.0130359	0.0130359	-3.51	-2.5367	0.82662	-0.82662	Pgam2	TMEM45B			TMEM45B
1390123_at	0.0130752	0.0130752	-3.51	-2.5395	0.857655	-0.857655	Tmem45b	ZP3			ZP3
1368757_at	0.0130911	0.0130911	-3.5	-2.5407	1.21526	-1.21526	Zp3	SGCA			SGCA
1372240_at	0.0133087	0.0133087	-3.49	-2.5563	0.583279	-0.583279	Sgca	MYH6			MYH6
1387049_at	0.0133145	0.0133145	-3.49	-2.5567	0.976668	-0.976668	Myh6	GATAD1			GATAD1
1389925_at	0.0135003	0.0135003	-3.48	-2.5697	1.18209	-1.18209	Gatad1	HIST1H1D			HIST1H1D
1369768_at	0.0136734	0.0136734	-3.47	-2.5818	0.627354	-0.627354	Hist1h1d	PNMT			PNMT
1371054_at	0.0137441	0.0137441	-3.46	-2.5867	1.04288	-1.04288	Pnmt	PERP			PERP
1372423_at	0.013776	0.013776	-3.46	-2.5888	0.652847	-0.652847	Perp	PGRMC2			PGRMC2
1389169_at	0.0139513	0.0139513	-3.45	-2.6008	0.5031	-0.5031	Pgrmc2	CUX2			CUX2
1390622_at	0.013953	0.013953	-3.45	-2.6009	0.818051	-0.818051	Cux2	MCCC1			MCCC1
1376852_at	0.0139791	0.0139791	-3.45	-2.6027	0.573272	-0.573272	Mccc1	RASL10B			RASL10B
1398418_at	0.014132	0.014132	-3.44	-2.613	2.65272	-2.65272	Rasl10b	TTR			TTR
1367598_at	0.0142525	0.0142525	-3.43	-2.621	0.739834	-0.739834	Ttr	CASP9			CASP9
1370737_at	0.0144817	0.0144817	-3.42	-2.6361	0.781178	-0.781178	Casp9	A1BG			A1BG
1369509_a_at	0.0145611	0.0145611	-3.42	-2.6412	1.62738	-1.62738	A1bg	MORC2			MORC2
1389357_at	0.0147639	0.0147639	-3.41	-2.6543	0.840467	-0.840467	Morc2	44443			44443
1389448_at	0.0148588	0.0148588	-3.4	-2.6604	0.512601	-0.512601	2021-09-04	LY6G6C			LY6G6C
1374342_at	0.0149612	0.0149612	-3.39	-2.6669	0.563466	-0.563466	Ly6g6c	MASP1			MASP1
1389543_at	0.0150669	0.0150669	-3.39	-2.6736	0.593747	-0.593747	Masp1	LCAT			LCAT
1367887_at	0.0152556	0.0152556	-3.38	-2.6853	0.705485	-0.705485	Lcat	VSNL1			VSNL1
1368854_at	0.0154929	0.0154929	-3.37	-2.7	0.934343	-0.934343	Vsnl1	EPHA5			EPHA5
1371007_at	0.0155221	0.0155221	-3.36	-2.7017	1.31066	-1.31066	Epha5	GRASP			GRASP
1370723_at	0.0156629	0.0156629	-3.36	-2.7103	1.61209	-1.61209	Grasp	MRPS26			MRPS26
1375166_at	0.0156649	0.0156649	-3.36	-2.7104	1.65857	-1.65857	Mrps26	CCSER2			CCSER2
1388688_at	0.0158155	0.0158155	-3.35	-2.7195	0.54459	-0.54459	Ccser2	GUCY2C			GUCY2C
1369162_at	0.0159263	0.0159263	-3.34	-2.7261	1.25582	-1.25582	Gucy2c	PKNOX2			PKNOX2
1375053_at	0.0159326	0.0159326	-3.34	-2.7265	0.518248	-0.518248	Pknox2	ASZ1			ASZ1
1369486_at	0.0159871	0.0159871	-3.34	-2.7297	0.611964	-0.611964	Asz1	PCMT1			PCMT1
1371966_at	0.0160028	0.0160028	-3.34	-2.7306	0.549932	-0.549932	Pcmt1	SCNM1			SCNM1
1373377_at	0.0160843	0.0160843	-3.34	-2.7355	0.528967	-0.528967	Scnm1	NPRL3			NPRL3
1373948_at	0.0161365	0.0161365	-3.33	-2.7385	0.568566	-0.568566	Nprl3	ULK1			ULK1
1375869_at	0.0165662	0.0165662	-3.31	-2.7634	0.504284	-0.504284	Ulk1	LOC102554877			LOC102554877
1377314_at	0.0165802	0.0165802	-3.31	-2.7642	1.73342	-1.73342	LOC102554877	SLC2A4			SLC2A4
1388958_a_at	0.0167445	0.0167445	-3.3	-2.7736	0.69121	-0.69121	Slc2a4	SLC18A1			SLC18A1
1387999_at	0.0167771	0.0167771	-3.3	-2.7754	1.55953	-1.55953	Slc18a1	MRM2			MRM2
1376512_at	0.0168138	0.0168138	-3.3	-2.7775	0.628664	-0.628664	Mrm2	GABRB2			GABRB2
1377773_at	0.0168292	0.0168292	-3.3	-2.7784	0.743652	-0.743652	Gabrb2	MACROD1			MACROD1
1372158_at	0.0168413	0.0168413	-3.3	-2.7791	0.60527	-0.60527	Macrod1	LOC100911217			LOC100911217
1376296_at	0.0169183	0.0169183	-3.29	-2.7834	0.753184	-0.753184	LOC100911217	GULO			GULO
1369837_at	0.0169561	0.0169561	-3.29	-2.7855	0.875907	-0.875907	Gulo	TMEM246			TMEM246
1372682_at	0.0172038	0.0172038	-3.28	-2.7993	0.945165	-0.945165	Tmem246	CBY1			CBY1
1388859_at	0.0172253	0.0172253	-3.28	-2.8004	0.584865	-0.584865	Cby1	GBAS			GBAS
1376175_at	0.0173741	0.0173741	-3.27	-2.8086	0.666411	-0.666411	Gbas	CDK2AP1			CDK2AP1
1375326_at	0.0173962	0.0173962	-3.27	-2.8098	1.14757	-1.14757	Cdk2ap1	ADH4			ADH4
1369863_at	0.0174843	0.0174843	-3.27	-2.8146	0.911639	-0.911639	Adh4	PVALB			PVALB
1370214_at	0.0175003	0.0175003	-3.27	-2.8155	2.01146	-2.01146	Pvalb	WNK2			WNK2
1398458_at	0.0177176	0.0177176	-3.26	-2.8272	0.834107	-0.834107	Wnk2	HDAC11			HDAC11
1374954_at	0.0178058	0.0178058	-3.25	-2.8319	0.649053	-0.649053	Hdac11	MCRIP2			MCRIP2
1371976_at	0.0178569	0.0178569	-3.25	-2.8346	0.64512	-0.64512	Mcrip2	SV2A			SV2A
1368682_at	0.0178979	0.0178979	-3.25	-2.8368	1.6885	-1.6885	Sv2a	PFKM			PFKM
1386961_at	0.0179355	0.0179355	-3.25	-2.8388	0.759064	-0.759064	Pfkm	DDT			DDT
1367793_at	0.0182267	0.0182267	-3.23	-2.8541	0.547546	-0.547546	Ddt	ATPIF1			ATPIF1
1371230_x_at	0.0183921	0.0183921	-3.23	-2.8627	0.998051	-0.998051	Atpif1	CAPN9			CAPN9
1371088_at	0.0184019	0.0184019	-3.23	-2.8632	0.580011	-0.580011	Capn9	ADPRHL1			ADPRHL1
1374166_at	0.018664	0.018664	-3.21	-2.8766	0.610831	-0.610831	Adprhl1	LOC102551716			LOC102551716
1377306_at	0.0187082	0.0187082	-3.21	-2.8789	0.539174	-0.539174	LOC102551716	RCAN2			RCAN2
1374235_at	0.0190973	0.0190973	-3.2	-2.8984	0.530913	-0.530913	Rcan2	MYZAP			MYZAP
1374816_at	0.0195323	0.0195323	-3.18	-2.9198	0.612872	-0.612872	Myzap	NALCN			NALCN
1370555_at	0.0195399	0.0195399	-3.18	-2.9202	0.627439	-0.627439	Nalcn	PPM1K			PPM1K
1388778_at	0.0196194	0.0196194	-3.17	-2.9241	0.596344	-0.596344	Ppm1k	PANK2			PANK2
1392033_a_at	0.0196551	0.0196551	-3.17	-2.9258	1.75398	-1.75398	Pank2	SCN9A			SCN9A
1368539_at	0.0197102	0.0197102	-3.17	-2.9285	1.38988	-1.38988	Scn9a	MMACHC			MMACHC
1376214_at	0.0197547	0.0197547	-3.17	-2.9306	0.790068	-0.790068	Mmachc	SLC25A27			SLC25A27
1387433_a_at	0.0197888	0.0197888	-3.17	-2.9322	0.770982	-0.770982	Slc25a27	FAM210B			FAM210B
1374943_at	0.0197987	0.0197987	-3.17	-2.9327	0.535611	-0.535611	Fam210b	LOC498368			LOC498368
1389054_at	0.0198176	0.0198176	-3.17	-2.9336	0.572565	-0.572565	LOC498368	CALML4			CALML4
1375026_at	0.0198743	0.0198743	-3.16	-2.9363	1.22548	-1.22548	Calml4	MCAT			MCAT
1375241_at	0.0198751	0.0198751	-3.16	-2.9364	1.96595	-1.96595	Mcat	B4GALNT1			B4GALNT1
1398272_at	0.0198887	0.0198887	-3.16	-2.937	1.67685	-1.67685	B4galnt1	NICN1			NICN1
1383065_at	0.0198974	0.0198974	-3.16	-2.9374	0.610202	-0.610202	Nicn1	NDUFV3			NDUFV3
1368566_a_at	0.0199099	0.0199099	-3.16	-2.938	0.505723	-0.505723	Ndufv3	VAMP2			VAMP2
1369974_at	0.0199569	0.0199569	-3.16	-2.9403	0.55282	-0.55282	Vamp2	CMBL			CMBL
1372372_at	0.0200924	0.0200924	-3.16	-2.9467	0.597409	-0.597409	Cmbl	CAMK2N1			CAMK2N1
1370853_at	0.0204435	0.0204435	-3.14	-2.9632	0.672547	-0.672547	Camk2n1	NQO2			NQO2
1374959_at	0.0206529	0.0206529	-3.13	-2.9729	0.52143	-0.52143	Nqo2	FGF3			FGF3
1387532_at	0.0207007	0.0207007	-3.13	-2.9751	1.36649	-1.36649	Fgf3	ADAM19			ADAM19
1385665_at	0.0207044	0.0207044	-3.13	-2.9753	1.94483	-1.94483	Adam19	RPRM			RPRM
1390672_at	0.0208824	0.0208824	-3.13	-2.9834	0.57223	-0.57223	Rprm	TTL			TTL
1390311_at	0.0212001	0.0212001	-3.11	-2.9978	0.555081	-0.555081	Ttl	SSPN			SSPN
1388866_at	0.0213705	0.0213705	-3.11	-3.0054	0.572743	-0.572743	Sspn	KCNK3			KCNK3
1398313_a_at	0.0218536	0.0218536	-3.09	-3.0267	0.760272	-0.760272	Kcnk3	RGD1560854			RGD1560854
1373638_at	0.0219148	0.0219148	-3.09	-3.0293	0.82389	-0.82389	RGD1560854	SRL			SRL
1371746_at	0.0219689	0.0219689	-3.09	-3.0317	0.60646	-0.60646	Srl	ITPKB			ITPKB
1369757_at	0.02201	0.02201	-3.08	-3.0334	0.603569	-0.603569	Itpkb	CLTB			CLTB
1375324_at	0.0220158	0.0220158	-3.08	-3.0337	0.59189	-0.59189	Cltb	RGD1308147			RGD1308147
1373547_at	0.0220544	0.0220544	-3.08	-3.0354	0.50276	-0.50276	RGD1308147	RGD1560559			RGD1560559
1377099_at	0.0222133	0.0222133	-3.08	-3.0422	0.616057	-0.616057	RGD1560559	LOC100910558			LOC100910558
1373696_at	0.0222285	0.0222285	-3.08	-3.0428	0.544668	-0.544668	LOC100910558	GDF11			GDF11
1393697_at	0.0222367	0.0222367	-3.08	-3.0432	0.60735	-0.60735	Gdf11	SMIM5			SMIM5
1373659_at	0.0225262	0.0225262	-3.07	-3.0555	0.918145	-0.918145	Smim5	IGFALS			IGFALS
1387816_at	0.0226938	0.0226938	-3.06	-3.0626	0.951612	-0.951612	Igfals	FNDC5			FNDC5
1372695_at	0.0227082	0.0227082	-3.06	-3.0632	0.506744	-0.506744	Fndc5	TRMU			TRMU
1371917_at	0.0227341	0.0227341	-3.06	-3.0643	1.22294	-1.22294	Trmu	MICALL1			MICALL1
1389187_at	0.0227434	0.0227434	-3.06	-3.0646	0.764912	-0.764912	Micall1	ANDPRO			ANDPRO
1371364_a_at	0.0227811	0.0227811	-3.06	-3.0662	1.80402	-1.80402	Andpro	ASUN			ASUN
1398669_at	0.0227868	0.0227868	-3.06	-3.0665	0.541382	-0.541382	Asun	VASH2			VASH2
1398426_at	0.022812	0.022812	-3.06	-3.0675	0.535834	-0.535834	Vash2	ZFP444			ZFP444
1398413_at	0.0228393	0.0228393	-3.05	-3.0687	1.53776	-1.53776	Zfp444	MAVS			MAVS
1376446_at	0.022874	0.022874	-3.05	-3.0701	0.754657	-0.754657	Mavs	MTFP1			MTFP1
1388661_at	0.0230181	0.0230181	-3.05	-3.0761	1.07894	-1.07894	Mtfp1	RIMBP2			RIMBP2
1371020_at	0.0232346	0.0232346	-3.04	-3.085	0.666691	-0.666691	Rimbp2	RGD1310553			RGD1310553
1372202_at	0.0234516	0.0234516	-3.03	-3.0938	0.567774	-0.567774	RGD1310553	SLC25A20			SLC25A20
1398249_at	0.0234755	0.0234755	-3.03	-3.0948	0.601312	-0.601312	Slc25a20	SORD			SORD
1369635_at	0.0234931	0.0234931	-3.03	-3.0955	0.536899	-0.536899	Sord	PTH2R			PTH2R
1369461_at	0.0235867	0.0235867	-3.03	-3.0993	1.50111	-1.50111	Pth2r	TMEM38A			TMEM38A
1389171_at	0.0235961	0.0235961	-3.03	-3.0997	0.505348	-0.505348	Tmem38a	MYBPC3			MYBPC3
1388597_at	0.0236155	0.0236155	-3.03	-3.1005	0.522246	-0.522246	Mybpc3	MTRF1L			MTRF1L
1375260_at	0.0236254	0.0236254	-3.03	-3.1009	1.83435	-1.83435	Mtrf1l	ALDH1A7			ALDH1A7
1368718_at	0.0237476	0.0237476	-3.02	-3.1058	0.974647	-0.974647	Aldh1a7	CCDC126			CCDC126
1374929_at	0.0237614	0.0237614	-3.02	-3.1063	0.572281	-0.572281	Ccdc126	WIPF3			WIPF3
1370648_a_at	0.0238241	0.0238241	-3.02	-3.1088	0.860328	-0.860328	Wipf3	EPDR1			EPDR1
1375855_at	0.0241155	0.0241155	-3.01	-3.1204	0.5337	-0.5337	Epdr1	ASIC2			ASIC2
1368465_at	0.0242467	0.0242467	-3.01	-3.1256	1.05477	-1.05477	Asic2	FAM127C			FAM127C
1371531_at	0.0243046	0.0243046	-3.01	-3.1279	0.555255	-0.555255	Fam127c	HS3ST2			HS3ST2
1374046_at	0.0243353	0.0243353	-3	-3.1291	1.63821	-1.63821	Hs3st2	RGD1306750			RGD1306750
1377355_at	0.0245127	0.0245127	-3	-3.136	0.666599	-0.666599	RGD1306750	TMOD1			TMOD1
1387370_at	0.0245181	0.0245181	-3	-3.1362	0.537488	-0.537488	Tmod1	LOC102547411			LOC102547411
1376716_at	0.024983	0.024983	-2.98	-3.1541	0.633158	-0.633158	LOC102547411	MPC1			MPC1
1386867_at	0.0250063	0.0250063	-2.98	-3.155	0.650145	-0.650145	Mpc1	SYP			SYP
1368276_at	0.025254	0.025254	-2.98	-3.1644	0.538949	-0.538949	Syp	KCNJ11			KCNJ11
1387698_at	0.0252785	0.0252785	-2.97	-3.1653	0.582494	-0.582494	Kcnj11	SH3BP4			SH3BP4
1387106_at	0.0252922	0.0252922	-2.97	-3.1658	0.715626	-0.715626	Sh3bp4	LOC500300			LOC500300
1372213_at	0.0253772	0.0253772	-2.97	-3.169	0.6863	-0.6863	LOC500300	ADRB2			ADRB2
1369115_at	0.025661	0.025661	-2.96	-3.1796	0.531026	-0.531026	Adrb2	COQ9			COQ9
1388570_at	0.0257043	0.0257043	-2.96	-3.1812	0.550044	-0.550044	Coq9	DSPP			DSPP
1370734_a_at	0.025797	0.025797	-2.96	-3.1846	1.79436	-1.79436	Dspp	WDR59			WDR59
1375045_at	0.0258059	0.0258059	-2.96	-3.185	0.668821	-0.668821	Wdr59	GTPBP1			GTPBP1
1398985_at	0.0258143	0.0258143	-2.96	-3.1853	0.62267	-0.62267	Gtpbp1	TMEM5			TMEM5
1376450_at	0.0258773	0.0258773	-2.96	-3.1876	0.546268	-0.546268	Tmem5	HSPB2			HSPB2
1370018_at	0.0261093	0.0261093	-2.95	-3.1961	0.536563	-0.536563	Hspb2	MDH1			MDH1
1372790_at	0.0262523	0.0262523	-2.95	-3.2013	0.523271	-0.523271	Mdh1	LOC102547830			LOC102547830
1389272_at	0.0262717	0.0262717	-2.94	-3.202	0.752749	-0.752749	LOC102547830	MAK			MAK
1387324_at	0.0263344	0.0263344	-2.94	-3.2043	2.53761	-2.53761	Mak	PXYLP1			PXYLP1
1389229_at	0.026431	0.026431	-2.94	-3.2078	0.544574	-0.544574	Pxylp1	COLQ			COLQ
1368475_at	0.0266794	0.0266794	-2.93	-3.2167	0.580916	-0.580916	Colq	NIFK			NIFK
1369915_at	0.02681	0.02681	-2.93	-3.2213	0.510962	-0.510962	Nifk	MIGA1			MIGA1
1373580_at	0.0268503	0.0268503	-2.93	-3.2228	1.16315	-1.16315	Miga1	HLF			HLF
1374709_at	0.0269818	0.0269818	-2.92	-3.2274	0.676448	-0.676448	Hlf	SIRT3			SIRT3
1372925_at	0.0270707	0.0270707	-2.92	-3.2306	0.509747	-0.509747	Sirt3	PLPPR3			PLPPR3
1374344_at	0.0271965	0.0271965	-2.92	-3.235	0.55554	-0.55554	Plppr3	S100A1			S100A1
1388456_at	0.0272404	0.0272404	-2.92	-3.2365	0.558417	-0.558417	S100a1	ADGRB1			ADGRB1
1376504_at	0.0273885	0.0273885	-2.91	-3.2417	1.44053	-1.44053	Adgrb1	ACSL1			ACSL1
1370939_at	0.0274242	0.0274242	-2.91	-3.2429	0.671814	-0.671814	Acsl1	UBE2D1			UBE2D1
1385548_at	0.0275327	0.0275327	-2.91	-3.2467	0.57364	-0.57364	Ube2d1	HTR3B			HTR3B
1387602_a_at	0.0275679	0.0275679	-2.91	-3.2479	1.1134	-1.1134	Htr3b	FABP1			FABP1
1369111_at	0.0278028	0.0278028	-2.9	-3.256	1.18631	-1.18631	Fabp1	CERKL			CERKL
1386327_at	0.0278783	0.0278783	-2.9	-3.2586	1.0536	-1.0536	Cerkl	FAM63B			FAM63B
1393505_x_at	0.027933	0.027933	-2.9	-3.2604	0.691696	-0.691696	Fam63b	SLC45A3			SLC45A3
1389113_at	0.0279954	0.0279954	-2.9	-3.2626	0.633016	-0.633016	Slc45a3	SPINK8			SPINK8
1371677_at	0.02809	0.02809	-2.89	-3.2658	0.513159	-0.513159	Spink8	GBA2			GBA2
1399040_at	0.0281873	0.0281873	-2.89	-3.2691	0.631828	-0.631828	Gba2	EPM2AIP1			EPM2AIP1
1372568_at	0.02835	0.02835	-2.89	-3.2746	0.602068	-0.602068	Epm2aip1	SERPINH1			SERPINH1
1369009_at	0.028476	0.028476	-2.88	-3.2788	2.38355	-2.38355	Serpinh1	PITPNB			PITPNB
1367674_at	0.028492	0.028492	-2.88	-3.2793	0.604316	-0.604316	Pitpnb	CDIP1			CDIP1
1375674_at	0.0286162	0.0286162	-2.88	-3.2835	0.537401	-0.537401	Cdip1	AMELX			AMELX
1387634_a_at	0.0290912	0.0290912	-2.87	-3.2992	2.47971	-2.47971	Amelx	PIP			PIP
1367781_at	0.0291486	0.0291486	-2.86	-3.301	1.2128	-1.2128	Pip	PRKCE			PRKCE
1374593_at	0.0292903	0.0292903	-2.86	-3.3057	0.509465	-0.509465	Prkce	BEGAIN			BEGAIN
1368999_a_at	0.0293679	0.0293679	-2.86	-3.3082	0.731322	-0.731322	Begain	UBL4A			UBL4A
1373249_at	0.0294396	0.0294396	-2.86	-3.3105	0.551644	-0.551644	Ubl4a	CHRNB2			CHRNB2
1369432_at	0.0296328	0.0296328	-2.85	-3.3168	1.95792	-1.95792	Chrnb2	MFRP			MFRP
1377434_at	0.0297134	0.0297134	-2.85	-3.3193	1.05266	-1.05266	Mfrp	KCNK2			KCNK2
1370342_at	0.0298518	0.0298518	-2.85	-3.3238	0.686609	-0.686609	Kcnk2	CYP11A1			CYP11A1
1368468_at	0.0298972	0.0298972	-2.84	-3.3252	0.688021	-0.688021	Cyp11a1	LHCGR			LHCGR
1369033_at	0.0299639	0.0299639	-2.84	-3.3273	0.727842	-0.727842	Lhcgr	SLC18A3			SLC18A3
1368615_a_at	0.0301311	0.0301311	-2.84	-3.3326	1.0561	-1.0561	Slc18a3	PDK2			PDK2
1367892_at	0.0301785	0.0301785	-2.84	-3.3341	0.566316	-0.566316	Pdk2	LOC100174910			LOC100174910
1373964_at	0.0305018	0.0305018	-2.83	-3.3443	0.733993	-0.733993	LOC100174910	STUB1			STUB1
1398910_at	0.030516	0.030516	-2.83	-3.3447	0.517004	-0.517004	Stub1	TMEM59L			TMEM59L
1373414_at	0.0305254	0.0305254	-2.83	-3.345	0.511806	-0.511806	Tmem59l	RALGAPA1			RALGAPA1
1368994_a_at	0.0305717	0.0305717	-2.83	-3.3465	0.635459	-0.635459	Ralgapa1	FAM210A			FAM210A
1388465_at	0.0305817	0.0305817	-2.83	-3.3468	0.568796	-0.568796	Fam210a	KCNJ12			KCNJ12
1369795_at	0.030592	0.030592	-2.83	-3.3471	1.53936	-1.53936	Kcnj12	ITGB1BP2			ITGB1BP2
1388961_at	0.0306986	0.0306986	-2.82	-3.3504	0.523894	-0.523894	Itgb1bp2	ADH7			ADH7
1369072_at	0.0307606	0.0307606	-2.82	-3.3523	1.9713	-1.9713	Adh7	DRP2			DRP2
1388261_at	0.030815	0.030815	-2.82	-3.354	1.24821	-1.24821	Drp2	LOC102549032			LOC102549032
1380322_at	0.0309948	0.0309948	-2.82	-3.3596	1.04546	-1.04546	LOC102549032	ALAS1			ALAS1
1367982_at	0.031032	0.031032	-2.82	-3.3607	0.566412	-0.566412	Alas1	OLIG1			OLIG1
1387200_at	0.0310687	0.0310687	-2.82	-3.3618	1.17228	-1.17228	Olig1	KY			KY
1375445_at	0.0312515	0.0312515	-2.81	-3.3674	0.512694	-0.512694	Ky	NEFH			NEFH
1370815_at	0.0314223	0.0314223	-2.81	-3.3726	0.939789	-0.939789	Nefh	GAL			GAL
1387088_at	0.0316235	0.0316235	-2.8	-3.3787	0.830903	-0.830903	Gal	SYNJ2BP			SYNJ2BP
1368038_at	0.0317926	0.0317926	-2.8	-3.3838	0.667438	-0.667438	Synj2bp	PADI2			PADI2
1387091_at	0.0319343	0.0319343	-2.79	-3.388	0.50062	-0.50062	Padi2	UNC13C			UNC13C
1370546_at	0.03204	0.03204	-2.79	-3.3912	0.64898	-0.64898	Unc13c	CYP3A2			CYP3A2
1370593_at	0.0320864	0.0320864	-2.79	-3.3926	0.811013	-0.811013	Cyp3a2	LOC56764			LOC56764
1368664_at	0.0320868	0.0320868	-2.79	-3.3926	0.675434	-0.675434	LOC56764	ACAD10			ACAD10
1389757_at	0.0321632	0.0321632	-2.79	-3.3948	0.539581	-0.539581	Acad10	PRP2L1			PRP2L1
1372702_at	0.0321725	0.0321725	-2.79	-3.3951	1.74702	-1.74702	Prp2l1	CEP78			CEP78
1369433_at	0.0326467	0.0326467	-2.78	-3.4091	1.45773	-1.45773	Cep78	CRYL1			CRYL1
1376051_at	0.0326798	0.0326798	-2.78	-3.41	0.594221	-0.594221	Cryl1	CCR4			CCR4
1369555_at	0.0331415	0.0331415	-2.77	-3.4234	0.757627	-0.757627	Ccr4	LOC102556485			LOC102556485
1380599_at	0.0338513	0.0338513	-2.75	-3.4436	2.04782	-2.04782	LOC102556485	STXBP5			STXBP5
1374957_at	0.0338722	0.0338722	-2.75	-3.4442	1.50641	-1.50641	Stxbp5	CDS1			CDS1
1368248_at	0.034199	0.034199	-2.74	-3.4533	1.04004	-1.04004	Cds1	RASD2			RASD2
1370373_at	0.0343827	0.0343827	-2.74	-3.4584	1.05171	-1.05171	Rasd2	FBXW5			FBXW5
1388518_at	0.0344467	0.0344467	-2.74	-3.4602	0.544855	-0.544855	Fbxw5	PDP2			PDP2
1370509_at	0.0345396	0.0345396	-2.73	-3.4628	0.520484	-0.520484	Pdp2	RBM7			RBM7
1394155_at	0.0347896	0.0347896	-2.73	-3.4696	0.634172	-0.634172	Rbm7	RYR1			RYR1
1390355_at	0.0348169	0.0348169	-2.73	-3.4704	0.829813	-0.829813	Ryr1	CEP128			CEP128
1374225_at	0.0350021	0.0350021	-2.72	-3.4754	0.577623	-0.577623	Cep128	INPPL1			INPPL1
1370651_a_at	0.0351895	0.0351895	-2.72	-3.4805	0.505768	-0.505768	Inppl1	SLC5A5			SLC5A5
1369020_at	0.035348	0.035348	-2.72	-3.4848	0.864007	-0.864007	Slc5a5	CLPS			CLPS
1368196_at	0.0355684	0.0355684	-2.71	-3.4907	2.08155	-2.08155	Clps	RGD1309036			RGD1309036
1389766_at	0.0358172	0.0358172	-2.71	-3.4974	0.629011	-0.629011	RGD1309036	KDM2A			KDM2A
1390522_at	0.0358516	0.0358516	-2.71	-3.4983	0.513306	-0.513306	Kdm2a	RAD52			RAD52
1377902_a_at	0.0360462	0.0360462	-2.7	-3.5034	0.737762	-0.737762	Rad52	CYP7A1			CYP7A1
1368458_at	0.0361586	0.0361586	-2.7	-3.5064	0.547821	-0.547821	Cyp7a1	TWF2			TWF2
1372135_at	0.036222	0.036222	-2.7	-3.5081	0.525721	-0.525721	Twf2	PPP1R3C			PPP1R3C
1373108_at	0.0363324	0.0363324	-2.7	-3.511	0.609649	-0.609649	Ppp1r3c	ARHGEF37			ARHGEF37
1377423_at	0.0363515	0.0363515	-2.7	-3.5115	0.608836	-0.608836	Arhgef37	CUZD1			CUZD1
1368367_at	0.0363877	0.0363877	-2.69	-3.5124	1.55717	-1.55717	Cuzd1	TMLHE			TMLHE
1387357_at	0.0364413	0.0364413	-2.69	-3.5138	0.56102	-0.56102	Tmlhe	SMARCC2			SMARCC2
1390043_at	0.0365906	0.0365906	-2.69	-3.5177	0.980517	-0.980517	Smarcc2	DNAJA3			DNAJA3
1378392_at	0.0365965	0.0365965	-2.69	-3.5178	0.564911	-0.564911	Dnaja3	AQP8			AQP8
1368316_at	0.0368022	0.0368022	-2.69	-3.5232	0.715263	-0.715263	Aqp8	ACOT13			ACOT13
1388497_at	0.0370961	0.0370961	-2.68	-3.5308	0.569662	-0.569662	Acot13	TRDN			TRDN
1370738_a_at	0.0371248	0.0371248	-2.68	-3.5315	0.616713	-0.616713	Trdn	TUBA8			TUBA8
1390766_at	0.0371912	0.0371912	-2.68	-3.5332	1.00779	-1.00779	Tuba8	SNCB			SNCB
1369924_at	0.0373905	0.0373905	-2.67	-3.5383	1.01958	-1.01958	Sncb	SLCO1A6			SLCO1A6
1369401_at	0.0374276	0.0374276	-2.67	-3.5392	2.48142	-2.48142	Slco1a6	PANK4			PANK4
1369938_at	0.0374324	0.0374324	-2.67	-3.5394	0.61398	-0.61398	Pank4	RAB40C			RAB40C
1372636_at	0.0374445	0.0374445	-2.67	-3.5397	0.602906	-0.602906	Rab40c	WDR17			WDR17
1376017_at	0.0376948	0.0376948	-2.67	-3.546	1.70626	-1.70626	Wdr17	KCNG2			KCNG2
1390473_at	0.0377128	0.0377128	-2.67	-3.5465	0.742154	-0.742154	Kcng2	PCCA			PCCA
1371963_at	0.0377435	0.0377435	-2.67	-3.5472	0.560014	-0.560014	Pcca	JPH2			JPH2
1372159_at	0.0379066	0.0379066	-2.66	-3.5513	0.544173	-0.544173	Jph2	CYP8B1			CYP8B1
1368435_at	0.037993	0.037993	-2.66	-3.5535	1.62776	-1.62776	Cyp8b1	NRAP			NRAP
1374099_at	0.0384955	0.0384955	-2.65	-3.566	0.512521	-0.512521	Nrap	RBFOX3			RBFOX3
1377095_at	0.0385389	0.0385389	-2.65	-3.5671	1.31648	-1.31648	Rbfox3	ENSA			ENSA
1389912_at	0.0385763	0.0385763	-2.65	-3.568	0.517352	-0.517352	Ensa	COQ8A			COQ8A
1372536_at	0.0386307	0.0386307	-2.65	-3.5693	0.567258	-0.567258	Coq8a	AFF2			AFF2
1376350_at	0.0386468	0.0386468	-2.65	-3.5697	1.09652	-1.09652	Aff2	THRSP			THRSP
1371400_at	0.0389689	0.0389689	-2.64	-3.5776	0.553106	-0.553106	Thrsp	SLC24A1			SLC24A1
1387829_at	0.03939	0.03939	-2.63	-3.5879	0.887758	-0.887758	Slc24a1	USP21			USP21
1371934_at	0.0393976	0.0393976	-2.63	-3.5881	0.50967	-0.50967	Usp21	CAV3			CAV3
1387814_at	0.0394439	0.0394439	-2.63	-3.5892	0.558103	-0.558103	Cav3	TRPM3			TRPM3
1377142_at	0.0396454	0.0396454	-2.63	-3.594	1.27812	-1.27812	Trpm3	ATP5S			ATP5S
1382446_at	0.0398247	0.0398247	-2.63	-3.5983	0.507851	-0.507851	Atp5s	HAO2			HAO2
1387139_at	0.039827	0.039827	-2.63	-3.5984	1.2418	-1.2418	Hao2	TTN			TTN
1375518_at	0.0399056	0.0399056	-2.63	-3.6002	0.541698	-0.541698	Ttn	MYH2			MYH2
1388139_at	0.0402529	0.0402529	-2.62	-3.6085	1.1073	-1.1073	Myh2	SCN7A			SCN7A
1370973_at	0.040514	0.040514	-2.61	-3.6146	0.62029	-0.62029	Scn7a	MRPS11			MRPS11
1372215_at	0.0405471	0.0405471	-2.61	-3.6154	0.578379	-0.578379	Mrps11	SCTR			SCTR
1387671_at	0.0406313	0.0406313	-2.61	-3.6174	0.67021	-0.67021	Sctr	TRIM72			TRIM72
1374017_at	0.040677	0.040677	-2.61	-3.6185	0.5002	-0.5002	Trim72	RD3L			RD3L
1373856_at	0.0408333	0.0408333	-2.61	-3.6221	0.645827	-0.645827	Rd3l	EPB4.1L5			EPB4.1L5
1374984_at	0.0410031	0.0410031	-2.6	-3.6261	1.32726	-1.32726	Epb4.1l5	GRM1			GRM1
1371238_at	0.0410397	0.0410397	-2.6	-3.6269	1.34901	-1.34901	Grm1	EPHA7			EPHA7
1388061_a_at	0.0412321	0.0412321	-2.6	-3.6313	0.728378	-0.728378	Epha7	KRT19			KRT19
1388433_at	0.0412337	0.0412337	-2.6	-3.6314	1.81597	-1.81597	Krt19	ROBO1			ROBO1
1369338_at	0.0414691	0.0414691	-2.6	-3.6368	0.79921	-0.79921	Robo1	TMEM71			TMEM71
1392683_at	0.0417238	0.0417238	-2.59	-3.6426	0.626184	-0.626184	Tmem71	PAMR1			PAMR1
1377018_at	0.0419663	0.0419663	-2.59	-3.6481	1.94099	-1.94099	Pamr1	CKMT1B			CKMT1B
1390566_a_at	0.0419949	0.0419949	-2.59	-3.6488	1.1686	-1.1686	Ckmt1b	NDUFB8			NDUFB8
1375628_at	0.0421015	0.0421015	-2.58	-3.6512	0.51032	-0.51032	Ndufb8	DCAF4			DCAF4
1376603_at	0.0421782	0.0421782	-2.58	-3.6529	0.557281	-0.557281	Dcaf4	LOC102556889			LOC102556889
1377065_at	0.0422049	0.0422049	-2.58	-3.6535	0.687153	-0.687153	LOC102556889	FOXRED1			FOXRED1
1376921_at	0.0424138	0.0424138	-2.58	-3.6582	0.6078	-0.6078	Foxred1	GRPCA			GRPCA
1370272_x_at	0.0426266	0.0426266	-2.58	-3.663	0.907758	-0.907758	Grpca	BPIFB4			BPIFB4
1384547_at	0.0429445	0.0429445	-2.57	-3.67	0.728696	-0.728696	Bpifb4	PNKD			PNKD
1373312_at	0.0430244	0.0430244	-2.57	-3.6718	0.575418	-0.575418	Pnkd	P4HA2			P4HA2
1375332_at	0.0431641	0.0431641	-2.57	-3.6749	0.662274	-0.662274	P4ha2	LOC687508			LOC687508
1374698_at	0.0432417	0.0432417	-2.56	-3.6766	0.583255	-0.583255	LOC687508	PEX10			PEX10
1384237_at	0.0432754	0.0432754	-2.56	-3.6773	1.61151	-1.61151	Pex10	NPPB			NPPB
1367616_at	0.0433052	0.0433052	-2.56	-3.678	0.534096	-0.534096	Nppb	UBE2B			UBE2B
1386924_at	0.0434322	0.0434322	-2.56	-3.6808	0.717815	-0.717815	Ube2b	PTDSS2			PTDSS2
1372663_at	0.0439046	0.0439046	-2.55	-3.691	0.569978	-0.569978	Ptdss2	ITIH4			ITIH4
1368707_at	0.0439503	0.0439503	-2.55	-3.692	0.581042	-0.581042	Itih4	COL27A1			COL27A1
1375708_at	0.0439674	0.0439674	-2.55	-3.6924	0.954267	-0.954267	Col27a1	GABARAPL1			GABARAPL1
1371680_at	0.0447574	0.0447574	-2.54	-3.7093	0.601254	-0.601254	Gabarapl1	NEUROD2			NEUROD2
1387577_at	0.0450489	0.0450489	-2.53	-3.7155	0.89308	-0.89308	Neurod2	FGFR2			FGFR2
1375129_at	0.0451009	0.0451009	-2.53	-3.7166	0.671086	-0.671086	Fgfr2	TMEM179			TMEM179
1372848_at	0.0451633	0.0451633	-2.53	-3.7179	0.630473	-0.630473	Tmem179	SVS6			SVS6
1371370_a_at	0.045302	0.045302	-2.53	-3.7208	1.84876	-1.84876	Svs6	IL1A			IL1A
1371170_a_at	0.0453881	0.0453881	-2.53	-3.7226	0.80802	-0.80802	Il1a	PTGDS			PTGDS
1367851_at	0.0455611	0.0455611	-2.53	-3.7262	0.817815	-0.817815	Ptgds	CACNG2			CACNG2
1375735_at	0.0455842	0.0455842	-2.53	-3.7267	0.728756	-0.728756	Cacng2	GNB5			GNB5
1382105_at	0.0457554	0.0457554	-2.52	-3.7303	0.612709	-0.612709	Gnb5	ROBO2			ROBO2
1382632_at	0.0459991	0.0459991	-2.52	-3.7353	1.98669	-1.98669	Robo2	ENTPD6			ENTPD6
1368315_at	0.0460078	0.0460078	-2.52	-3.7355	0.590929	-0.590929	Entpd6	ATPAF2			ATPAF2
1371892_at	0.0461352	0.0461352	-2.52	-3.7381	0.538229	-0.538229	Atpaf2	FTCD			FTCD
1387877_at	0.0463171	0.0463171	-2.51	-3.7418	1.35451	-1.35451	Ftcd	TBX3			TBX3
1381464_at	0.0463926	0.0463926	-2.51	-3.7434	0.942443	-0.942443	Tbx3	AK1			AK1
1370011_at	0.0464772	0.0464772	-2.51	-3.7451	0.523392	-0.523392	Ak1	TRIM9			TRIM9
1387486_at	0.046687	0.046687	-2.51	-3.7494	1.03422	-1.03422	Trim9	GRM8			GRM8
1371243_at	0.0467322	0.0467322	-2.51	-3.7503	1.82966	-1.82966	Grm8	PDC			PDC
1369139_at	0.0468894	0.0468894	-2.5	-3.7535	0.821426	-0.821426	Pdc	MRPL1			MRPL1
1389125_at	0.0469107	0.0469107	-2.5	-3.7539	0.61965	-0.61965	Mrpl1	HDDC3			HDDC3
1372762_at	0.0469163	0.0469163	-2.5	-3.7541	0.545624	-0.545624	Hddc3	SLC38A3			SLC38A3
1370824_at	0.047134	0.047134	-2.5	-3.7584	1.05192	-1.05192	Slc38a3	PAFAH1B1			PAFAH1B1
1392890_at	0.0473686	0.0473686	-2.5	-3.7632	1.68478	-1.68478	Pafah1b1	ERBB2			ERBB2
1387813_at	0.047411	0.047411	-2.5	-3.764	1.33362	-1.33362	Erbb2	LYRM9			LYRM9
1390160_at	0.0474474	0.0474474	-2.5	-3.7647	0.576457	-0.576457	Lyrm9	KRTDAP			KRTDAP
1388971_s_at	0.0475651	0.0475651	-2.49	-3.7671	1.94395	-1.94395	Krtdap	F8A1			F8A1
1375434_at	0.0475769	0.0475769	-2.49	-3.7673	1.44667	-1.44667	F8a1	RRP1B			RRP1B
1373516_at	0.0480764	0.0480764	-2.49	-3.7772	0.50605	-0.50605	Rrp1b	SCN4B			SCN4B
1373188_at	0.048282	0.048282	-2.48	-3.7813	0.596752	-0.596752	Scn4b	FHOD3			FHOD3
1374667_at	0.0484085	0.0484085	-2.48	-3.7838	0.605358	-0.605358	Fhod3	EGR4			EGR4
1387442_at	0.0484369	0.0484369	-2.48	-3.7843	0.952884	-0.952884	Egr4	PTPN3			PTPN3
1389362_at	0.0485836	0.0485836	-2.48	-3.7872	0.597783	-0.597783	Ptpn3	USP32			USP32
1390486_at	0.0487287	0.0487287	-2.48	-3.79	0.881786	-0.881786	Usp32	POU2F3			POU2F3
1388220_at	0.0491415	0.0491415	-2.47	-3.798	0.556137	-0.556137	Pou2f3	LOC102550403			LOC102550403
1391996_a_at	0.0491492	0.0491492	-2.47	-3.7982	1.99508	-1.99508	LOC102550403	SYNJ2			SYNJ2
1368971_a_at	0.0493358	0.0493358	-2.47	-3.8018	0.591684	-0.591684	Synj2	LOC103693948			LOC103693948
1390685_at	0.0496134	0.0496134	-2.46	-3.8071	1.06903	-1.06903	LOC103693948	HRH4			HRH4
1387590_at	0.049711	0.049711	-2.46	-3.8089	1.03758	-1.03758	Hrh4	IAPP			IAPP
1387660_at	0.0497443	0.0497443	-2.46	-3.8096	1.37175	-1.37175	Iapp
